# Supplementary material for: Assessing Onchocerca volvulus Intensity of Infection and Genetic Diversity Using Mitochondrial Genome Sequencing of Single Microfilariae Obtained before and after Ivermectin Treatment
Source: Pathogens. 2023 Jul 24;12(7):971. doi: 10.3390/pathogens12070971 (PMC10385737; doi:10.3390/pathogens12070971)
Supplement: Supplementary file 1 [file pathogens-12-00971-s001.zip › Hedtke Supplementary Table S1.xlsx]

## Sheet: Hedtke Supplementary Table S1
Country	Sample name	Developmental stage	NCBI Project Number	WGA kit	Library Construction Kit	Illumina sequencing platform	# raw read pairs	read length	Minimum read length retained post-trimming	# trimmed pairs	# mapped to human	% human	# reads mapped (without secondary/ supplementary)	# secondary/ supplementary reads	% duplication	# unique	average depth mt	% coverage mt with depth >20	average depth nuclear	% coverage nuclear depth >20	average depth wOv	% coverage depth >20 wOv
Democratic Republic of Congo	DRC_ITU_OAE015_3B_1_1_D120	microfilaria	PRJNA981587	REPLIG	Illumina Nextera DNA Flex	NextSeq 550	953110	150	75	824723	189708	0.115	1157737	147957	0.0446	1085194	1847.63	99.55	1.29	1.03	0.33	0.02
Democratic Republic of Congo	DRC_ITU_OAE015_3B_1_1_D120	microfilaria	PRJNA981587	REPLIG	Illumina Nextera DNA Flex	NextSeq 550	8249432	150	75	6970670	1558613	0.1118	9809822	1223155	0.1152	8509082	12503.3	99.98	10.36	9.75	2.76	3.36
Democratic Republic of Congo	DRC_ITU_OAE015_3B_1_3_D120	microfilaria	PRJNA981587	REPLIG	Illumina Nextera DNA Flex	NextSeq 550	966393	150	75	858500	1557	0.0009	1701325	812597	0.2181	1216620	9647.86	100	0.08	0.05	0	0
Democratic Republic of Congo	DRC_ITU_OAE015_3B_1_4_D120	microfilaria	PRJNA981587	REPLIG	Illumina Nextera DNA Flex	NextSeq 550	1239436	150	75	1113098	969	0.0004	2219104	981662	0.2428	1602305	13382.4	100	0.06	0.02	0	0
Democratic Republic of Congo	DRC_ITU_OAE015_3B_1_5_D120	microfilaria	PRJNA981587	REPLIG	Illumina Nextera DNA Flex	NextSeq 550	1153976	150	75	1026570	5067	0.0025	2013355	828287	0.2034	1508131	11310.5	100	0.2	0.15	0.11	0.04
Democratic Republic of Congo	DRC_ITU_OAE015_3B_1_6_D120	microfilaria	PRJNA981587	REPLIG	Illumina Nextera DNA Flex	NextSeq 550	1248404	150	75	1120078	141658	0.0632	1876083	887018	0.2309	1334515	11136.1	100	0.02	0.01	0	0
Democratic Republic of Congo	DRC_ITU_OAE015_3B_1_7_D120	microfilaria	PRJNA981587	REPLIG	Illumina Nextera DNA Flex	NextSeq 550	1270784	150	75	1134901	2265	0.001	2251326	924964	0.2502	1594126	12828	99.99	0.15	0.07	0.11	0
Democratic Republic of Congo	DRC_ITU_OAE015_3B_1_8_D120	microfilaria	PRJNA981587	REPLIG	Illumina Nextera DNA Flex	NextSeq 550	1660945	150	75	1475643	246039	0.0834	2350589	610219	0.1921	1838280	7790.97	99.94	1.28	0.9	0.29	0.38
Democratic Republic of Congo	DRC_ITU_OAE015_3B_1_8_D120	microfilaria	PRJNA981587	REPLIG	Illumina Nextera DNA Flex	NextSeq 550	10497702	150	75	9155432	1483510	0.081	14606101	3730033	0.3224	9570105	32819.2	100	7.84	8.97	1.73	1.91
Democratic Republic of Congo	DRC_ITU_OAE015_3B_2_1_D120	microfilaria	PRJNA981587	REPLIG	Illumina Nextera DNA Flex	NextSeq 550	1034671	150	75	916610	9952	0.0054	1796744	789713	0.1936	1348718	10539.8	100	0.16	0.08	0.11	0
Democratic Republic of Congo	DRC_ITU_OAE015_3B_2_2_D120	microfilaria	PRJNA981587	REPLIG	Illumina Nextera DNA Flex	NextSeq 550	915580	150	75	818568	41262	0.0252	1166995	540572	0.1893	873599	7285.43	100	0.02	0.01	0.11	0.2
Democratic Republic of Congo	DRC_ITU_OAE015_3B_2_3_D120	microfilaria	PRJNA981587	REPLIG	Illumina Nextera DNA Flex	NextSeq 550	1047128	150	75	901563	938129	0.5203	861098	364747	0.1622	681013	5632.72	99.96	0.04	0.03	0.02	0
Democratic Republic of Congo	DRC_ITU_OAE015_3B_2_7_D120	microfilaria	PRJNA981587	REPLIG	Illumina Nextera DNA Flex	NextSeq 550	1263940	150	75	1099502	122532	0.0557	1329042	72953	0.0701	1219636	562.22	97.63	1.66	1.41	0.68	0.89
Democratic Republic of Congo	DRC_ITU_OAE015_3B_2_7_D120	microfilaria	PRJNA981587	REPLIG	Illumina Nextera DNA Flex	NextSeq 550	15241593	150	75	12977194	1184109	0.0456	16935897	1831812	0.2545	12403774	18226.3	99.95	14.67	8.35	6.7	3.85
Democratic Republic of Congo	DRC_ITU_OAE015_3B_2_8_D120	microfilaria	PRJNA981587	REPLIG	Illumina Nextera DNA Flex	NextSeq 550	1315665	150	75	1166486	1848	0.0008	2323742	692289	0.2485	1683394	9460.69	99.98	0.85	0.38	0.06	0.07
Democratic Republic of Congo	DRC_ITU_OAE015_3B_4_1_D120	microfilaria	PRJNA981587	REPLIG	Illumina Nextera DNA Flex	NextSeq 550	934226	150	75	825208	165349	0.1002	364532	147753	0.1158	305300	2631.76	99.93	0.01	0	0.01	0
Democratic Republic of Congo	DRC_ITU_OAE015_3B_4_2_D120	microfilaria	PRJNA981587	REPLIG	Illumina Nextera DNA Flex	NextSeq 550	854615	150	75	769641	137825	0.0895	332183	112551	0.1485	267541	1891.8	99.87	0.03	0.01	1.72	0.14
Democratic Republic of Congo	DRC_ITU_OAE015_3B_4_3_D120	microfilaria	PRJNA981587	REPLIG	Illumina Nextera DNA Flex	NextSeq 550	1058728	150	75	882470	273384	0.1549	122509	46541	0.0616	111348	915.51	99.51	0.01	0.01	0	0
Democratic Republic of Congo	DRC_ITU_OAE073_1_1_D0	microfilaria	PRJNA981587	REPLIG	Illumina Nextera DNA Flex	NextSeq 550	1993966	150	75	1783971	15621	0.0044	3474798	1563127	0.3357	2177072	17765.2	99.99	0.07	0.03	0.03	0
Democratic Republic of Congo	DRC_ITU_OAE073_1_2_D0	microfilaria	PRJNA981587	REPLIG	Illumina Nextera DNA Flex	NextSeq 550	1721743	150	75	1523633	171759	0.0564	1764204	737032	0.2801	1198003	9935.55	100	0.02	0.01	0.08	0.18
Democratic Republic of Congo	DRC_ITU_OAE073_1_3_D0	microfilaria	PRJNA981587	REPLIG	Illumina Nextera DNA Flex	NextSeq 550	1931312	150	75	1691300	1562	0.0005	3371210	1346446	0.3613	2040004	16896.2	100	0.06	0.02	0.05	0
Democratic Republic of Congo	DRC_ITU_OAE073_1_4_D0	microfilaria	PRJNA981587	REPLIG	Illumina Nextera DNA Flex	NextSeq 550	2124518	150	75	1867062	1823	0.0005	3722721	1760090	0.3763	2174194	17796.7	100	0.03	0.02	0.01	0
Democratic Republic of Congo	DRC_ITU_OAE073_1_5_D0	microfilaria	PRJNA981587	REPLIG	Illumina Nextera DNA Flex	NextSeq 550	2016874	150	75	1787664	4827	0.0014	3543001	1350126	0.337	2247159	17749.5	100	0.24	0.07	0.01	0
Democratic Republic of Congo	DRC_ITU_OAE073_1_6_D0	microfilaria	PRJNA981587	REPLIG	Illumina Nextera DNA Flex	NextSeq 550	1958623	150	75	1754973	35763	0.0102	3306794	1337449	0.3249	2131345	17080.1	100	0.17	0.11	0.08	0.05
Democratic Republic of Congo	DRC_ITU_OAE073_1_7_D0	microfilaria	PRJNA981587	REPLIG	Illumina Nextera DNA Flex	NextSeq 550	2303066	150	75	2042774	5377	0.0013	4058989	1774286	0.3355	2530944	19315.5	100	0.3	0.21	0.01	0
Democratic Republic of Congo	DRC_ITU_OAE073_1_8_D0	microfilaria	PRJNA981587	REPLIG	Illumina Nextera DNA Flex	NextSeq 550	1942576	150	75	1696976	76714	0.0226	2815688	1102609	0.3241	1812832	14617	100	0.12	0.06	0.12	0.2
Democratic Republic of Congo	DRC_ITU_OAE073_10_1_D0	microfilaria	PRJNA981587	REPLIG	Illumina Nextera DNA Flex	NextSeq 550	14460459	150	75	12485433	12445	0.0005	24897001	8472657	0.6031	9216118	79330.8	100	0.04	0.03	0.17	0.14
Democratic Republic of Congo	DRC_ITU_OAE073_10_7_D0	microfilaria	PRJNA981587	REPLIG	Illumina Nextera DNA Flex	NextSeq 550	2098113	150	75	1843202	1743	0.0005	3673983	1473375	0.3442	2272668	19451.8	100	0.01	0.01	0	0
Democratic Republic of Congo	DRC_ITU_OAE073_10_8_D0	microfilaria	PRJNA981587	REPLIG	Illumina Nextera DNA Flex	NextSeq 550	1625974	150	75	1433027	2466	0.0009	2850907	1076701	0.3226	1840089	15956.8	100	0.01	0	0.01	0
Democratic Republic of Congo	DRC_ITU_OAE073_11_1_D0	microfilaria	PRJNA981587	REPLIG	Illumina Nextera DNA Flex	NextSeq 550	2379716	150	75	2093551	138496	0.0331	3413372	1291264	0.3886	1996136	17010.9	100	0.02	0.01	0.05	0.13
Democratic Republic of Congo	DRC_ITU_OAE073_11_5_D0	microfilaria	PRJNA981587	REPLIG	Illumina Nextera DNA Flex	NextSeq 550	1318679	150	75	1148416	3365	0.0015	2273566	733464	0.265	1572154	9847.94	100	0.58	0.2	0.38	0.74
Democratic Republic of Congo	DRC_ITU_OAE073_11_7_D0	microfilaria	PRJNA981587	REPLIG	Illumina Nextera DNA Flex	NextSeq 550	2455548	150	75	2114352	494636	0.117	219566	80935	0.14	177187	1473.63	96.67	0	0	0.59	0.14
Democratic Republic of Congo	DRC_ITU_OAE073_11_8_D0	microfilaria	PRJNA981587	REPLIG	Illumina Nextera DNA Flex	NextSeq 550	1312677	150	75	1171618	1669	0.0007	2332522	852952	0.2948	1558344	13661.6	100	0.01	0.01	0.01	0
Democratic Republic of Congo	DRC_ITU_OAE073_2_1_D0	microfilaria	PRJNA981587	REPLIG	Illumina Nextera DNA Flex	NextSeq 550	2040581	150	75	1762627	4437	0.0013	3507306	1484750	0.3781	2031696	15306.9	100	0.24	0.2	0.16	0.03
Democratic Republic of Congo	DRC_ITU_OAE073_2_2_D0	microfilaria	PRJNA981587	REPLIG	Illumina Nextera DNA Flex	NextSeq 550	1962261	150	75	1694707	5069	0.0015	3374838	1336367	0.34	2110389	16488.1	100	0.2	0.17	0.22	0.23
Democratic Republic of Congo	DRC_ITU_OAE073_2_3_D0	microfilaria	PRJNA981587	REPLIG	Illumina Nextera DNA Flex	NextSeq 550	2172360	150	75	1896098	10668	0.0028	3736396	1528319	0.3398	2284200	16748.1	100	0.38	0.36	0.01	0
Democratic Republic of Congo	DRC_ITU_OAE073_2_4_D0	microfilaria	PRJNA981587	REPLIG	Illumina Nextera DNA Flex	NextSeq 550	1950736	150	75	1710945	264726	0.0774	1507760	574711	0.2747	1040589	7870.96	99.95	0.15	0.14	0.09	0.19
Democratic Republic of Congo	DRC_ITU_OAE073_2_5_D0	microfilaria	PRJNA981587	REPLIG	Illumina Nextera DNA Flex	NextSeq 550	1839226	150	75	1598904	50089	0.0157	2880668	951014	0.2732	2029019	13206.3	99.97	0.67	0.68	0.04	0.01
Democratic Republic of Congo	DRC_ITU_OAE073_2_6_D0	microfilaria	PRJNA981587	REPLIG	Illumina Nextera DNA Flex	NextSeq 550	1970061	150	75	1705187	4379	0.0013	3393466	1389295	0.3154	2199677	16022	100	0.35	0.33	0.06	0
Democratic Republic of Congo	DRC_ITU_OAE073_2_7_D0	microfilaria	PRJNA981587	REPLIG	Illumina Nextera DNA Flex	NextSeq 550	1924602	150	75	1707921	1737	0.0005	3404142	1412839	0.3108	2212694	17344.2	100	0.22	0.19	0.18	0.03
Democratic Republic of Congo	DRC_ITU_OAE073_2_8_D0	microfilaria	PRJNA981587	REPLIG	Illumina Nextera DNA Flex	NextSeq 550	2084150	150	75	1841828	2183	0.0006	3669514	1547415	0.3463	2258804	17582.6	99.99	0.23	0.17	0	0
Democratic Republic of Congo	DRC_ITU_OAE073_3_1_D0	microfilaria	PRJNA981587	REPLIG	Illumina Nextera DNA Flex	NextSeq 550	1745994	150	75	1569697	96848	0.0308	2523561	173905	0.1077	2172275	1747.75	97.85	2.94	2.1	2.42	1.55
Democratic Republic of Congo	DRC_ITU_OAE073_3_2_D0	microfilaria	PRJNA981587	REPLIG	Illumina Nextera DNA Flex	NextSeq 550	1609111	150	75	1467346	60520	0.0206	2574111	282881	0.4489	1357215	3157.97	98.64	0.54	0.41	0	0
Democratic Republic of Congo	DRC_ITU_OAE073_3_3_D0	microfilaria	PRJNA981587	REPLIG	Illumina Nextera DNA Flex	NextSeq 550	1769345	150	75	1559069	311402	0.0999	1396533	79238	0.2878	985094	478.31	96.86	1.35	0.54	0.03	0
Democratic Republic of Congo	DRC_ITU_OAE073_3_5_D0	microfilaria	PRJNA981587	REPLIG	Illumina Nextera DNA Flex	NextSeq 550	1558822	150	75	1387178	234543	0.0845	1344180	482330	0.2385	988352	6960.73	99.93	0.22	0.23	0.67	0.23
Democratic Republic of Congo	DRC_ITU_OAE073_3_6_D0	microfilaria	PRJNA981587	REPLIG	Illumina Nextera DNA Flex	NextSeq 550	1689419	150	75	1151957	1947986	0.8455	88174	33752	0.0696	78862	654.29	99.51	0	0	0	0
Democratic Republic of Congo	DRC_ITU_OAE073_4_2_D0	microfilaria	PRJNA981587	REPLIG	Illumina Nextera DNA Flex	NextSeq 550	1922586	150	75	1679276	1514	0.0005	3349410	1353295	0.3531	2049729	15967.8	100	0.14	0.07	0.18	0.08
Democratic Republic of Congo	DRC_ITU_OAE073_4_3_D0	microfilaria	PRJNA981587	REPLIG	Illumina Nextera DNA Flex	NextSeq 550	2091907	150	75	1848564	10206	0.0028	3640691	1118932	0.2824	2502383	13322.6	100	0.59	0.5	0.17	0.24
Democratic Republic of Congo	DRC_ITU_OAE073_4_4_D0	microfilaria	PRJNA981587	REPLIG	Illumina Nextera DNA Flex	NextSeq 550	2112038	150	75	1881791	4910	0.0013	3705573	1590792	0.3512	2299706	13418.6	99.97	0.46	0.42	0.29	0.45
Democratic Republic of Congo	DRC_ITU_OAE073_4_7_D0	microfilaria	PRJNA981587	REPLIG	Illumina Nextera DNA Flex	NextSeq 550	1840670	150	75	1616073	2111	0.0007	3217477	1406072	0.3217	2012339	11213	99.94	1.55	1.35	0.22	0.02
Democratic Republic of Congo	DRC_ITU_OAE073_4_8_D0	microfilaria	PRJNA981587	REPLIG	Illumina Nextera DNA Flex	NextSeq 550	1540774	150	75	1388512	1603	0.0006	2767920	1027022	0.2493	1972569	11581.1	99.99	0.6	0.53	0.02	0.03
Democratic Republic of Congo	DRC_ITU_OAE073_5_1_D0	microfilaria	PRJNA981587	REPLIG	Illumina Nextera DNA Flex	NextSeq 550	1485579	150	75	1342542	5079	0.0019	2665594	936497	0.2804	1865430	12443.2	99.96	0.82	0.64	1.85	2.18
Democratic Republic of Congo	DRC_ITU_OAE073_5_2_D0	microfilaria	PRJNA981587	REPLIG	Illumina Nextera DNA Flex	NextSeq 550	2053686	150	75	1816919	1638	0.0005	3623662	1353943	0.3861	2126364	15950.5	100	0.21	0.16	0.19	0.38
Democratic Republic of Congo	DRC_ITU_OAE073_5_3_D0	microfilaria	PRJNA981587	REPLIG	Illumina Nextera DNA Flex	NextSeq 550	1788758	150	75	1575121	4510	0.0014	3107580	849332	0.2061	2383145	14402.6	100	1.16	0.87	0.2	0.21
Democratic Republic of Congo	DRC_ITU_OAE073_5_5_D0	microfilaria	PRJNA981587	REPLIG	Illumina Nextera DNA Flex	NextSeq 550	1420110	150	75	1254509	2274	0.0009	2498404	914620	0.2511	1805050	19050.5	100	0.05	0.02	0.83	0.69
Democratic Republic of Congo	DRC_ITU_OAE073_6_1_D0	microfilaria	PRJNA981587	REPLIG	Illumina Nextera DNA Flex	NextSeq 550	1738421	150	75	1469318	379498	0.1291	59803	20383	0.082	52894	436.86	97.09	0	0	0.03	0.06
Democratic Republic of Congo	DRC_ITU_OAE073_6_2_D0	microfilaria	PRJNA981587	REPLIG	Illumina Nextera DNA Flex	NextSeq 550	2232043	150	75	1923283	2368	0.0006	3832292	1525757	0.3848	2229952	18329.7	100	0.07	0.04	0.05	0.01
Democratic Republic of Congo	DRC_ITU_OAE073_6_3_D0	microfilaria	PRJNA981587	REPLIG	Illumina Nextera DNA Flex	NextSeq 550	1951074	150	75	1677505	69823	0.0208	2897346	1124766	0.3512	1765233	14961	100	0.01	0.01	0.12	0.1
Democratic Republic of Congo	DRC_ITU_OAE073_6_4_D0	microfilaria	PRJNA981587	REPLIG	Illumina Nextera DNA Flex	NextSeq 550	2037370	150	75	1750054	1851	0.0005	3489724	1331952	0.3732	2128849	18181.7	99.98	0	0	0	0
Democratic Republic of Congo	DRC_ITU_OAE073_6_6_D0	microfilaria	PRJNA981587	REPLIG	Illumina Nextera DNA Flex	NextSeq 550	1937549	150	75	1685124	2386	0.0007	3358482	1120912	0.4197	1898499	16322.8	99.95	0.01	0.01	0	0
Democratic Republic of Congo	DRC_ITU_OAE073_6_7_D0	microfilaria	PRJNA981587	REPLIG	Illumina Nextera DNA Flex	NextSeq 550	1860719	150	75	1608908	1992	0.0006	3203526	1471746	0.2868	2095706	17419.5	100	0.03	0.03	0.01	0
Democratic Republic of Congo	DRC_ITU_OAE073_6_8_D0	microfilaria	PRJNA981587	REPLIG	Illumina Nextera DNA Flex	NextSeq 550	2091444	150	75	1782372	2336	0.0007	3552148	1475569	0.3552	2160051	17892.9	100	0.03	0.01	0	0
Democratic Republic of Congo	DRC_ITU_OAE073_7_1_D0	microfilaria	PRJNA981587	REPLIG	Illumina Nextera DNA Flex	NextSeq 550	2080679	150	75	1772120	3150	0.0009	3520951	1624014	0.3353	2102260	17415	100	0	0	0.04	0.02
Democratic Republic of Congo	DRC_ITU_OAE073_7_2_D0	microfilaria	PRJNA981587	REPLIG	Illumina Nextera DNA Flex	NextSeq 550	2131612	150	75	1652835	4447	0.0013	3292057	1163319	0.4428	1775067	14478	99.96	0.05	0.03	0.65	1.18
Democratic Republic of Congo	DRC_ITU_OAE073_7_3_D0	microfilaria	PRJNA981587	REPLIG	Illumina Nextera DNA Flex	NextSeq 550	2192161	150	75	1907024	1921	0.0005	3800730	1763510	0.3867	2162792	17889.3	100	0.01	0.01	0	0
Democratic Republic of Congo	DRC_ITU_OAE073_7_5_D0	microfilaria	PRJNA981587	REPLIG	Illumina Nextera DNA Flex	NextSeq 550	1564266	150	75	1363018	1351	0.0005	2713444	1247029	0.2809	1792981	14758.5	100	0.04	0.01	0.02	0
Democratic Republic of Congo	DRC_ITU_OAE073_7_6_D0	microfilaria	PRJNA981587	REPLIG	Illumina Nextera DNA Flex	NextSeq 550	1962493	150	75	1715748	1608	0.0005	3419030	1421407	0.3525	2090307	17641	100	0.03	0.02	0	0
Democratic Republic of Congo	DRC_ITU_OAE073_7_7_D0	microfilaria	PRJNA981587	REPLIG	Illumina Nextera DNA Flex	NextSeq 550	1909415	150	75	1617318	2376	0.0007	3218671	1501835	0.3017	2081809	16778.2	100	0.06	0.02	0.02	0
Democratic Republic of Congo	DRC_ITU_OAE073_7_8_D0	microfilaria	PRJNA981587	REPLIG	Illumina Nextera DNA Flex	NextSeq 550	1929915	150	75	1682941	17891	0.0053	3312665	1340753	0.3622	2016712	17078.8	100	0.01	0	0	0
Democratic Republic of Congo	DRC_ITU_OAE073_8_3_D0	microfilaria	PRJNA981587	REPLIG	Illumina Nextera DNA Flex	NextSeq 550	1590220	150	75	1389338	1951	0.0007	2764775	1141223	0.3238	1781833	15277	99.98	0.01	0.01	0	0
Democratic Republic of Congo	DRC_ITU_OAE073_8_6_D0	microfilaria	PRJNA981587	REPLIG	Illumina Nextera DNA Flex	NextSeq 550	2116350	150	75	1806969	5329	0.0015	3580942	1546502	0.3188	2339222	19519.7	100	0.01	0.01	0	0
Democratic Republic of Congo	DRC_ITU_OAE073_8_7_D0	microfilaria	PRJNA981587	REPLIG	Illumina Nextera DNA Flex	NextSeq 550	2080629	150	75	1774292	2005	0.0006	3534592	1576724	0.3125	2265795	18783.6	100	0	0	0	0
Democratic Republic of Congo	DRC_ITU_OAE073_8_8_D0	microfilaria	PRJNA981587	REPLIG	Illumina Nextera DNA Flex	NextSeq 550	2746357	150	75	2046089	1376977	0.3365	341160	125454	0.1917	254587	1992.59	99.9	0.01	0.01	0.01	0
Democratic Republic of Congo	DRC_ITU_OAE121_1_1_D0	microfilaria	PRJNA981587	REPLIG	Illumina Nextera DNA Flex	NextSeq 550	1883292	150	75	1565233	903880	0.2887	539958	193643	0.1545	426679	3243.74	99.93	0.04	0.02	0.08	0.03
Democratic Republic of Congo	DRC_ITU_OAE121_1_3_D0	microfilaria	PRJNA981587	REPLIG	Illumina Nextera DNA Flex	NextSeq 550	3061722	150	75	2446727	3324	0.0007	4882290	632924	0.2766	3467725	7772.79	98.65	3.5	2.02	2.42	2.73
Democratic Republic of Congo	DRC_ITU_OAE121_1_5_D0	microfilaria	PRJNA981587	REPLIG	Illumina Nextera DNA Flex	NextSeq 550	2984332	150	75	2454660	3436	0.0007	4890330	2035513	0.3938	2733316	22466.5	100	0.04	0.02	0.2	0.34
Democratic Republic of Congo	DRC_ITU_OAE121_1_6_D0	microfilaria	PRJNA981587	REPLIG	Illumina Nextera DNA Flex	NextSeq 550	2740018	150	75	2186705	71174	0.0163	4287569	1682158	0.4133	2318553	19275.1	100	0.03	0.01	0.01	0
Democratic Republic of Congo	DRC_ITU_OAE121_10_1_D0	microfilaria	PRJNA981587	REPLIG	Illumina Nextera DNA Flex	NextSeq 550	1720005	150	75	1525241	3603	0.0012	3023432	1128311	0.3283	1896258	15210.9	100	0.21	0.18	0.14	0.22
Democratic Republic of Congo	DRC_ITU_OAE121_10_2_D0	microfilaria	PRJNA981587	REPLIG	Illumina Nextera DNA Flex	NextSeq 550	2545634	150	75	2163309	2093	0.0005	4314213	1351978	0.4387	2302310	16510.3	100	0.51	0.45	0.79	0.72
Democratic Republic of Congo	DRC_ITU_OAE121_10_3_D0	microfilaria	PRJNA981587	REPLIG	Illumina Nextera DNA Flex	NextSeq 550	2128847	150	75	1819705	2066	0.0006	3628789	935173	0.2872	2505316	13419.6	100	1.41	0.69	0.16	0
Democratic Republic of Congo	DRC_ITU_OAE121_10_4_D0	microfilaria	PRJNA981587	REPLIG	Illumina Nextera DNA Flex	NextSeq 550	1767138	150	75	1509005	15848	0.0053	2912495	1055193	0.3291	1900307	15131.9	99.96	0.16	0.12	0.02	0
Democratic Republic of Congo	DRC_ITU_OAE121_10_5_D0	microfilaria	PRJNA981587	REPLIG	Illumina Nextera DNA Flex	NextSeq 550	1928689	150	75	1644460	18456	0.0056	3172115	1174400	0.3624	1904979	15493.8	100	0.09	0.06	0.02	0
Democratic Republic of Congo	DRC_ITU_OAE121_10_6_D0	microfilaria	PRJNA981587	REPLIG	Illumina Nextera DNA Flex	NextSeq 550	2287923	150	75	1946128	4179	0.0011	3878348	583173	0.2114	2987571	8361	99.52	2.79	1.53	0.02	0.02
Democratic Republic of Congo	DRC_ITU_OAE121_10_7_D0	microfilaria	PRJNA981587	REPLIG	Illumina Nextera DNA Flex	NextSeq 550	2399931	150	75	2037626	7223	0.0018	4041730	264901	0.1073	3566043	3032.82	98.57	4.68	3.5	0.04	0.03
Democratic Republic of Congo	DRC_ITU_OAE121_10_8_D0	microfilaria	PRJNA981587	REPLIG	Illumina Nextera DNA Flex	NextSeq 550	1913495	150	75	1592603	476692	0.1497	11074	1576	0.3036	6247	34.79	82.03	0	0	0	0
Democratic Republic of Congo	DRC_ITU_OAE121_11_1_D0	microfilaria	PRJNA981587	REPLIG	Illumina Nextera DNA Flex	NextSeq 550	2151479	150	75	1903053	2725	0.0007	3789229	1333274	0.3015	2588583	18863.2	99.99	0.58	0.44	0.02	0
Democratic Republic of Congo	DRC_ITU_OAE121_11_2_D0	microfilaria	PRJNA981587	REPLIG	Illumina Nextera DNA Flex	NextSeq 550	1537001	150	75	1372372	1794	0.0007	2735614	972519	0.2614	1945584	13921.1	100	0.52	0.31	0.1	0.02
Democratic Republic of Congo	DRC_ITU_OAE121_11_3_D0	microfilaria	PRJNA981587	REPLIG	Illumina Nextera DNA Flex	NextSeq 550	1473421	150	75	1274566	5695	0.0022	2501760	1259166	0.2887	1555062	12122	100	0.1	0.06	0.86	0.27
Democratic Republic of Congo	DRC_ITU_OAE121_11_4_D0	microfilaria	PRJNA981587	REPLIG	Illumina Nextera DNA Flex	NextSeq 550	1119534	150	75	969508	1375	0.0007	1924413	1125234	0.2784	1164790	9277.61	75.39	0	0	0	0
Democratic Republic of Congo	DRC_ITU_OAE121_11_5_D0	microfilaria	PRJNA981587	REPLIG	Illumina Nextera DNA Flex	NextSeq 550	1626425	150	75	1422837	41333	0.0145	2391184	1220745	0.2897	1573700	11790	99.66	0.17	0.06	0.04	0.08
Democratic Republic of Congo	DRC_ITU_OAE121_11_6_D0	microfilaria	PRJNA981587	REPLIG	Illumina Nextera DNA Flex	NextSeq 550	1277948	150	75	1106539	1559	0.0007	2198244	1269549	0.3305	1209902	9299.81	95.98	0.04	0.03	0	0
Democratic Republic of Congo	DRC_ITU_OAE121_11_7_D0	microfilaria	PRJNA981587	REPLIG	Illumina Nextera DNA Flex	NextSeq 550	1325111	150	75	1158220	17533	0.0076	2289242	1131582	0.2803	1487034	12254.2	99.99	0.01	0.01	0.02	0
Democratic Republic of Congo	DRC_ITU_OAE121_11_8_D0	microfilaria	PRJNA981587	REPLIG	Illumina Nextera DNA Flex	NextSeq 550	1274334	150	75	1110405	344069	0.1549	101854	19703	0.282	69631	115.18	88.55	0.06	0	0.07	0.17
Democratic Republic of Congo	DRC_ITU_OAE121_2_2_D0	microfilaria	PRJNA981587	REPLIG	Illumina Nextera DNA Flex	NextSeq 550	2072010	150	75	1762828	3074	0.0009	3512030	1279481	0.4061	1991578	16159.7	100	0.1	0.04	0.06	0
Democratic Republic of Congo	DRC_ITU_OAE121_2_3_D0	microfilaria	PRJNA981587	REPLIG	Illumina Nextera DNA Flex	NextSeq 550	2206074	150	75	1850570	2364	0.0006	3689596	1294729	0.4513	1895856	15540.3	100	0.07	0.04	0.04	0
Democratic Republic of Congo	DRC_ITU_OAE121_2_4_D0	microfilaria	PRJNA981587	REPLIG	Illumina Nextera DNA Flex	NextSeq 550	2645099	150	75	2194189	10556	0.0024	4363028	1284951	0.4658	2236350	15360.5	99.96	0.56	0.39	0.51	0.86
Democratic Republic of Congo	DRC_ITU_OAE121_2_8_D0	microfilaria	PRJNA981587	REPLIG	Illumina Nextera DNA Flex	NextSeq 550	1614187	150	75	1347432	7941	0.0029	2673345	626324	0.3059	1808144	8878.77	99.9	0.9	0.69	0.03	0
Democratic Republic of Congo	DRC_ITU_OAE121_3_1_D0	microfilaria	PRJNA981587	REPLIG	Illumina Nextera DNA Flex	NextSeq 550	2957002	150	75	2473633	28785	0.0058	4828055	1696867	0.4371	2591611	20423.8	100	0.23	0.14	0.06	0
Democratic Republic of Congo	DRC_ITU_OAE121_3_2_D0	microfilaria	PRJNA981587	REPLIG	Illumina Nextera DNA Flex	NextSeq 550	27458860	150	75	22947437	507550	0.0111	43456386	2015864	0.4411	23818105	13711.1	99.96	31.7	6.71	1.56	0.93
Democratic Republic of Congo	DRC_ITU_OAE121_3_2_D0	microfilaria	PRJNA981587	REPLIG	Illumina Nextera DNA Flex	NextSeq 550	2917574	150	75	2477599	58447	0.0118	4687913	220929	0.1878	3744551	2211.74	98.57	5.02	2.44	0.22	0.2
Democratic Republic of Congo	DRC_ITU_OAE121_3_7_D0	microfilaria	PRJNA981587	REPLIG	Illumina Nextera DNA Flex	NextSeq 550	2967040	150	75	2489658	4588	0.0009	4960234	1492378	0.3826	2905327	18135	100	1.07	0.8	0.09	0
Democratic Republic of Congo	DRC_ITU_OAE121_3_8_D0	microfilaria	PRJNA981587	REPLIG	Illumina Nextera DNA Flex	NextSeq 550	2313299	150	75	1997542	12077	0.003	3963552	1432579	0.4002	2277488	18708.6	100	0.13	0.09	0.02	0
Democratic Republic of Congo	DRC_ITU_OAE121_4_1_D0	microfilaria	PRJNA981587	REPLIG	Illumina Nextera DNA Flex	NextSeq 550	2526427	150	75	2154590	3101	0.0007	4295413	1116826	0.3743	2585537	13750	99.96	1.33	0.8	0.05	0
Democratic Republic of Congo	DRC_ITU_OAE121_4_2_D0	microfilaria	PRJNA981587	REPLIG	Illumina Nextera DNA Flex	NextSeq 550	2294666	150	75	2012317	469108	0.1166	1142326	398278	0.233	837376	6843.38	99.95	0.03	0.01	2.19	0.25
Democratic Republic of Congo	DRC_ITU_OAE121_4_6_D0	microfilaria	PRJNA981587	REPLIG	Illumina Nextera DNA Flex	NextSeq 550	1883562	150	75	1593297	9666	0.003	3166358	522545	0.2432	2318632	6956.5	99.96	2.16	1.14	0.34	0.05
Democratic Republic of Congo	DRC_ITU_OAE121_4_7_D0	microfilaria	PRJNA981587	REPLIG	Illumina Nextera DNA Flex	NextSeq 550	2012763	150	75	1739562	5686	0.0016	3459580	1190701	0.3558	2118525	17171	100	0.2	0.1	0.06	0
Democratic Republic of Congo	DRC_ITU_OAE121_5_1_D0	microfilaria	PRJNA981587	REPLIG	Illumina Nextera DNA Flex	NextSeq 550	2292229	150	75	1949060	6248	0.0016	3880351	574818	0.1975	2977627	7777.39	99.53	3.08	1.99	0.08	0.03
Democratic Republic of Congo	DRC_ITU_OAE121_5_2_D0	microfilaria	PRJNA981587	REPLIG	Illumina Nextera DNA Flex	NextSeq 550	2199970	150	75	1909579	2006	0.0005	3805622	1405348	0.3617	2308640	19320	100	0.09	0.04	0.01	0
Democratic Republic of Congo	DRC_ITU_OAE121_5_4_D0	microfilaria	PRJNA981587	REPLIG	Illumina Nextera DNA Flex	NextSeq 550	1917133	150	75	1664342	1972	0.0006	3314465	1334163	0.3252	2111229	17718.7	100	0.04	0.04	0.64	1.09
Democratic Republic of Congo	DRC_ITU_OAE121_5_7_D0	microfilaria	PRJNA981587	REPLIG	Illumina Nextera DNA Flex	NextSeq 550	2278665	150	75	1889715	793999	0.2101	69275	18034	0.0692	61021	360.62	97.66	0.02	0.01	0.36	0.22
Democratic Republic of Congo	DRC_ITU_OAE121_5_8_D0	microfilaria	PRJNA981587	REPLIG	Illumina Nextera DNA Flex	NextSeq 550	1882820	150	75	1637787	1888	0.0006	3264009	1427134	0.3375	1967894	16331	100	0.04	0.04	0	0
Democratic Republic of Congo	DRC_ITU_OAE121_6_1_D0	microfilaria	PRJNA981587	REPLIG	Illumina Nextera DNA Flex	NextSeq 550	3177729	150	75	2665937	6405	0.0012	5310893	987291	0.2245	4003362	13394.6	99.99	3.46	2.86	1.4	0.9
Democratic Republic of Congo	DRC_ITU_OAE121_6_2_D0	microfilaria	PRJNA981587	REPLIG	Illumina Nextera DNA Flex	NextSeq 550	2830670	150	75	2470262	126837	0.0257	4045210	1539991	0.3867	2326235	19669.1	100	0.03	0.02	0.29	0.22
Democratic Republic of Congo	DRC_ITU_OAE121_6_8_D0	microfilaria	PRJNA981587	REPLIG	Illumina Nextera DNA Flex	NextSeq 550	2297143	150	75	1957001	2656	0.0007	3895061	1638718	0.3893	2316466	18927.3	99.96	0.06	0.04	0.47	0.45
Democratic Republic of Congo	DRC_ITU_OAE121_7_1_D0	microfilaria	PRJNA981587	REPLIG	Illumina Nextera DNA Flex	NextSeq 550	1895835	150	75	1652168	12786	0.0039	3230826	1232207	0.3133	2100097	17304.8	100	0.1	0.07	0.01	0.02
Democratic Republic of Congo	DRC_ITU_OAE121_7_2_D0	microfilaria	PRJNA981587	REPLIG	Illumina Nextera DNA Flex	NextSeq 550	2338736	150	75	2066110	5934	0.0014	4091075	1634783	0.4033	2262970	18496.7	100	0.12	0.07	0	0
Democratic Republic of Congo	DRC_ITU_OAE121_7_7_D0	microfilaria	PRJNA981587	REPLIG	Illumina Nextera DNA Flex	NextSeq 550	1966289	150	75	1707598	2086	0.0006	3400173	1224237	0.3038	2243873	17436.5	100	0.29	0.26	0.01	0.02
Democratic Republic of Congo	DRC_ITU_OAE121_7_8_D0	microfilaria	PRJNA981587	REPLIG	Illumina Nextera DNA Flex	NextSeq 550	2144999	150	75	1848626	1884	0.0005	3685962	1524542	0.3398	2340849	19743.4	100	0.02	0.02	0.32	0.16
Democratic Republic of Congo	DRC_ITU_OAE121_8_1_D0	microfilaria	PRJNA981587	REPLIG	Illumina Nextera DNA Flex	NextSeq 550	1933544	150	75	1678607	88013	0.0262	2611168	1095939	0.288	1734386	14508.6	100	0.03	0.02	0	0
Democratic Republic of Congo	DRC_ITU_OAE121_8_2_D0	microfilaria	PRJNA981587	REPLIG	Illumina Nextera DNA Flex	NextSeq 550	1753622	150	75	1542507	3308	0.0011	3069813	1215627	0.3988	1696028	14169.1	100	0.04	0.04	0	0
Democratic Republic of Congo	DRC_ITU_OAE121_8_4_D0	microfilaria	PRJNA981587	REPLIG	Illumina Nextera DNA Flex	NextSeq 550	2116772	150	75	1838898	2579	0.0007	3664233	1300692	0.3162	2404663	17947.9	100	0.46	0.26	0.04	0.02
Democratic Republic of Congo	DRC_ITU_OAE121_8_5_D0	microfilaria	PRJNA981587	REPLIG	Illumina Nextera DNA Flex	NextSeq 550	1787833	150	75	1602171	2758	0.0009	3191648	1242661	0.3847	1846341	15436.5	99.99	0.08	0.04	0.02	0
Democratic Republic of Congo	DRC_ITU_OAE121_8_6_D0	microfilaria	PRJNA981587	REPLIG	Illumina Nextera DNA Flex	NextSeq 550	1765123	150	75	1560562	3790	0.0012	3105674	1233096	0.3645	1829418	15096.2	100	0.09	0.02	0.03	0.02
Democratic Republic of Congo	DRC_ITU_OAE121_8_7_D0	microfilaria	PRJNA981587	REPLIG	Illumina Nextera DNA Flex	NextSeq 550	2074415	150	75	1751575	2403	0.0007	3489691	1191010	0.3147	2272058	15936.4	100	0.55	0.44	0.17	0.09
Democratic Republic of Congo	DRC_ITU_OAE121_8_8_D0	microfilaria	PRJNA981587	REPLIG	Illumina Nextera DNA Flex	NextSeq 550	1749406	150	75	1543063	2734	0.0009	3067095	1241714	0.3539	1834480	15502.1	100	0.02	0.01	0	0
Democratic Republic of Congo	DRC_ITU_OAE121_9_1_D0	microfilaria	PRJNA981587	REPLIG	Illumina Nextera DNA Flex	NextSeq 550	2092732	150	75	1782297	334452	0.0938	1089729	411808	0.2547	782050	6326.87	99.93	0.04	0.04	1.72	1.25
Democratic Republic of Congo	DRC_ITU_OAE121_9_4_D0	microfilaria	PRJNA981587	REPLIG	Illumina Nextera DNA Flex	NextSeq 550	2136355	150	75	1849219	132377	0.0358	2815183	1109717	0.3635	1704631	14117.2	100	0.05	0.04	0	0
Democratic Republic of Congo	DRC_ITU_OAE121_9_5_D0	microfilaria	PRJNA981587	REPLIG	Illumina Nextera DNA Flex	NextSeq 550	2611870	150	75	2212257	143337	0.0324	4241495	926265	0.2761	2975209	11824.5	100	2.19	1.5	1.39	2.04
Democratic Republic of Congo	DRC_ITU_OAE121_9_6_D0	microfilaria	PRJNA981587	REPLIG	Illumina Nextera DNA Flex	NextSeq 550	2250462	150	75	1935167	2463	0.0006	3855568	1486584	0.3834	2231617	18686.1	100	0.03	0.03	0.06	0.04
Democratic Republic of Congo	DRC_ITU_OAE121_9_7_D0	microfilaria	PRJNA981587	REPLIG	Illumina Nextera DNA Flex	NextSeq 550	2134987	150	75	1845051	2857	0.0008	3677058	1330600	0.4128	2038340	16723.1	100	0.1	0.05	0.02	0.01
Democratic Republic of Congo	DRC_ITU_OAE185_1_D0	microfilaria	PRJNA981587	REPLIG	Illumina Nextera DNA Flex	iSeq 100	309675	150	125	243016	2906	0.006	475765	79573	0.0206	453810	495.28	98.13	0.59	0.03	0.17	0
Democratic Republic of Congo	DRC_ITU_OAE185_1_D0	microfilaria	PRJNA981587	REPLIG	Illumina Nextera DNA Flex	NextSeq 550	23966706	150	125	18221889	158688	0.0044	35730972	5774447	0.0853	31909287	24015.2	99.98	43.11	62.78	14.03	23.01
Democratic Republic of Congo	DRC_ITU_OAE185_1_D0	microfilaria	PRJNA981587	REPLIG	Illumina Nextera DNA Flex	MiSeq	1352891	300	200	654333	36120	0.0276	1252046	372819	0.0116	1206243	1285.04	97.64	2.79	1.4	1.3	0.14
Democratic Republic of Congo	DRC_ITU_OAE185_1_D0	microfilaria	PRJNA981587	REPLIG	Illumina Nextera DNA Flex	NextSeq 550	14959647	150	125	11709842	37433	0.0016	23312531	3398465	0.0648	21360399	13487.1	99.84	28.96	41.04	6.82	9.63
Democratic Republic of Congo	DRC_ITU_OAE185_2_D0	microfilaria	PRJNA981587	REPLIG	Illumina Nextera DNA Flex	MiSeq	1024766	300	200	485077	379382	0.3911	300110	255450	0.0429	218145	1474.43	97.58	0.21	0.03	0.3	0.2
Democratic Republic of Congo	DRC_ITU_OAE195_1_D0	microfilaria	PRJNA981587	REPLIG	Illumina Nextera DNA Flex	iSeq 100	328481	150	125	268212	876	0.0016	533937	80395	0.0181	513271	424.17	97.49	0.68	0.04	0.16	0
Democratic Republic of Congo	DRC_ITU_OAE195_1_D0	microfilaria	PRJNA981587	REPLIG	Illumina Nextera DNA Flex	NextSeq 550	23926537	150	125	18284946	56544	0.0015	36413308	5276223	0.0785	32881001	19832.7	99.85	44.78	52.58	10.65	15.27
Democratic Republic of Congo	DRC_ITU_OAE195_1_D0	microfilaria	PRJNA981587	REPLIG	Illumina Nextera DNA Flex	MiSeq	1376233	300	200	594204	2271	0.0019	1183806	303564	0.0086	1149627	720.38	97.13	2.71	2.2	0.9	0.28
Democratic Republic of Congo	DRC_ITU_OAE195_1_D0	microfilaria	PRJNA981587	REPLIG	Illumina Nextera DNA Flex	NextSeq 550	15241815	150	125	11420599	102928	0.0045	22389430	3640966	0.0713	20295966	16156.4	99.99	27.23	46.06	8.79	11.9
Democratic Republic of Congo	DRC_ITU_OAE195_2_D0	microfilaria	PRJNA981587	REPLIG	Illumina Nextera DNA Flex	MiSeq	1202665	300	200	668531	891	0.0007	1334678	331910	0.0069	1303112	807.26	97.17	3.23	2.3	0.62	0.15
Democratic Republic of Congo	DRC_ITU_OAE203_1_2_D0	microfilaria	PRJNA981587	REPLIG	Illumina Nextera DNA Flex	NextSeq 550	20322680	150	75	16980428	294496	0.0087	32466266	1163355	0.3008	22522315	2768.17	98.57	32.54	12	7.58	5.82
Democratic Republic of Congo	DRC_ITU_OAE203_1_2_D0	microfilaria	PRJNA981587	REPLIG	Illumina Nextera DNA Flex	NextSeq 550	1955340	150	75	1659287	30096	0.0091	3171176	115309	0.1091	2806775	327.89	97.16	4.09	2.96	0.79	1.28
Democratic Republic of Congo	DRC_ITU_OAE203_1_3_D0	microfilaria	PRJNA981587	REPLIG	Illumina Nextera DNA Flex	NextSeq 550	1600932	150	75	1366063	1055662	0.3864	42499	2415	0.1629	28147	58.54	85.16	0.01	0	0	0
Democratic Republic of Congo	DRC_ITU_OAE203_1_5_D0	microfilaria	PRJNA981587	REPLIG	Illumina Nextera DNA Flex	NextSeq 550	1890803	150	75	1615268	18422	0.0057	3193377	91338	0.2497	2380394	112.89	97.05	3.5	1.54	0.11	0
Democratic Republic of Congo	DRC_ITU_OAE203_1_6_D0	microfilaria	PRJNA981587	REPLIG	Illumina Nextera DNA Flex	NextSeq 550	4969752	150	75	4237889	57340	0.0068	8388756	771261	0.0956	7438539	8353.67	99.64	9.15	10.56	5.84	6.46
Democratic Republic of Congo	DRC_ITU_OAE203_1_6_D0	microfilaria	PRJNA981587	REPLIG	Illumina Nextera DNA Flex	NextSeq 550	2227433	150	75	1927122	25643	0.0067	3815295	356378	0.071	3474262	4420.15	99.19	4.2	3.43	2.73	3.67
Democratic Republic of Congo	DRC_ITU_OAE203_1_7_D0	microfilaria	PRJNA981587	REPLIG	Illumina Nextera DNA Flex	NextSeq 550	1712488	150	75	1510808	485131	0.1606	51208	9854	0.0931	44028	232.88	97.67	0.02	0.01	0.03	0.01
Democratic Republic of Congo	DRC_ITU_OAE203_2_1_D0	microfilaria	PRJNA981587	REPLIG	Illumina Nextera DNA Flex	NextSeq 550	2105040	150	75	1823489	13143	0.0036	3615665	1395544	0.3793	2117469	17665.3	100	0.06	0.04	0.17	0.09
Democratic Republic of Congo	DRC_ITU_OAE203_2_2_D0	microfilaria	PRJNA981587	REPLIG	Illumina Nextera DNA Flex	NextSeq 550	1278917	150	75	1115336	127939	0.0574	1987924	441332	0.175	1576428	7732.32	99.99	1.04	0.65	0.28	0.01
Democratic Republic of Congo	DRC_ITU_OAE203_3_2_D0	microfilaria	PRJNA981587	REPLIG	Illumina Nextera DNA Flex	NextSeq 550	1619057	150	75	1449736	1480	0.0005	2889106	1245038	0.2697	1977039	15424.7	100	0.2	0.19	0.25	0.29
Democratic Republic of Congo	DRC_ITU_OAE209_1_1_D0	microfilaria	PRJNA981587	REPLIG	Illumina Nextera DNA Flex	NextSeq 550	2737380	150	75	2209585	18564	0.0042	4363530	1501863	0.4336	2342120	18419.9	100	0.18	0.14	1.34	1.64
Democratic Republic of Congo	DRC_ITU_OAE209_1_2_D0	microfilaria	PRJNA981587	REPLIG	Illumina Nextera DNA Flex	NextSeq 550	2565988	150	75	2147839	5139	0.0012	4279240	548533	0.2466	3155789	7256.46	99.53	3.25	1.88	0.03	0
Democratic Republic of Congo	DRC_ITU_OAE209_1_3_D0	microfilaria	PRJNA981587	REPLIG	Illumina Nextera DNA Flex	NextSeq 550	2028349	150	75	1745140	8023	0.0023	3466393	1236546	0.3992	1959386	16503.6	100	0.03	0.02	1.01	0.45
Democratic Republic of Congo	DRC_ITU_OAE209_1_6_D0	microfilaria	PRJNA981587	REPLIG	Illumina Nextera DNA Flex	NextSeq 550	2008632	150	75	1762078	568278	0.1613	67439	19226	0.1006	56642	433.84	99.51	0.01	0	0.15	0.2
Democratic Republic of Congo	DRC_ITU_OAE209_1_7_D0	microfilaria	PRJNA981587	REPLIG	Illumina Nextera DNA Flex	NextSeq 550	2374172	150	75	1903515	870711	0.2287	1293775	422740	0.2967	858440	6666.45	99.96	0.11	0.07	0.01	0
Democratic Republic of Congo	DRC_ITU_OAE209_10_1_D0	microfilaria	PRJNA981587	REPLIG	Illumina Nextera DNA Flex	NextSeq 550	2067571	150	75	1825448	176100	0.0482	1689964	360711	0.2241	1278186	10041.4	97.65	0.02	0.01	0	0
Democratic Republic of Congo	DRC_ITU_OAE209_10_2_D0	microfilaria	PRJNA981587	REPLIG	Illumina Nextera DNA Flex	NextSeq 550	1336252	150	75	1183220	9331	0.0039	2344094	926260	0.3608	1383367	12343	100	0.4	0.37	0	0
Democratic Republic of Congo	DRC_ITU_OAE209_10_3_D0	microfilaria	PRJNA981587	REPLIG	Illumina Nextera DNA Flex	NextSeq 550	1053925	150	75	916365	1122	0.0006	1823384	857125	0.2974	1165411	10190.3	100	0.02	0.02	0.03	0
Democratic Republic of Congo	DRC_ITU_OAE209_10_4_D0	microfilaria	PRJNA981587	REPLIG	Illumina Nextera DNA Flex	NextSeq 550	1923767	150	75	1671508	1816	0.0005	3329763	1435272	0.3705	1934833	13055.3	100	0.04	0.04	0	0
Democratic Republic of Congo	DRC_ITU_OAE209_10_5_D0	microfilaria	PRJNA981587	REPLIG	Illumina Nextera DNA Flex	NextSeq 550	1370976	150	75	1220297	1235	0.0005	2432034	1076650	0.2917	1633268	14750.2	100	0.02	0.02	0.04	0.05
Democratic Republic of Congo	DRC_ITU_OAE209_10_6_D0	microfilaria	PRJNA981587	REPLIG	Illumina Nextera DNA Flex	NextSeq 550	1375383	150	75	1225476	1120	0.0005	2443108	1055462	0.2981	1601160	268.07	97.61	0	0	0	0
Democratic Republic of Congo	DRC_ITU_OAE209_10_7_D0	microfilaria	PRJNA981587	REPLIG	Illumina Nextera DNA Flex	NextSeq 550	1493145	150	75	1322695	1474	0.0006	2639294	370221	0.493	1329105	13626.9	100	0.15	0.16	2.6	4.22
Democratic Republic of Congo	DRC_ITU_OAE209_2_1_D0	microfilaria	PRJNA981587	REPLIG	Illumina Nextera DNA Flex	NextSeq 550	2256563	150	75	1931637	64377	0.0167	3662379	1206416	0.3947	2119546	17238.3	100	0.19	0.09	0.02	0
Democratic Republic of Congo	DRC_ITU_OAE209_2_2_D0	microfilaria	PRJNA981587	REPLIG	Illumina Nextera DNA Flex	NextSeq 550	1430183	150	75	1261867	279598	0.1108	500300	133595	0.118	427711	2625.76	99.93	0.17	0.15	0.04	0
Democratic Republic of Congo	DRC_ITU_OAE209_2_4_D0	microfilaria	PRJNA981587	REPLIG	Illumina Nextera DNA Flex	NextSeq 550	323000	150	75	282686	12255	0.0217	489439	93100	0.132	414013	1905.89	99.9	0.3	0.11	0.04	0
Democratic Republic of Congo	DRC_ITU_OAE209_2_5_D0	microfilaria	PRJNA981587	REPLIG	Illumina Nextera DNA Flex	NextSeq 550	15512467	150	75	12386739	3512622	0.1418	19593518	1756285	0.2589	14172083	17356.4	99.98	17.7	10.26	1.3	1.58
Democratic Republic of Congo	DRC_ITU_OAE209_2_5_D0	microfilaria	PRJNA981587	REPLIG	Illumina Nextera DNA Flex	NextSeq 550	2307464	150	75	1887288	566964	0.1502	2955547	270448	0.1172	2550894	3722.46	98.97	3.11	2.42	0.2	0
Democratic Republic of Congo	DRC_ITU_OAE209_2_7_D0	microfilaria	PRJNA981587	REPLIG	Illumina Nextera DNA Flex	NextSeq 550	2086372	150	75	1777787	1311595	0.3689	154276	30027	0.043	142752	655.39	99.7	0.1	0	0.04	0
Democratic Republic of Congo	DRC_ITU_OAE209_2_8_D0	microfilaria	PRJNA981587	REPLIG	Illumina Nextera DNA Flex	NextSeq 550	12116061	150	75	10532668	411773	0.0195	20473358	3095678	0.3224	13460344	35438	100	13.6	8.34	11.57	14.19
Democratic Republic of Congo	DRC_ITU_OAE209_2_8_D0	microfilaria	PRJNA981587	REPLIG	Illumina Nextera DNA Flex	NextSeq 550	1542978	150	75	1359915	53124	0.0195	2643968	410060	0.1491	2186806	6860.93	99.98	2.06	1.26	1.53	1.11
Democratic Republic of Congo	DRC_ITU_OAE209_3_1_D0	microfilaria	PRJNA981587	REPLIG	Illumina Nextera DNA Flex	NextSeq 550	2109604	150	75	1826729	714490	0.1956	1576913	519794	0.3343	1001028	7128.03	99.94	0.24	0.03	0.01	0
Democratic Republic of Congo	DRC_ITU_OAE209_3_2_D0	microfilaria	PRJNA981587	REPLIG	Illumina Nextera DNA Flex	NextSeq 550	1639715	150	75	1428080	129669	0.0454	1957247	73856	0.0991	1735588	475.74	97.92	2.11	2.02	0.05	0.08
Democratic Republic of Congo	DRC_ITU_OAE209_3_5_D0	microfilaria	PRJNA981587	REPLIG	Illumina Nextera DNA Flex	NextSeq 550	2284262	150	75	1999517	724503	0.1812	67403	19097	0.1332	54139	428.45	99.39	0	0	0.02	0
Democratic Republic of Congo	DRC_ITU_OAE209_4_1_D0	microfilaria	PRJNA981587	REPLIG	Illumina Nextera DNA Flex	NextSeq 550	2644468	150	75	2051648	1185075	0.2888	1076210	97455	0.0949	953406	1511.22	97.8	1.08	1.03	0.15	0.07
Democratic Republic of Congo	DRC_ITU_OAE209_4_3_D0	microfilaria	PRJNA981587	REPLIG	Illumina Nextera DNA Flex	NextSeq 550	1554402	150	75	1356317	2648	0.001	3611499	912464	0.2934	1796263	14213.2	100	0.26	0.12	0.08	0
Democratic Republic of Congo	DRC_ITU_OAE209_4_5_D0	microfilaria	PRJNA981587	REPLIG	Illumina Nextera DNA Flex	NextSeq 550	1509069	150	75	1300805	2910	0.0011	2585656	986056	0.2829	1779740	14623.4	99.96	0.13	0.07	0.08	0
Democratic Republic of Congo	DRC_ITU_OAE209_4_7_D0	microfilaria	PRJNA981587	REPLIG	Illumina Nextera DNA Flex	NextSeq 550	1853043	150	75	1557688	522269	0.1676	282116	100381	0.1588	226452	1860.85	99.61	0.01	0	0	0
Democratic Republic of Congo	DRC_ITU_OAE209_4_8_D0	microfilaria	PRJNA981587	REPLIG	Illumina Nextera DNA Flex	NextSeq 550	2400444	150	75	2093070	2518	0.0006	4176065	641378	0.2901	2891072	9193.16	99.9	2.74	1.44	0.3	0.15
Democratic Republic of Congo	DRC_ITU_OAE209_5_1_D0	microfilaria	PRJNA981587	REPLIG	Illumina Nextera DNA Flex	NextSeq 550	1496021	150	75	1328692	26614	0.01	2623051	1253985	0.3463	1606589	4671.75	99.9	1	0.4	0.02	0
Democratic Republic of Congo	DRC_ITU_OAE209_5_2_D0	microfilaria	PRJNA981587	REPLIG	Illumina Nextera DNA Flex	NextSeq 550	1310417	150	75	1153070	280433	0.1216	812380	348738	0.2556	554617	11143.9	100	0.1	0.03	0.02	0
Democratic Republic of Congo	DRC_ITU_OAE209_5_3_D0	microfilaria	PRJNA981587	REPLIG	Illumina Nextera DNA Flex	NextSeq 550	1538433	150	75	1371020	2459	0.0009	2732630	755813	0.3213	1774613	9398.12	99.06	0.02	0.02	0	0
Democratic Republic of Congo	DRC_ITU_OAE209_5_4_D0	microfilaria	PRJNA981587	REPLIG	Illumina Nextera DNA Flex	NextSeq 550	1586328	150	75	1355982	267845	0.0988	269477	118366	0.1555	203149	15787.8	100	0.06	0.05	0.01	0
Democratic Republic of Congo	DRC_ITU_OAE209_5_5_D0	microfilaria	PRJNA981587	REPLIG	Illumina Nextera DNA Flex	NextSeq 550	2235629	150	75	1964226	2662	0.0007	3909863	1774681	0.3834	2221113	13489.5	100	0.05	0.03	0.03	0
Democratic Republic of Congo	DRC_ITU_OAE209_5_6_D0	microfilaria	PRJNA981587	REPLIG	Illumina Nextera DNA Flex	NextSeq 550	3217862	150	75	2835935	7226	0.0013	5648031	2393614	0.3753	3289783	13454.6	100	0.02	0.02	0	0
Democratic Republic of Congo	DRC_ITU_OAE209_5_7_D0	microfilaria	PRJNA981587	REPLIG	Illumina Nextera DNA Flex	NextSeq 550	2067183	150	75	1841278	3957	0.0011	3666151	1488353	0.3883	2160465	4916.83	99.57	1.17	0.33	0.06	0.02
Democratic Republic of Congo	DRC_ITU_OAE209_5_8_D0	microfilaria	PRJNA981587	REPLIG	Illumina Nextera DNA Flex	NextSeq 550	1536847	150	75	1350686	8938	0.0033	2632509	1378729	0.3083	1751318	13144.3	91.75	0.03	0.02	0	0
Democratic Republic of Congo	DRC_ITU_OAE209_6_1_D0	microfilaria	PRJNA981587	REPLIG	Illumina Nextera DNA Flex	NextSeq 550	1729963	150	75	1555935	175898	0.0565	2931453	238782	0.4514	1555404	4560.59	99.88	0.02	0.01	0.18	0.11
Democratic Republic of Congo	DRC_ITU_OAE209_6_2_D0	microfilaria	PRJNA981587	REPLIG	Illumina Nextera DNA Flex	NextSeq 550	1899972	150	75	1695378	1758	0.0005	3379216	1378980	0.3651	2056091	8916.86	99.99	0.66	0.68	36.64	0.61
Democratic Republic of Congo	DRC_ITU_OAE209_6_3_D0	microfilaria	PRJNA981587	REPLIG	Illumina Nextera DNA Flex	NextSeq 550	2428708	150	75	2111606	6348	0.0015	4180553	1857709	0.4162	2147003	1641.18	99.75	0.01	0.01	0.1	0.21
Democratic Republic of Congo	DRC_ITU_OAE209_6_4_D0	microfilaria	PRJNA981587	REPLIG	Illumina Nextera DNA Flex	NextSeq 550	1315961	150	75	1162827	1143	0.0005	2316860	1145059	0.2819	1563900	16142.1	100	0.38	0.05	0.07	0.21
Democratic Republic of Congo	DRC_ITU_OAE209_6_5_D0	microfilaria	PRJNA981587	REPLIG	Illumina Nextera DNA Flex	NextSeq 550	1885547	150	75	1658405	1928	0.0006	3302353	1394409	0.3522	2041185	27256.4	100	0.08	0.02	1.46	0.48
Democratic Republic of Congo	DRC_ITU_OAE209_6_6_D0	microfilaria	PRJNA981587	REPLIG	Illumina Nextera DNA Flex	NextSeq 550	1861849	150	75	1601736	2956	0.0009	3189566	1328226	0.3633	1868292	18038.4	99.92	0.06	0.02	0.02	0
Democratic Republic of Congo	DRC_ITU_OAE209_6_8_D0	microfilaria	PRJNA981587	REPLIG	Illumina Nextera DNA Flex	NextSeq 550	935558	150	75	806687	1155	0.0007	1606818	711910	0.2619	1109985	13976.6	100	0.05	0.05	0	0
Democratic Republic of Congo	DRC_ITU_OAE209_7_2_D0	microfilaria	PRJNA981587	REPLIG	Illumina Nextera DNA Flex	NextSeq 550	2030181	150	75	1799615	1852	0.0005	3587297	982619	0.2995	2388850	17225.1	100	0.05	0.05	0.12	0.12
Democratic Republic of Congo	DRC_ITU_OAE209_7_3_D0	microfilaria	PRJNA981587	REPLIG	Illumina Nextera DNA Flex	NextSeq 550	1410762	150	75	1236908	283874	0.1148	425688	201754	0.1765	328581	16926.8	100	0.12	0.05	0.12	0.25
Democratic Republic of Congo	DRC_ITU_OAE209_7_4_D0	microfilaria	PRJNA981587	REPLIG	Illumina Nextera DNA Flex	NextSeq 550	1256416	150	75	1113956	74874	0.0336	1288602	424822	0.1812	1014691	12719.9	100	0.03	0.02	0	0
Democratic Republic of Congo	DRC_ITU_OAE209_7_5_D0	microfilaria	PRJNA981587	REPLIG	Illumina Nextera DNA Flex	NextSeq 550	1319772	150	75	1172081	91817	0.0392	1804057	128898	0.144	1497871	16746.1	100	0.07	0.03	0.01	0
Democratic Republic of Congo	DRC_ITU_OAE209_7_6_D0	microfilaria	PRJNA981587	REPLIG	Illumina Nextera DNA Flex	NextSeq 550	1618656	150	75	1430797	3550	0.0012	2842962	1309253	0.3624	1640583	15369.4	100	0.04	0.04	0	0
Democratic Republic of Congo	DRC_ITU_OAE209_7_8_D0	microfilaria	PRJNA981587	REPLIG	Illumina Nextera DNA Flex	NextSeq 550	1425241	150	75	1268515	134334	0.0529	1144423	502067	0.1899	875582	9122.1	100	0.03	0.02	0.01	0
Democratic Republic of Congo	DRC_ITU_OAE209_8_1_D0	microfilaria	PRJNA981587	REPLIG	Illumina Nextera DNA Flex	NextSeq 550	1443468	150	75	1249541	10934	0.0044	2450016	172102	0.3875	1484911	17882.8	99.99	0.33	0.22	0	0
Democratic Republic of Congo	DRC_ITU_OAE209_8_2_D0	microfilaria	PRJNA981587	REPLIG	Illumina Nextera DNA Flex	NextSeq 550	1366740	150	75	1202527	21828	0.0091	2361822	1000968	0.3015	1520266	10662.1	100	1.47	0.64	0.03	0.04
Democratic Republic of Congo	DRC_ITU_OAE209_8_4_D0	microfilaria	PRJNA981587	REPLIG	Illumina Nextera DNA Flex	NextSeq 550	1574396	150	75	1386827	1579	0.0006	2760930	1259624	0.3066	1781491	6095.86	99.97	0.42	0.29	1.36	0.24
Democratic Republic of Congo	DRC_ITU_OAE209_8_5_D0	microfilaria	PRJNA981587	REPLIG	Illumina Nextera DNA Flex	NextSeq 550	1258597	150	75	1118197	1229	0.0005	2228358	1049483	0.2397	1594317	725.16	92	2.07	1.21	3.25	1.11
Democratic Republic of Congo	DRC_ITU_OAE209_8_7_D0	microfilaria	PRJNA981587	REPLIG	Illumina Nextera DNA Flex	NextSeq 550	1316080	150	75	1167431	132996	0.057	753269	348120	0.1567	607263	13254.6	100	0.06	0.04	0.06	0
Democratic Republic of Congo	DRC_ITU_OAE209_9_1_D0	microfilaria	PRJNA981587	REPLIG	Illumina Nextera DNA Flex	NextSeq 550	1723567	150	75	1523419	7685	0.0025	3024115	1461208	0.304	1939453	6431.34	99.96	0.16	0.06	0	0
Democratic Republic of Congo	DRC_ITU_OAE209_9_2_D0	microfilaria	PRJNA981587	REPLIG	Illumina Nextera DNA Flex	NextSeq 550	1129133	150	75	1014325	835	0.0004	2024700	697929	0.421	1160379	960.04	98.57	2.03	0.65	0.05	0.08
Democratic Republic of Congo	DRC_ITU_OAE209_9_3_D0	microfilaria	PRJNA981587	REPLIG	Illumina Nextera DNA Flex	NextSeq 550	1403423	150	75	1247391	2208	0.0009	2481838	935417	0.2706	1718246	12056.2	100	0.12	0.1	0.01	0
Democratic Republic of Congo	DRC_ITU_OAE209_9_4_D0	microfilaria	PRJNA981587	REPLIG	Illumina Nextera DNA Flex	NextSeq 550	1181223	150	75	1049348	2206	0.0011	2082697	1065950	0.3284	1262993	2748.1	94.07	0.01	0.01	0.92	0.24
Democratic Republic of Congo	DRC_ITU_OAE209_9_5_D0	microfilaria	PRJNA981587	REPLIG	Illumina Nextera DNA Flex	NextSeq 550	1243316	150	75	1103455	1569	0.0007	2196387	990079	0.2504	1562686	14698.3	100	0.03	0.03	0.01	0
Democratic Republic of Congo	DRC_ITU_OAE209_9_6_D0	microfilaria	PRJNA981587	REPLIG	Illumina Nextera DNA Flex	NextSeq 550	1434802	150	75	1272345	1210	0.0005	2536078	1144160	0.2781	1757194	13303	100	0.02	0.01	0	0
Democratic Republic of Congo	DRC_ITU_OAE209_9_7_D0	microfilaria	PRJNA981587	REPLIG	Illumina Nextera DNA Flex	NextSeq 550	1323532	150	75	1161249	135262	0.0582	37252	15312	0.0468	33166	4990.6	99.96	0.01	0	0.72	0.23
Democratic Republic of Congo	DRC_ITU_OAE209_9_8_D0	microfilaria	PRJNA981587	REPLIG	Illumina Nextera DNA Flex	NextSeq 550	1378551	150	75	1225385	1311	0.0005	2441068	1037436	0.24	1733005	15971.6	100	0.02	0.02	0	0
Democratic Republic of Congo	DRC_ITU_OAE228_1_1_D0	microfilaria	PRJNA981587	REPLIG	Illumina Nextera DNA Flex	NextSeq 550	959310	150	75	750335	1468450	0.9785	22889	8445	0.0521	17073	103.78	82.33	0	0	0	0
Democratic Republic of Congo	DRC_ITU_OAE228_1_2_D0	microfilaria	PRJNA981587	REPLIG	Illumina Nextera DNA Flex	NextSeq 550	1020081	150	75	789059	1279966	0.8111	226254	61963	0.2116	160264	968.98	98.18	0.01	0.01	0.04	0.04
Democratic Republic of Congo	DRC_ITU_OAE228_1_3_D0	microfilaria	PRJNA981587	REPLIG	Illumina Nextera DNA Flex	NextSeq 550	1275010	150	75	1094064	722115	0.33	14200	3250	0.1482	10633	55.28	93.22	0	0	0	0
Democratic Republic of Congo	DRC_ITU_OAE228_1_6_D0	microfilaria	PRJNA981587	REPLIG	Illumina Nextera DNA Flex	NextSeq 550	3097591	150	75	2671555	2913139	0.5452	124598	6370	0.344	64338	85.3	96.26	0.01	0.01	0.17	0.06
Democratic Republic of Congo	DRC_ITU_OAE228_2_1_D0	microfilaria	PRJNA981587	REPLIG	Illumina Nextera DNA Flex	NextSeq 550	1326697	150	75	1179354	6966	0.003	2343092	982098	0.3071	1506224	10156.3	99.97	0.41	0.08	0	0
Democratic Republic of Congo	DRC_ITU_OAE228_2_3_D0	microfilaria	PRJNA981587	REPLIG	Illumina Nextera DNA Flex	NextSeq 550	1274250	150	75	1141031	31424	0.0138	1973148	875981	0.2977	1325810	11183.9	99.96	0	0	0	0
Democratic Republic of Congo	DRC_ITU_OAE228_2_6_D0	microfilaria	PRJNA981587	REPLIG	Illumina Nextera DNA Flex	NextSeq 550	1411774	150	75	1253350	2074	0.0008	2495242	1057643	0.3472	1543951	12887.7	99.98	0.02	0.01	0	0
Democratic Republic of Congo	DRC_ITU_OAE228_2_7_D0	microfilaria	PRJNA981587	REPLIG	Illumina Nextera DNA Flex	NextSeq 550	1840513	150	75	1623414	1908	0.0006	3235382	1622459	0.4484	1767568	14439.6	96.04	0	0	0	0
Democratic Republic of Congo	DRC_ITU_OAE228_2_8_D0	microfilaria	PRJNA981587	REPLIG	Illumina Nextera DNA Flex	NextSeq 550	1672558	150	75	1452481	1637	0.0006	2899228	1619940	0.7818	623219	5312.05	97.1	0	0	0.01	0.01
Democratic Republic of Congo	DRC_ITU_OAE304_1_1_D0	microfilaria	PRJNA981587	REPLIG	Illumina Nextera DNA Flex	NextSeq 550	1910527	150	75	1623400	73213	0.0225	3150763	990890	0.3452	1958428	14089.2	100	0.45	0.32	0.19	0.02
Democratic Republic of Congo	DRC_ITU_OAE304_1_2_D0	microfilaria	PRJNA981587	REPLIG	Illumina Nextera DNA Flex	NextSeq 550	1868869	150	75	1587707	453629	0.1429	1172738	348636	0.2562	840240	6401.37	99.93	0.14	0.06	0.07	0.04
Democratic Republic of Congo	DRC_ITU_OAE304_1_6_D0	microfilaria	PRJNA981587	REPLIG	Illumina Nextera DNA Flex	NextSeq 550	1408563	150	75	1186051	13443	0.0057	2342372	737483	0.3194	1507386	11816.7	100	0.21	0.09	0.06	0
Democratic Republic of Congo	DRC_ITU_OAE369_1_1_D0	microfilaria	PRJNA981587	REPLIG	Illumina Nextera DNA Flex	NextSeq 550	15951899	150	75	13432381	2362295	0.0879	20708162	1553774	0.2614	14792393	12867.5	100	17.32	12.38	14.08	8.06
Democratic Republic of Congo	DRC_ITU_OAE369_1_1_D0	microfilaria	PRJNA981587	REPLIG	Illumina Nextera DNA Flex	NextSeq 550	1901935	150	75	1628772	295560	0.0907	2505760	191328	0.1159	2140200	2237.78	98.57	2.39	1.92	1.81	2.76
Democratic Republic of Congo	DRC_ITU_OAE369_1_2_D0	microfilaria	PRJNA981587	REPLIG	Illumina Nextera DNA Flex	NextSeq 550	10667961	150	75	9056918	2046021	0.113	14394798	1530509	0.197	11323368	17550	99.96	13.37	12.4	3.49	3.74
Democratic Republic of Congo	DRC_ITU_OAE369_1_2_D0	microfilaria	PRJNA981587	REPLIG	Illumina Nextera DNA Flex	NextSeq 550	1905664	150	75	1644406	376660	0.1145	2611442	283201	0.104	2293015	4535.4	98.94	2.56	2.04	0.63	0.53
Democratic Republic of Congo	DRC_ITU_OAE369_1_3_D0	microfilaria	PRJNA981587	REPLIG	Illumina Nextera DNA Flex	NextSeq 550	12702280	150	75	10516477	2699987	0.1284	13497734	994201	0.1478	11271649	10653.2	99.97	14.4	11.47	3.01	3.53
Democratic Republic of Congo	DRC_ITU_OAE369_1_3_D0	microfilaria	PRJNA981587	REPLIG	Illumina Nextera DNA Flex	NextSeq 550	1687513	150	75	1423722	377952	0.1327	1822222	137186	0.0544	1688686	1936.57	98.57	2.11	1.63	0.4	0.04
Democratic Republic of Congo	DRC_ITU_OAE369_1_4_D0	microfilaria	PRJNA981587	REPLIG	Illumina Nextera DNA Flex	NextSeq 550	1748828	150	75	1550551	360543	0.1163	1740351	485244	0.2763	1211641	9556.87	100	0.2	0.03	0.11	0
Democratic Republic of Congo	DRC_ITU_OAE369_1_5_D0	microfilaria	PRJNA981587	REPLIG	Illumina Nextera DNA Flex	NextSeq 550	1498184	150	75	1312810	766338	0.2919	29195	912	0.1676	20639	19.53	45.5	0.01	0	0.02	0.01
Democratic Republic of Congo	DRC_ITU_OAE369_1_6_D0	microfilaria	PRJNA981587	REPLIG	Illumina Nextera DNA Flex	NextSeq 550	1885339	150	75	1638490	588516	0.1796	29704	4671	0.1712	22600	107.15	96.16	0.01	0	0.04	0.07
Democratic Republic of Congo	DRC_ITU_OAE369_1_7_D0	microfilaria	PRJNA981587	REPLIG	Illumina Nextera DNA Flex	NextSeq 550	10340190	150	75	8225825	587466	0.0357	15637394	1369335	0.1944	12332343	13376.3	99.97	14.92	13.41	4.5	4.42
Democratic Republic of Congo	DRC_ITU_OAE369_1_7_D0	microfilaria	PRJNA981587	REPLIG	Illumina Nextera DNA Flex	NextSeq 550	3255050	150	75	2623167	188106	0.0359	4987600	445293	0.1263	4267670	5600.27	98.95	5.02	4.18	1.47	1.42
Democratic Republic of Congo	DRC_ITU_OAE369_1_8_D0	microfilaria	PRJNA981587	REPLIG	Illumina Nextera DNA Flex	NextSeq 550	1990529	150	75	1732768	655606	0.1892	1439657	262947	0.1555	1181903	4739.97	99.9	0.9	0.67	0.4	0.12
Democratic Republic of Congo	DRC_ITU_OAE369_2_2_D0	microfilaria	PRJNA981587	REPLIG	Illumina Nextera DNA Flex	NextSeq 550	2142506	150	75	1837321	700548	0.1906	66832	9762	0.1076	56477	205.08	91.57	0.05	0.04	0.01	0
Democratic Republic of Congo	DRC_ITU_OAE369_5_1_D0	microfilaria	PRJNA981587	REPLIG	Illumina Nextera DNA Flex	NextSeq 550	1332756	150	75	1192960	1774	0.0007	2376016	1068103	0.2802	1633252	13474.4	100	0.06	0.02	0.01	0
Democratic Republic of Congo	DRC_ITU_OAE369_5_2_D0	microfilaria	PRJNA981587	REPLIG	Illumina Nextera DNA Flex	NextSeq 550	1573605	150	75	1391483	1575	0.0006	2772119	1344545	0.2859	1837573	15173.6	100	0.02	0.01	0	0
Democratic Republic of Congo	DRC_ITU_OAE369_5_3_D0	microfilaria	PRJNA981587	REPLIG	Illumina Nextera DNA Flex	NextSeq 550	1567308	150	75	1389737	1601	0.0006	2767526	1368237	0.2707	1857690	15259.9	100	0.02	0.02	0	0
Democratic Republic of Congo	DRC_ITU_OAE369_5_4_D0	microfilaria	PRJNA981587	REPLIG	Illumina Nextera DNA Flex	NextSeq 550	1366738	150	75	1015705	2144	0.0011	1260466	620110	0.1948	945311	7787.8	99.96	0.02	0.01	0	0
Democratic Republic of Congo	DRC_ITU_OAE369_5_5_D0	microfilaria	PRJNA981587	REPLIG	Illumina Nextera DNA Flex	NextSeq 550	1471701	150	75	1280506	1856	0.0007	2545689	1532818	0.3233	1486106	11164.6	66.07	0.08	0.01	0	0
Democratic Republic of Congo	DRC_ITU_OAE369_5_6_D0	microfilaria	PRJNA981587	REPLIG	Illumina Nextera DNA Flex	NextSeq 550	1560989	150	75	1381678	2261	0.0008	2746189	1405929	0.2719	1813085	14636.6	100	0.04	0.02	0.02	0
Democratic Republic of Congo	DRC_ITU_OAE369_5_7_D0	microfilaria	PRJNA981587	REPLIG	Illumina Nextera DNA Flex	NextSeq 550	1268871	150	75	1129558	1660	0.0007	2247830	1093377	0.2419	1638714	13579.2	100	0.02	0.02	0	0
Democratic Republic of Congo	DRC_ITU_OAE369_5_8_D0	microfilaria	PRJNA981587	REPLIG	Illumina Nextera DNA Flex	NextSeq 550	1402780	150	75	1233462	1587	0.0006	2456190	1317274	0.2396	1684492	13700.1	100	0.01	0.01	0	0
South Sudan	SSU_K014L_K8_D120	microfilaria	PRJNA981587	REPLIG	Illumina DNA	NovaSeq 6000	2930354	150	125	2526297	1112628	0.2202	27195	5481	0.379	13857	94.69	96.99	0	0	0	0
South Sudan	SSU_K028_D4_D0	microfilaria	PRJNA981587	REPLIG	Illumina DNA	NovaSeq 6000	38453	150	125	16727	4422	0.1322	25330	5650	0.0459	23525	0.7	0	0.03	0	0.02	0
South Sudan	SSU_K028_D4_D0	microfilaria	PRJNA981587	REPLIG	Illumina DNA	NovaSeq 6000	56649	150	125	30269	6862	0.1134	48056	12268	0.052	44321	2.04	0	0.05	0	0.03	0
South Sudan	SSU_K028_D4_D0	microfilaria	PRJNA981587	REPLIG	Illumina DNA	NovaSeq 6000	36188	150	125	7891	2023	0.1282	11362	2598	0.0406	10581	0.49	0	0.01	0	0.01	0
South Sudan	SSU_K028_D4_D0	microfilaria	PRJNA981587	REPLIG	Illumina DNA	NovaSeq 6000	39510	150	125	18167	4776	0.1314	26406	5623	0.0562	24320	1.6	0	0.03	0	0.02	0
South Sudan	SSU_K028R_B1_D0	microfilaria	PRJNA981587	REPLIG	Illumina DNA	NovaSeq 6000	1334012	150	125	1056325	420176	0.1989	34557	5296	0.0601	31065	67.63	91.59	0.03	0	0.2	0.17
South Sudan	SSU_K028R_B1_D0	microfilaria	PRJNA981587	REPLIG	Illumina DNA	NovaSeq 6000	1741619	150	125	1268270	5353	0	188	16	0.0233	147	0.08	0	0	0	0	0
South Sudan	SSU_K028R_B6_D0	microfilaria	PRJNA981587	REPLIG	Illumina DNA	NovaSeq 6000	1820175	150	125	1545507	582087	0.1883	93196	13161	0.0456	85733	129.82	97.58	0.1	0.01	0.42	0.18
South Sudan	SSU_K028R_B6_D0	microfilaria	PRJNA981587	REPLIG	Illumina DNA	NovaSeq 6000	1458088	150	125	1118079	388462	0	29883	2117	0.0477	25143	8.26	16.23	0.03	0	0.2	0.18
South Sudan	SSU_K028R_B7_D0	microfilaria	PRJNA981587	REPLIG	Illumina DNA	NovaSeq 6000	1654342	150	125	1429184	0	395858	26947	1978	0.057	24056	8.14	12.84	0.02	0	0.23	0.19
South Sudan	SSU_K028R_B7_D0	microfilaria	PRJNA981587	REPLIG	Illumina DNA	NovaSeq 6000	1055790	150	125	744922	0	344280	15151	75465	0.0432	68890	207.66	97.6	0.06	0	0.21	0.18
South Sudan	SSU_K028R_B8_D0	microfilaria	PRJNA981587	REPLIG	Illumina DNA	NovaSeq 6000	1674525	150	125	1395226	526425	0.1887	106404	21849	0.0464	97056	288.8	98.01	0.09	0.01	0.34	0.19
South Sudan	SSU_K028R_C4_D0	microfilaria	PRJNA981587	REPLIG	Illumina DNA	NovaSeq 6000	7737474	150	125	6489942	2728359	0.2102	163638	16380	0.0953	139756	148.72	89.26	0.14	0.01	1.28	0.21
South Sudan	SSU_K028R_C7_D0	microfilaria	PRJNA981587	REPLIG	Illumina DNA	NovaSeq 6000	2001268	150	125	1691781	654886	0.1935	114506	22831	0.0699	101855	318.34	98.1	0.08	0	0.73	0.2
South Sudan	SSU_K028R_C7_D0	microfilaria	PRJNA981587	REPLIG	Illumina DNA	NovaSeq 6000	1278149	150	125	942372	418706	0	28889	2093	0.0471	24473	7.82	7.07	0.03	0	0.21	0.17
South Sudan	SSU_K028R_D1_D0	microfilaria	PRJNA981587	REPLIG	Illumina DNA	NovaSeq 6000	1683211	150	125	1428180	557798	0.1953	49706	5013	0.1162	42169	42.9	65.42	0.04	0	0.31	0.18
South Sudan	SSU_K028R_D1_D0	microfilaria	PRJNA981587	REPLIG	Illumina DNA	NovaSeq 6000	1687303	150	125	1238257	568650	0	62593	5942	0.1101	48286	50.35	66.5	0.05	0	0.31	0.19
South Sudan	SSU_K028R_D2_D0	microfilaria	PRJNA981587	REPLIG	Illumina DNA	NovaSeq 6000	1787004	150	125	1461554	582415	0.1992	75458	10298	0.0985	65219	113.88	91.34	0.06	0	0.31	0.19
South Sudan	SSU_K028R_D2_D0	microfilaria	PRJNA981587	REPLIG	Illumina DNA	NovaSeq 6000	1489731	150	125	1029953	496932	0	79823	9209	0.0859	61813	110.22	92.05	0.06	0	0.25	0.18
South Sudan	SSU_K028R_D5_D0	microfilaria	PRJNA981587	REPLIG	Illumina DNA	NovaSeq 6000	1405002	150	125	1202615	450276	0.1872	24332	2411	0.0687	21352	27	46.04	0.02	0	0.31	0.19
South Sudan	SSU_K028R_D5_D0	microfilaria	PRJNA981587	REPLIG	Illumina DNA	NovaSeq 6000	1333159	150	125	1028916	418706	0	66738	7514	0.0414	54567	76.75	97.1	0.06	0	0.45	0.18
South Sudan	SSU_K028R_D7_D0	microfilaria	PRJNA981587	REPLIG	Illumina DNA	NovaSeq 6000	1992197	150	125	1728494	566655	0.1639	71894	9155	0.0493	65617	90.65	97.58	0.07	0	0.62	0.21
South Sudan	SSU_K028R_D7_D0	microfilaria	PRJNA981587	REPLIG	Illumina DNA	NovaSeq 6000	1206679	150	125	943829	321829	0	68662	9739	0.0445	54237	119.49	97.17	0.05	0	0.3	0.18
South Sudan	SSU_K028R_D8_D0	microfilaria	PRJNA981587	REPLIG	Illumina DNA	NovaSeq 6000	6632891	150	125	5734927	1515641	0.1321	259214	43631	0.0714	231784	514.44	98.82	0.23	0.03	1.36	0.22
South Sudan	SSU_K028R_E2_D0	microfilaria	PRJNA981587	REPLIG	Illumina DNA	NovaSeq 6000	1528467	150	125	1327343	361305	0.1361	33197	2370	0.0611	30031	6.38	2.77	0.03	0	0.38	0.19
South Sudan	SSU_K028R_E2_D0	microfilaria	PRJNA981587	REPLIG	Illumina DNA	NovaSeq 6000	1178409	150	125	911657	343642	0	71129	7557	0.0487	58332	86.47	96.97	0.06	0	0.51	0.2
South Sudan	SSU_K028R_E3_D0	microfilaria	PRJNA981587	REPLIG	Illumina DNA	NovaSeq 6000	1420837	150	125	1220107	388520	0.1592	65769	7661	0.0606	59650	84.36	97.02	0.06	0	0.61	0.2
South Sudan	SSU_K028R_E3_D0	microfilaria	PRJNA981587	REPLIG	Illumina DNA	NovaSeq 6000	1050099	150	125	828877	258260	0	57401	9146	0.0437	44080	137.87	97.52	0.03	0	0.29	0.18
South Sudan	SSU_K028R_E4_D0	microfilaria	PRJNA981587	REPLIG	Illumina DNA	NovaSeq 6000	1092148	150	125	953898	241358	0.1265	40362	7640	0.0479	36797	113.77	97.5	0.03	0	0.29	0.18
South Sudan	SSU_K028R_E5_D0	microfilaria	PRJNA981587	REPLIG	Illumina DNA	NovaSeq 6000	5328116	150	125	4686756	929641	0.0992	119029	11881	0.1097	102344	112.1	93.2	0.1	0.01	1.45	0.23
South Sudan	SSU_K028R_E5_D0	microfilaria	PRJNA981587	REPLIG	Illumina DNA	NovaSeq 6000	18610	150	125	14044	5081	0	4717	14	0.037	4477	0.02	0	0.01	0	0.01	0.01
South Sudan	SSU_K028R_E6_D0	microfilaria	PRJNA981587	REPLIG	Illumina DNA	NovaSeq 6000	964699	150	125	818075	89576	0.0547	32957	3091	0.0507	30598	21.6	35.75	0.04	0	0.33	0.19
South Sudan	SSU_K028R_E6_D0	microfilaria	PRJNA981587	REPLIG	Illumina DNA	NovaSeq 6000	560761	150	125	428887	72965	0	27611	2380	0.037	23733	17.19	30.04	0.03	0	0.21	0.18
South Sudan	SSU_K028R_F2_D0	microfilaria	PRJNA981587	REPLIG	Illumina DNA	NovaSeq 6000	1266965	150	125	1103122	311981	0.1414	60364	10578	0.063	54399	153.81	97.66	0.04	0	0.57	0.2
South Sudan	SSU_K028R_F3_D0	microfilaria	PRJNA981587	REPLIG	Illumina DNA	NovaSeq 6000	1593575	150	125	1387408	311876	0.1124	48448	6217	0.0487	44470	62.2	74.34	0.05	0	0.28	0.19
South Sudan	SSU_K028R_F3_D0	microfilaria	PRJNA981587	REPLIG	Illumina DNA	NovaSeq 6000	1095403	150	125	852928	235208	0	14556	894	0.0709	12008	4.7	1.74	0.01	0	0.29	0.19
South Sudan	SSU_K028R_F6_D0	microfilaria	PRJNA981587	REPLIG	Illumina DNA	NovaSeq 6000	1014943	150	125	877188	144560	0.0824	61129	6865	0.032	57715	40.19	52.58	0.07	0	0.24	0.19
South Sudan	SSU_K028R_F6_D0	microfilaria	PRJNA981587	REPLIG	Illumina DNA	NovaSeq 6000	645777	150	125	512132	109008	0	55692	5560	0.0234	47709	34.242	48.974	0.06	0.001	0.161	0.167
South Sudan	SSU_K028R_G5_D0	microfilaria	PRJNA981587	REPLIG	Illumina DNA	NovaSeq 6000	4269776	150	125	3743945	683887	0.0913	65208	5458	0.0681	58856	32.58	75.48	0.07	0	0.47	0.22
South Sudan	SSU_K028R_G5_D0	microfilaria	PRJNA981587	REPLIG	Illumina DNA	NovaSeq 6000	1164171	150	125	913824	242499	0	23143	1755	0.0444	19745	10.06	9.58	0.02	0	0.14	0.18
South Sudan	SSU_K028R_G6_D0	microfilaria	PRJNA981587	REPLIG	Illumina DNA	NovaSeq 6000	2446316	150	125	2154664	372533	0.0864	46544	3897	0.1047	40251	37.03	68.99	0.03	0	0.85	0.21
South Sudan	SSU_K028R_G7_D0	microfilaria	PRJNA981587	REPLIG	Illumina DNA	NovaSeq 6000	1442720	150	125	1255861	339561	0.1352	33750	2816	0.0705	30115	18.48	37.82	0.03	0	0.41	0.19
South Sudan	SSU_K028R_G7_D0	microfilaria	PRJNA981587	REPLIG	Illumina DNA	NovaSeq 6000	950107	150	125	741751	247550	0	28193	2195	0.0497	23762	15.31	31.45	0.02	0	0.27	0.18
South Sudan	SSU_K028R_G8_D0	microfilaria	PRJNA981587	REPLIG	Illumina DNA	NovaSeq 6000	1749695	150	125	1521411	507659	0.1668	29855	3258	0.0661	26316	37.53	58.96	0.02	0	0.33	0.19
South Sudan	SSU_K028R_H1_D0	microfilaria	PRJNA981587	REPLIG	Illumina DNA	NovaSeq 6000	1624818	150	125	1402856	338963	0.1208	49546	6337	0.0433	45692	64.88	75.32	0.05	0	0.25	0.19
South Sudan	SSU_K028R_H1_D0	microfilaria	PRJNA981587	REPLIG	Illumina DNA	NovaSeq 6000	1539255	150	125	1161687	357171	0	62363	6904	0.0381	51383	72.28	81.66	0.06	0	0.24	0.18
South Sudan	SSU_K028R_H4_D0	microfilaria	PRJNA981587	REPLIG	Illumina DNA	NovaSeq 6000	4862026	150	125	4192193	1285053	0.1533	155362	15632	0.0553	141394	109.7	94.29	0.17	0.01	0.87	0.21
South Sudan	SSU_K028R_H4_D0	microfilaria	PRJNA981587	REPLIG	Illumina DNA	NovaSeq 6000	909340	150	125	665487	310424	0	12822	585	0.0655	10708	1.16	0	0.01	0	0.16	0.17
South Sudan	SSU_K028R_I6_D0	microfilaria	PRJNA981587	REPLIG	Illumina DNA	NovaSeq 6000	4214298	150	125	3465192	1166849	0.1684	104081	17899	0.0602	92438	251.11	97.79	0.08	0	0.56	0.2
South Sudan	SSU_K029L_C4_D120	microfilaria	PRJNA981587	REPLIG	Illumina DNA	NovaSeq 6000	3060820	150	125	2617548	214795	0.041	35293	5068	0.1883	27620	97.22	96.28	0	0	1.12	0.21
South Sudan	SSU_K096R_A4_D0	microfilaria	PRJNA981587	REPLIG	Illumina DNA	NovaSeq 6000	1257174	150	125	1052258	340178	0.1616	17609	765	0.1285	14295	4.26	1.52	0.01	0	0.5	0.18
South Sudan	SSU_K096R_A4_D0	microfilaria	PRJNA981587	REPLIG	Illumina DNA	NovaSeq 6000	1048253	150	125	776342	293144	0	59078	7597	0.0486	47024	96.791	97.097	0.043	0.001	0.397	0.19
South Sudan	SSU_K096R_A5_D0	microfilaria	PRJNA981587	REPLIG	Illumina DNA	NovaSeq 6000	1369692	150	125	1160821	340932	0.1468	56241	8288	0.0567	50932	105.25	97.24	0.05	0	0.51	0.2
South Sudan	SSU_K096R_A6_D0	microfilaria	PRJNA981587	REPLIG	Illumina DNA	NovaSeq 6000	3666356	150	125	3200215	717675	0.1121	148810	22689	0.0359	138581	274.29	98.38	0.15	0.01	0.35	0.2
South Sudan	SSU_K096R_A7_D0	microfilaria	PRJNA981587	REPLIG	Illumina DNA	NovaSeq 6000	1338734	150	125	1171363	300947	0.1285	27274	2428	0.0501	25036	23.99	36.71	0.03	0	0.25	0.18
South Sudan	SSU_K096R_A8_D0	microfilaria	PRJNA981587	REPLIG	Illumina DNA	NovaSeq 6000	1388927	150	125	1210017	321883	0.133	40608	5182	0.0638	36535	68.92	96.79	0.03	0	0.46	0.19
South Sudan	SSU_K096R_C1_D0	microfilaria	PRJNA981587	REPLIG	Illumina DNA	NovaSeq 6000	1401074	150	125	1234917	348807	0.1412	49504	4137	0.0428	46091	19.13	36.85	0.06	0	0.27	0.19
South Sudan	SSU_K096R_C5_D0	microfilaria	PRJNA981587	REPLIG	Illumina DNA	NovaSeq 6000	1205600	150	125	1037242	174821	0.0843	67805	6882	0.0348	63768	53.53	77.71	0.08	0	0.27	0.19
South Sudan	SSU_K096R_C5_D0	microfilaria	PRJNA981587	REPLIG	Illumina DNA	NovaSeq 6000	818801	150	125	649057	172258	0	69547	7591	0.0331	58085	89.3	97.49	0.07	0	0.22	0.17
South Sudan	SSU_K096R_C6_D0	microfilaria	PRJNA981587	REPLIG	Illumina DNA	NovaSeq 6000	4932351	150	125	4309256	845562	0.0981	292933	36688	0.0475	271076	407.89	98.39	0.32	0.01	1.05	0.21
South Sudan	SSU_K096R_C7_D0	microfilaria	PRJNA981587	REPLIG	Illumina DNA	NovaSeq 6000	1131451	150	125	932865	162812	0.0873	164303	23038	0.0399	153443	282.13	98.02	0.18	0	0.48	0.19
South Sudan	SSU_M204_L11_D0	microfilaria	PRJNA981587	REPLIG	Illumina Nextera DNA Flex	NextSeq 550	1693500	150	75	1551369	446681	0.144	1108434	79513	0.3256	739248	1097.78	98.4	0.92	0.4	0.16	0
South Sudan	SSU_M204_L11_D120	microfilaria	PRJNA981587	REPLIG	Illumina Nextera DNA Flex	NextSeq 550	3013651	150	75	2485519	5456	0.0011	4949830	1602449	0.4394	2647401	21625.2	100	0.19	0.08	0.04	0.07
South Sudan	SSU_M204_L12_D0	microfilaria	PRJNA981587	REPLIG	Illumina Nextera DNA Flex	NextSeq 550	1897926	150	75	1733152	4015	0.0012	3453110	693987	0.4424	1854768	10240	99.95	1.06	0.2	0	0
South Sudan	SSU_M204_L12_D120	microfilaria	PRJNA981587	REPLIG	Illumina Nextera DNA Flex	NextSeq 550	1544111	150	75	1406279	1395	0.0005	2803336	1429375	0.2082	2138581	17742.5	100	0.04	0.03	0.04	0.07
South Sudan	SSU_M204_L13_D0	microfilaria	PRJNA981587	REPLIG	Illumina Nextera DNA Flex	NextSeq 550	1171074	150	75	1065647	444417	0.2085	187103	11971	0.0389	175399	114.22	96.9	0.23	0.09	0.15	0.01
South Sudan	SSU_M204_L13_D120	microfilaria	PRJNA981587	REPLIG	Illumina Nextera DNA Flex	NextSeq 550	1267708	150	75	1162198	233519	0.1005	22590	2187	0.1508	19017	16.16	26.14	0.02	0	0	0
South Sudan	SSU_M204_L14_D120	microfilaria	PRJNA981587	REPLIG	Illumina Nextera DNA Flex	NextSeq 550	1031372	150	75	709836	178919	0.126	48696	8935	0.0193	45594	182.14	99.45	0.03	0	0	0
South Sudan	SSU_M204_L15_D120	microfilaria	PRJNA981587	REPLIG	Illumina Nextera DNA Flex	NextSeq 550	1662762	150	75	1505381	2010	0.0007	2997330	1711181	0.3377	1824547	14532.1	95.91	0.02	0	0	0
South Sudan	SSU_M204_L16_D0	microfilaria	PRJNA981587	REPLIG	Illumina Nextera DNA Flex	NextSeq 550	1981542	150	75	1804413	2191	0.0006	3595351	1841877	0.275	2531946	20666.3	100	0.08	0.03	0.08	0.18
South Sudan	SSU_M204_L16_D120	microfilaria	PRJNA981587	REPLIG	Illumina Nextera DNA Flex	NextSeq 550	2493433	150	75	2071059	29714	0.0072	4076289	1359609	0.4175	2274827	18896.7	100	0.11	0.09	0.01	0
South Sudan	SSU_M204_L17_D0	microfilaria	PRJNA981587	REPLIG	Illumina Nextera DNA Flex	NextSeq 550	2050411	150	75	1865889	2504	0.0007	3718692	1383248	0.3351	2368919	20235.1	100	0.08	0.05	0.13	0.02
South Sudan	SSU_M204_L17_D120	microfilaria	PRJNA981587	REPLIG	Illumina Nextera DNA Flex	NextSeq 550	2283400	150	75	1817659	3753	0.001	3621141	1113193	0.4548	1889708	15722.3	99.99	0.07	0.07	0.02	0
South Sudan	SSU_M204_L18_D0	microfilaria	PRJNA981587	REPLIG	Illumina Nextera DNA Flex	NextSeq 550	2040600	150	75	1813466	13172	0.0036	3594477	1304272	0.4087	2039935	16645	100	0.15	0.05	0.09	0
South Sudan	SSU_M204_L21_D0	microfilaria	PRJNA981587	REPLIG	Illumina Nextera DNA Flex	NextSeq 550	1455092	150	75	1249437	453015	0.1813	50385	2324	0.7019	14738	55.9	96.86	0	0	0	0
South Sudan	SSU_M204_L22_D0	microfilaria	PRJNA981587	REPLIG	Illumina Nextera DNA Flex	NextSeq 550	1897603	150	75	1731675	3258	0.0009	3446535	1785358	0.3246	2122815	17309.8	100	0.04	0.03	0	0
South Sudan	SSU_M204_L25_D0	microfilaria	PRJNA981587	REPLIG	Illumina Nextera DNA Flex	NextSeq 550	2033727	150	75	1851067	1952	0.0005	3687379	1953136	0.2554	2597254	21380.1	100	0.03	0.01	0	0
South Sudan	SSU_M204_L26_D0	microfilaria	PRJNA981587	REPLIG	Illumina Nextera DNA Flex	NextSeq 550	1803818	150	75	1642853	895246	0.2725	470179	113458	0.151	379727	1988.14	99.74	0.22	0.1	0.13	0.01
South Sudan	SSU_M204_L27_D0	microfilaria	PRJNA981587	REPLIG	Illumina Nextera DNA Flex	NextSeq 550	1859496	150	75	1710025	2715	0.0008	3407317	1264970	0.3352	2159088	18535.6	100	0.08	0.06	0	0
South Sudan	SSU_M204_L31_D0	microfilaria	PRJNA981587	REPLIG	Illumina Nextera DNA Flex	NextSeq 550	1389693	150	75	1272680	561888	0.2207	52135	7621	0.0715	45261	116.41	96.96	0.04	0.01	0.17	0.35
South Sudan	SSU_M204_L32_D0	microfilaria	PRJNA981587	REPLIG	Illumina Nextera DNA Flex	NextSeq 550	1899398	150	75	1736418	1917	0.0006	3462631	1336382	0.3165	2289004	18816.9	100	0.19	0.1	0.01	0
South Sudan	SSU_M204_L34_D0	microfilaria	PRJNA981587	REPLIG	Illumina Nextera DNA Flex	NextSeq 550	1652819	150	75	1496488	18277	0.0061	2872353	1144299	0.293	1949682	16861	100	0.02	0.02	0	0
South Sudan	SSU_M204_L35_D0	microfilaria	PRJNA981587	REPLIG	Illumina Nextera DNA Flex	NextSeq 550	2282521	150	75	1946358	46636	0.012	3798234	999109	0.2711	2655241	13894.7	100	1.5	0.71	0.53	0.09
South Sudan	SSU_M204_L37_D0	microfilaria	PRJNA981587	REPLIG	Illumina Nextera DNA Flex	NextSeq 550	1734392	150	75	1595147	1948	0.0006	3178763	1260039	0.3052	2108917	18264.2	100	0.02	0.02	0	0
South Sudan	SSU_M204_L38_D0	microfilaria	PRJNA981587	REPLIG	Illumina Nextera DNA Flex	NextSeq 550	2087924	150	75	1924525	1576180	0.4095	62772	1119	0.6268	13679	18.49	39.6	0	0	0.01	0
South Sudan	SSU_M204_L41_D0	microfilaria	PRJNA981587	REPLIG	Illumina Nextera DNA Flex	NextSeq 550	1641809	150	75	1487025	2396	0.0008	2952282	1537670	0.2112	2195533	18264.2	100	0.01	0.01	0	0
South Sudan	SSU_M204_L43_D0	microfilaria	PRJNA981587	REPLIG	Illumina Nextera DNA Flex	NextSeq 550	1415830	150	75	1289610	1476	0.0006	2571073	1005384	0.2783	1769216	14986.1	100	0.08	0.06	0	0
South Sudan	SSU_M204_L44_D0	microfilaria	PRJNA981587	REPLIG	Illumina Nextera DNA Flex	NextSeq 550	1452075	150	75	1335550	1318	0.0005	2662114	1352601	0.2079	1994916	16635.2	100	0.04	0.02	0	0
South Sudan	SSU_M204_L45_D0	microfilaria	PRJNA981587	REPLIG	Illumina Nextera DNA Flex	NextSeq 550	1543318	150	75	1403087	100850	0.0359	2292192	1160962	0.2153	1661335	13794.3	100	0.03	0.02	0	0
South Sudan	SSU_M204_L46_D0	microfilaria	PRJNA981587	REPLIG	Illumina Nextera DNA Flex	NextSeq 550	1327998	150	75	1226711	416319	0.1697	50414	3542	0.031	45844	43.65	95.81	0.05	0	0.04	0
South Sudan	SSU_M204_L47_D0	microfilaria	PRJNA981587	REPLIG	Illumina Nextera DNA Flex	NextSeq 550	1952406	150	75	1723227	13470	0.0039	3390741	1340838	0.3118	2232055	18866.6	100	0.07	0.04	0.02	0
South Sudan	SSU_M204_L48_D0	microfilaria	PRJNA981587	REPLIG	Illumina Nextera DNA Flex	NextSeq 550	2618711	150	75	2222594	144500	0.0325	3915662	1297161	0.3302	2523567	17483	100	0.69	0.37	0.06	0
South Sudan	SSU_M204_R12_D120	microfilaria	PRJNA981587	REPLIG	Illumina Nextera DNA Flex	NextSeq 550	1679842	150	75	1510224	1588	0.0005	3007568	1599517	0.2297	2150670	17758.3	100	0.02	0.01	0	0
South Sudan	SSU_M204_R21_D120	microfilaria	PRJNA981587	REPLIG	Illumina Nextera DNA Flex	NextSeq 550	1966598	150	75	1797242	2398	0.0007	3580979	1879567	0.3472	2531748	20658	100	0.07	0.06	0	0
South Sudan	SSU_M204L_E4_D0	microfilaria	PRJNA981587	REPLIG	Illumina DNA	NovaSeq 6000	5528249	150	125	4351052	4003263	0.46	176149	3993	0.1025	126177	33	64.7	0.06	0.03	0.53	0.3
South Sudan	SSU_M204L_E4_D0	microfilaria	PRJNA981587	REPLIG	Illumina DNA	NovaSeq 6000	5439791	150	125	3452524	3435421	0	154834	3497	0.0947	109607	29.38	52.55	0.05	0.02	0.41	0.29
South Sudan	SSU_M204L_C6_D0	microfilaria	PRJNA981587	REPLIG	Illumina DNA	NovaSeq 6000	4318776	150	125	3771882	2324294	0.3081	103376	2131	0.0895	75074	23.79	39.49	0.03	0.02	0.38	0.28
South Sudan	SSU_M204L_C6_D0	microfilaria	PRJNA981587	REPLIG	Illumina DNA	NovaSeq 6000	2363238	150	125	1795929	1289265	0	58107	1209	0.064	42417	11.6	19.914	0.015	0.013	0.184	0.208
South Sudan	SSU_M204L_F4_D0	microfilaria	PRJNA981587	REPLIG	Illumina DNA	NovaSeq 6000	2939701	150	125	2117304	2350794	0.5551	98786	1673	0.0719	70874	14.01	26.41	0.03	0.02	0.15	0.18
South Sudan	SSU_M204L_F4_D0	microfilaria	PRJNA981587	REPLIG	Illumina DNA	NovaSeq 6000	4281791	150	125	2440208	2816684	0	119157	1994	0.0793	83518	17	29.32	0.03	0.02	0.16	0.18
South Sudan	SSU_M204L_H5_D120	microfilaria	PRJNA981587	REPLIG	Illumina DNA	NovaSeq 6000	2258410	150	125	1977342	946091	0.2392	61840	3839	0.0454	51237	48.67	88.96	0.04	0.01	0.17	0.2
South Sudan	SSU_M204L_H5_D120	microfilaria	PRJNA981587	REPLIG	Illumina DNA	NovaSeq 6000	1609186	150	125	1219018	707749	0	48361	2905	0.0414	37742	35.98	71.25	0.0252812	0	0.11	0.15
South Sudan	SSU_M206_L11_D0	microfilaria	PRJNA981587	REPLIG	Illumina Nextera DNA Flex	NextSeq 550	1297000	150	75	1186026	138463	0.0584	4955	129	0.3246	3085	2.17	0	0	0	0	0
South Sudan	SSU_M206_L11_D0	microfilaria	PRJNA981587	REPLIG	Illumina NexteraFlexDNA	NovaSeq 6000	1575370	150	125	1364594	198842	0.0729	7591	825	0.3715	4405	12.94	16.85	0	0	0	0
South Sudan	SSU_M206_L11_D120	microfilaria	PRJNA981587	REPLIG	Illumina Nextera DNA Flex	NextSeq 550	1466882	150	75	1355145	603900	0.2228	106636	46550	0.071	91176	721.3	99.61	0	0	0	0
South Sudan	SSU_M206_L14_D0	microfilaria	PRJNA981587	REPLIG	Illumina Nextera DNA Flex	NextSeq 550	1707588	150	75	1563913	3123063	0.9985	1915	897	0.023	1769	11.98	15.93	0	0	0	0
South Sudan	SSU_M206_L14_D0	microfilaria	PRJNA981587	REPLIG	Illumina NexteraFlexDNA	NovaSeq 6000	1722276	150	125	1392878	2760459	0.9909	3398	979	0.0341	3137	17.23	37.99	0	0	0	0
South Sudan	SSU_M206_L14_D120	microfilaria	PRJNA981587	REPLIG	Illumina Nextera DNA Flex	NextSeq 550	1763606	150	75	1607511	19938	0.0062	3137268	1191524	0.3336	2011938	17581.4	100	0	0	0	0
South Sudan	SSU_M206_L15_D120	microfilaria	PRJNA981587	REPLIG	Illumina Nextera DNA Flex	NextSeq 550	1880823	150	75	1712876	2492	0.0007	3408853	2104956	0.2555	2348145	18742.5	88.37	0	0	0	0
South Sudan	SSU_M206_L16_D120	microfilaria	PRJNA981587	REPLIG	Illumina Nextera DNA Flex	NextSeq 550	1683843	150	75	1527213	2098	0.0007	3043215	1163251	0.3134	2008666	17559.1	100	0.01	0.01	0	0
South Sudan	SSU_M206_L18_D0	microfilaria	PRJNA981587	REPLIG	Illumina Nextera DNA Flex	NextSeq 550	1623654	150	75	1499897	552064	0.184	93481	25208	0.1094	77203	506.44	99.35	0.01	0.01	0.18	0.1
South Sudan	SSU_M206_L18_D0	microfilaria	PRJNA981587	REPLIG	Illumina NexteraFlexDNA	NovaSeq 6000	1782939	150	125	1546984	466824	0.1509	75375	20298	0.1274	61495	398.25	99.05	0.01	0.01	0.19	0.11
South Sudan	SSU_M206_L21_D0	microfilaria	PRJNA981587	REPLIG	Illumina NexteraFlexDNA	NovaSeq 6000	1525652	150	125	1249505	2126	0.0009	2488270	198292	0.0687	2284308	2183.41	99.19	3	2.61	2.74	2.64
South Sudan	SSU_M206_L21_D120	microfilaria	PRJNA981587	REPLIG	Illumina Nextera DNA Flex	NextSeq 550	2027239	150	75	1866208	2186	0.0006	3719422	1435936	0.3072	2463324	21723.5	100	0	0	0	0
South Sudan	SSU_M206_L22_D0	microfilaria	PRJNA981587	REPLIG	Illumina NexteraFlexDNA	NovaSeq 6000	1464305	150	125	1164208	3060	0.0013	2318084	327215	0.1118	2015688	4511.04	98.57	2.2	2.09	1.22	0.65
South Sudan	SSU_M206_L22_D120	microfilaria	PRJNA981587	REPLIG	Illumina Nextera DNA Flex	NextSeq 550	2244641	150	75	2058641	2249	0.0005	4103710	2113780	0.2549	2917985	24502.9	100	0	0	0	0
South Sudan	SSU_M206_L23_D120	microfilaria	PRJNA981587	REPLIG	Illumina Nextera DNA Flex	NextSeq 550	5674889	150	75	5220111	1950654	0.1868	50063	2459	0.3971	24572	57.88	96.59	0	0	0	0
South Sudan	SSU_M206_L24_D0	microfilaria	PRJNA981587	REPLIG	Illumina NexteraFlexDNA	NovaSeq 6000	1833558	150	125	1482683	133497	0.045	2640069	150629	0.6666	879408	41.33	96.51	1.38	0.03	0.01	0
South Sudan	SSU_M206_L25_D0	microfilaria	PRJNA981587	REPLIG	Illumina NexteraFlexDNA	NovaSeq 6000	1221344	150	125	990153	2174	0.0011	1973279	266755	0.1127	1706913	4030.61	99.89	1.87	1.51	0.19	0
South Sudan	SSU_M206_L25_D120	microfilaria	PRJNA981587	REPLIG	Illumina Nextera DNA Flex	NextSeq 550	1464242	150	75	1294960	684963	0.2645	34857	10686	0.0525	30258	217.53	97.06	0	0	0.03	0.09
South Sudan	SSU_M206_L26_D0	microfilaria	PRJNA981587	REPLIG	Illumina NexteraFlexDNA	NovaSeq 6000	1813021	150	125	1284846	544	0.0002	2565587	1246298	0.2802	1751230	14991.5	100	0.02	0.01	0	0
South Sudan	SSU_M206_L26_D120	microfilaria	PRJNA981587	REPLIG	Illumina Nextera DNA Flex	NextSeq 550	1751277	150	75	1615052	356063	0.1102	1331596	655846	0.194	996496	8415.93	99.99	0	0	0.08	0.12
South Sudan	SSU_M206_L27_D120	microfilaria	PRJNA981587	REPLIG	Illumina Nextera DNA Flex	NextSeq 550	1866478	150	75	1699538	2150	0.0006	3386782	1298695	0.3206	2216593	19442.2	100	0	0	0	0
South Sudan	SSU_M206_L28_D120	microfilaria	PRJNA981587	REPLIG	Illumina Nextera DNA Flex	NextSeq 550	2005218	150	75	1829790	2180	0.0006	3643284	1544545	0.2983	2416423	20880	100	0	0	0	0
South Sudan	SSU_M206_L31_D0	microfilaria	PRJNA981587	REPLIG	Illumina NexteraFlexDNA	NovaSeq 6000	1517260	150	125	1193962	110044	0.0461	1654648	940140	0.2505	1151134	9731.26	99.99	0	0	0	0
South Sudan	SSU_M206_L31_D120	microfilaria	PRJNA981587	REPLIG	Illumina Nextera DNA Flex	NextSeq 550	1726568	150	75	1585103	2432	0.0008	3156374	1288569	0.324	2026175	17466.3	100	0.01	0.01	0	0
South Sudan	SSU_M206_L34_D0	microfilaria	PRJNA981587	REPLIG	Illumina NexteraFlexDNA	NovaSeq 6000	1477319	150	125	1125800	8987	0.004	2229798	871436	0.2196	1672893	12629.5	100	0.34	0.26	0.26	0.48
South Sudan	SSU_M206_L35_D0	microfilaria	PRJNA981587	REPLIG	Illumina NexteraFlexDNA	NovaSeq 6000	1421381	150	125	1104094	766	0.0003	2202791	667137	0.1835	1737506	9487.28	99.99	1	0.69	0	0
South Sudan	SSU_M206_L36_D120	microfilaria	PRJNA981587	REPLIG	Illumina Nextera DNA Flex	NextSeq 550	1397458	150	75	1285976	581812	0.2262	28463	3716	0.178	18072	91.95	96.87	0	0	0	0
South Sudan	SSU_M206_L37_D120	microfilaria	PRJNA981587	REPLIG	Illumina Nextera DNA Flex	NextSeq 550	1825720	150	75	1667226	13510	0.0041	3285580	1257781	0.3639	1990673	17303.6	100	0	0	0	0
South Sudan	SSU_M206_L38_D0	microfilaria	PRJNA981587	REPLIG	Illumina NexteraFlexDNA	NovaSeq 6000	1449415	150	125	1106276	14633	0.0066	2186275	1066102	0.253	1553719	13454.4	100	0.02	0	0	0
South Sudan	SSU_M206_L42_D120	microfilaria	PRJNA981587	REPLIG	Illumina Nextera DNA Flex	NextSeq 550	1325372	150	75	1204090	194131	0.0806	145959	57838	0.023	129263	1140.32	99.62	0	0	0	0
South Sudan	SSU_M206_L43_D120	microfilaria	PRJNA981587	REPLIG	Illumina Nextera DNA Flex	NextSeq 550	1283401	150	75	1186645	403798	0.1701	60924	17041	0.1094	50122	381.97	99.57	0	0	0.02	0.02
South Sudan	SSU_M206_L44_D120	microfilaria	PRJNA981587	REPLIG	Illumina Nextera DNA Flex	NextSeq 550	1562244	150	75	1429116	632294	0.2212	142713	40491	0.071	125034	659.37	99.61	0.06	0	0.1	0
South Sudan	SSU_M206_L45_D120	microfilaria	PRJNA981587	REPLIG	Illumina Nextera DNA Flex	NextSeq 550	1190838	150	75	1105187	278792	0.1261	314816	117412	0.1194	267245	2346.77	99.9	0	0	0	0
South Sudan	SSU_M206_L46_D120	microfilaria	PRJNA981587	REPLIG	Illumina Nextera DNA Flex	NextSeq 550	1273508	150	75	1172857	278523	0.1187	901025	356913	0.1777	708731	5934.74	100	0.04	0	0.08	0
South Sudan	SSU_M206_L47_D120	microfilaria	PRJNA981587	REPLIG	Illumina Nextera DNA Flex	NextSeq 550	1156337	150	75	1069029	360487	0.1686	13146	1019	0.167	8552	21.46	54.72	0	0	0	0
South Sudan	SSU_M206_L48_D120	microfilaria	PRJNA981587	REPLIG	Illumina Nextera DNA Flex	NextSeq 550	1300157	150	75	1186277	542037	0.2285	18843	3745	0.1508	13804	75.36	91.41	0	0	0.05	0.09
South Sudan	SSU_M206L_B7_D0	microfilaria	PRJNA981587	REPLIG	Illumina DNA	NovaSeq 6000	2078674	150	125	1553221	610185	0.1964	157870	21082	0.0454	124604	186.93	96.85	0.13	0.02	0.1	0.12
South Sudan	SSU_M206L_B7_D0	microfilaria	PRJNA981587	DOPLIFY	Illumina DNA	NovaSeq 6000	2257796	150	125	1501942	187301	0.0624	2500838	7939	0.252	1839308	38.35	15.78	2.75	2.02	1.45	1.32
South Sudan	SSU_M206L_B8_D0	microfilaria	PRJNA981587	REPLIG	Illumina DNA	NovaSeq 6000	1694472	150	125	1264765	604150	0.2388	63504	5639	0.0344	51185	34.72	47.46	0.05	0	0.11	0.17
South Sudan	SSU_M206L_B8_D0	microfilaria	PRJNA981587	DOPLIFY	Illumina DNA	NovaSeq 6000	2918492	150	125	2118029	507618	0.1198	2195909	7897	0.2059	1712432	33.49	14.17	2.55	2.1	2.08	1.84
South Sudan	SSU_M206L_F4_D0	microfilaria	PRJNA981587	REPLIG	Illumina DNA	NovaSeq 6000	3137688	150	125	1750754	1728296	0.4936	398745	38389	0.0469	333347	3.59	0.52	0.01	0	0.12	0.17
South Sudan	SSU_M206L_F4_D0	microfilaria	PRJNA981587	DOPLIFY	Illumina DNA	NovaSeq 6000	3094581	150	125	2225713	768855	0.1727	1396539	4853	0.169	1138111	20.52	7.33	1.7	1.54	1.36	0.88
South Sudan	SSU_M206R_G1_D0	microfilaria	PRJNA981587	REPLIG	Illumina DNA	NovaSeq 6000	1632543	150	125	1235327	702887	0.2845	1773885	5957	0.0349	62638	46.59	74.43	0.06	0	0.1	0.160209
South Sudan	SSU_M206R_G1_D0	microfilaria	PRJNA981587	DOPLIFY	Illumina DNA	NovaSeq 6000	2953570	150	125	2169074	663487	0.1529	1624612	5554	0.1648	1332865	36.59	19.11	2.02	1.85	1.12	0.59
South Sudan	SSU_M206R_G2_D0	microfilaria	PRJNA981587	REPLIG	Illumina DNA	NovaSeq 6000	1898775	150	125	1398253	851422	0.3045	76109	5660	0.0417	60761	46.39	59.87	0.06	0.01	0.15	0.172181
South Sudan	SSU_M206R_G2_D0	microfilaria	PRJNA981587	DOPLIFY	Illumina DNA	NovaSeq 6000	1594898	150	125	1183804	364468	0.1539	635995	2265	0.1051	556712	10.48	7.31	0.84	0.93	1.12	0.44
South Sudan	SSU_M206R_G4_D0	microfilaria	PRJNA981587	REPLIG	Illumina DNA	NovaSeq 6000	1196394	150	125	814025	594499	0.3652	62856	5936	0.0391	49577	54.98	50.54	0.04	0	0.16	0.167809
South Sudan	SSU_M206R_G4_D0	microfilaria	PRJNA981587	DOPLIFY	Illumina DNA	NovaSeq 6000	2089041	150	125	1497522	457900	0.1529	1196150	3845	0.1307	1020384	17.04	7.33	1.55	1.61	1.06	0.89
South Sudan	SSU_M206R_G6_D0	microfilaria	PRJNA981587	REPLIG	Illumina DNA	NovaSeq 6000	3413930	150	125	2545867	1326512	0.2605	88563	6330	0.0557	69064	68.49	83.94	0.05	0.01	0.4	0.228291
South Sudan	SSU_M206R_G6_D0	microfilaria	PRJNA981587	DOPLIFY	Illumina DNA	NovaSeq 6000	2742294	150	125	2029319	705789	0.1739	906410	2896	0.1472	754742	14.9	7.31	1.14	1.08	1.22	0.63
South Sudan	SSU_M206R_G7_D0	microfilaria	PRJNA981587	REPLIG	Illumina DNA	NovaSeq 6000	2120200	150	125	1548041	815198	0.2633	134233	13235	0.0375	109320	119.11	96.3	0.12	0.01	0.31	0.184569
South Sudan	SSU_M206R_G7_D0	microfilaria	PRJNA981587	DOPLIFY	Illumina DNA	NovaSeq 6000	2470519	150	125	1868063	515743	0.138	1540271	3985	0.1459	1290367	15.38	8.95	1.97	1.86	0.91	0.68
South Sudan	SSU_M206R_G8_D0	microfilaria	PRJNA981587	REPLIG	Illumina DNA	NovaSeq 6000	2462784	150	125	1837267	1031657	0.2808	87646	7045	0.0345	70267	68.96	78.72	0.06	0.01	0.2	0.174887
South Sudan	SSU_M206R_G8_D0	microfilaria	PRJNA981587	DOPLIFY	Illumina DNA	NovaSeq 6000	2393894	150	125	1776900	570627	0.1606	1130669	3848	0.1249	966967	20.03	10.73	1.43	1.42	1.02	0.67
South Sudan	SSU_M206R_H1_D0	microfilaria	PRJNA981587	REPLIG	Illumina DNA	NovaSeq 6000	1908741	150	125	1422080	778660	0.2738	64616	4114	0.0392	52677	29.07	66.01	0.05	0.01	0.23	0.177594
South Sudan	SSU_M206R_H1_D0	microfilaria	PRJNA981587	DOPLIFY	Illumina DNA	NovaSeq 6000	2091729	150	125	1522001	590306	0.1939	937180	2791	0.1274	801820	13.95	8.86	1.21	1.25	0.74	0.23
South Sudan	SSU_M206R_H5_D0	microfilaria	PRJNA981587	REPLIG	Illumina DNA	NovaSeq 6000	2487115	150	125	1816673	882710	0.2429	68743	4679	0.0456	55322	36.19	69.69	0.05	0.01	0.2	0.17
South Sudan	SSU_M206R_H5_D0	microfilaria	PRJNA981587	DOPLIFY	Illumina DNA	NovaSeq 6000	2577505	150	125	1943021	749344	0.1928	834827	2479	0.1227	714905	16.32	13.58	1.05	1.1	1.34	0.66
South Sudan	SSU_M206R_H6_D0	microfilaria	PRJNA981587	REPLIG	Illumina DNA	NovaSeq 6000	3718738	150	125	2346311	1990526	0.4242	135820	9185	0.0481	107582	79.78	93.82	0.1	0.01	0.3	0.22
South Sudan	SSU_M206R_H6_D0	microfilaria	PRJNA981587	DOPLIFY	Illumina DNA	NovaSeq 6000	2046462	150	125	1511141	396394	0.1312	808521	2047	0.1168	701039	12.3	7.31	1.05	1.09	1.43	0.91
South Sudan	SSU_M206R_H7_D0	microfilaria	PRJNA981587	REPLIG	Illumina DNA	NovaSeq 6000	2768181	150	125	1946680	1427443	0.3666	127789	9277	0.0453	102060	82.22	92.47	0.1	0.02	0.13	0.17
South Sudan	SSU_M206R_H7_D0	microfilaria	PRJNA981587	DOPLIFY	Illumina DNA	NovaSeq 6000	1500486	150	125	1141616	250800	0.1098	534351	1779	0.084	480007	5.51	5.55	0.72	0.83	0.64	0.38
South Sudan	SSU_M206R_H8_D0	microfilaria	PRJNA981587	REPLIG	Illumina DNA	NovaSeq 6000	2816508	150	125	2028651	1143526	0.2818	285848	26324	0.0392	236955	171.56	97.51	0.29	0.02	0.23	0.18
South Sudan	SSU_M206R_H8_D0	microfilaria	PRJNA981587	DOPLIFY	Illumina DNA	NovaSeq 6000	1718860	150	125	1199605	228570	0.0953	1026229	3061	0.1008	906446	17.03	8.3	1.36	1.47	0.98	1
South Sudan	SSU_M206R_I1_D0	microfilaria	PRJNA981587	REPLIG	Illumina DNA	NovaSeq 6000	3408009	150	125	2415645	1625695	0.3365	130008	7902	0.047	104415	44.23	62.05	0.09	0.02	0.42	0.19
South Sudan	SSU_M206R_I1_D0	microfilaria	PRJNA981587	DOPLIFY	Illumina DNA	NovaSeq 6000	1792619	150	125	857981	213628	0.1245	439667	1382	0.0853	394811	4.29	5.49	0.58	0.67	0.44	0.32
South Sudan	SSU_M206R_I2_D0	microfilaria	PRJNA981587	REPLIG	Illumina DNA	NovaSeq 6000	2743866	150	125	1940442	1357783	0.3499	103423	6174	0.0334	84598	26.15	44.51	0.08	0.01	0.1	0.16
South Sudan	SSU_M206R_I2_D0	microfilaria	PRJNA981587	DOPLIFY	Illumina DNA	NovaSeq 6000	1943110	150	125	1393766	464106	0.1665	650325	1729	0.1041	572424	14.59	9.55	0.86	0.92	0.75	0.57
South Sudan	SSU_M206R_I7_D0	microfilaria	PRJNA981587	REPLIG	Illumina DNA	NovaSeq 6000	2202362	150	125	1607147	981101	0.3052	61727	3659	0.046	48362	33.79	56.53	0.04	0.01	0.12	0.18
South Sudan	SSU_M206R_I7_D0	microfilaria	PRJNA981587	DOPLIFY	Illumina DNA	NovaSeq 6000	2512781	150	125	1648916	550396	0.1669	1011309	2860	0.1345	861571	14.14	7.35	1.29	1.24	0.96	0.34
South Sudan	SSU_M206R_J1_D0	microfilaria	PRJNA981587	REPLIG	Illumina DNA	NovaSeq 6000	2001128	150	125	1471625	703532	0.239	261139	28512	0.0377	214778	307.45	97.64	0.25	0	0.12	0.18
South Sudan	SSU_M206R_J1_D0	microfilaria	PRJNA981587	DOPLIFY	Illumina DNA	NovaSeq 6000	2028178	150	125	1424938	489757	0.1719	1190743	3360	0.1217	1026764	22.32	10.99	1.55	1.59	0.94	0.72
South Sudan	SSU_M206R_J2_D0	microfilaria	PRJNA981587	REPLIG	Illumina DNA	NovaSeq 6000	2827152	150	125	2094675	1198318	0.286	91433	5139	0.044	73543	36.72	70.5	0.06	0.01	0.26	0.19
South Sudan	SSU_M206R_J2_D0	microfilaria	PRJNA981587	DOPLIFY	Illumina DNA	NovaSeq 6000	2200103	150	125	1637149	510041	0.1558	1034519	3033	0.1162	898031	14.41	8.45	1.36	1.44	1.71	1.49
South Sudan	SSU_M206R_J3_D0	microfilaria	PRJNA981587	REPLIG	Illumina DNA	NovaSeq 6000	1992696	150	125	1407697	832189	0.2956	69922	4255	0.0376	57110	18.6	33.19	0.06	0.01	0.1	0.16
South Sudan	SSU_M206R_J3_D0	microfilaria	PRJNA981587	DOPLIFY	Illumina DNA	NovaSeq 6000	2065526	150	125	1441617	504682	0.175	770129	2300	0.1202	665191	8.27	7.29	1.01	1.03	0.92	0.43
South Sudan	SSU_M206R_J4_D0	microfilaria	PRJNA981587	REPLIG	Illumina DNA	NovaSeq 6000	1579378	150	125	1187345	648128	0.2729	50961	3661	0.0437	40276	39.11	59.56	0.03	0	0.12	0.16
South Sudan	SSU_M206R_J4_D0	microfilaria	PRJNA981587	DOPLIFY	Illumina DNA	NovaSeq 6000	2572204	150	125	1750661	649835	0.1856	871265	3163	0.1302	744651	24.38	7.31	1.11	1.08	0.9	0.33
South Sudan	SSU_M219R_AD3_D0	microfilaria	PRJNA981587	REPLIG	Illumina DNA	NovaSeq 6000	2541158	150	125	1905791	1105850	0.2901	142834	8095	0.0356	120976	30.59	54.99	0.14	0.01	0.21	0.18
South Sudan	SSU_M219R_AD3_D0	microfilaria	PRJNA981587	DOPLIFY	Illumina DNA	NovaSeq 6000	1989874	150	125	1444852	209292	0.0724	1734814	5931	0.1315	1476522	25.12	10.78	2.24	2.19	1.34	1.52
South Sudan	SSU_M219R_AE3_D0	microfilaria	PRJNA981587	REPLIG	Illumina DNA	NovaSeq 6000	2514842	150	125	1851594	1165563	0.3147	117207	8139	0.0397	95487	63.81	73.22	0.09	0.01	0.25	0.18
South Sudan	SSU_M219R_AE3_D0	microfilaria	PRJNA981587	DOPLIFY	Illumina DNA	NovaSeq 6000	1763357	150	125	1253607	214865	0.0857	1755164	5041	0.1711	1432370	25.59	10.5	2.16	1.85	1.06	0.89
South Sudan	SSU_M219R_AE4_D0	microfilaria	PRJNA981587	REPLIG	Illumina DNA	NovaSeq 6000	2607499	150	125	1916238	870252	0.2271	101475	8895	0.0408	83199	86.58	74.67	0.08	0	0.34	0.18
South Sudan	SSU_M219R_AE4_D0	microfilaria	PRJNA981587	DOPLIFY	Illumina DNA	NovaSeq 6000	1669274	150	125	1098856	141981	0.0646	1729477	4677	0.1955	1369515	27.57	7.96	2.06	1.75	0.74	0.88
South Sudan	SSU_M219R_AE5_D0	microfilaria	PRJNA981587	REPLIG	Illumina DNA	NovaSeq 6000	2464109	150	125	1864850	828187	0.2221	153334	14134	0.0323	127192	132.31	97.21	0.14	0.02	0.23	0.17
South Sudan	SSU_M219R_AE5_D0	microfilaria	PRJNA981587	DOPLIFY	Illumina DNA	NovaSeq 6000	1191229	150	125	828167	191780	0.1158	523177	1239	0.0815	470764	9.91	7.3	0.72	0.84	0.55	0.42
South Sudan	SSU_M219R_D1_D0	microfilaria	PRJNA981587	REPLIG	Illumina DNA	NovaSeq 6000	1493936	150	125	1084601	535513	0.2469	79000	6306	0.0329	65558	44.32	42.43	0.07	0	0.28	0.2
South Sudan	SSU_M219R_D1_D0	microfilaria	PRJNA981587	DOPLIFY	Illumina DNA	NovaSeq 6000	1412157	150	125	868543	181746	0.1046	699809	1903	0.0967	620960	10.76	7.31	0.94	0.99	0.5	0.41
South Sudan	SSU_M219R_D2_D0	microfilaria	PRJNA981587	REPLIG	Illumina DNA	NovaSeq 6000	1206295	150	125	896417	397730	0.2218	197268	32575	0.042	149668	536.52	99.35	0.12	0	0.14	0.16
South Sudan	SSU_M219R_E2_D0	microfilaria	PRJNA981587	REPLIG	Illumina DNA	NovaSeq 6000	1382109	150	125	1030785	439224	0.2131	63325	6607	0.03	50812	76.43	94.72	0.05	0	0.07	0.13
South Sudan	SSU_M219R_E2_D0	microfilaria	PRJNA981587	DOPLIFY	Illumina DNA	NovaSeq 6000	1315599	150	125	900638	186039	0.1033	901886	2966	0.1092	787244	13.48	9.76	1.18	1.2	0.7	0.51
South Sudan	SSU_M219R_E4_D0	microfilaria	PRJNA981587	REPLIG	Illumina DNA	NovaSeq 6000	2063794	150	125	1517677	708863	0.2335	41877	2671	0.0404	33286	27.39	43.1	0.02	0	0.12	0.16
South Sudan	SSU_M219R_E4_D0	microfilaria	PRJNA981587	DOPLIFY	Illumina DNA	NovaSeq 6000	1708006	150	125	1210628	248441	0.1026	1398282	3648	0.1564	1158977	17.28	10.59	1.78	1.59	0.73	0.83
South Sudan	SSU_M219R_E5_D0	microfilaria	PRJNA981587	REPLIG	Illumina DNA	NovaSeq 6000	2595613	150	125	1625811	1135613	0.3492	157850	21217	0.046	121194	295.29	98.03	0.1	0	0.29	0.18
South Sudan	SSU_M219R_E5_D0	microfilaria	PRJNA981587	DOPLIFY	Illumina DNA	NovaSeq 6000	1429782	150	125	958634	104430	0.0545	1514453	4063	0.1431	1278919	17.62	9.27	1.92	1.81	0.57	0.74
South Sudan	SSU_M219R_E6_D0	microfilaria	PRJNA981587	REPLIG	Illumina DNA	NovaSeq 6000	3636573	150	125	2675042	1531830	0.2863	530438	85679	0.0662	392158	1112.56	98.57	0.36	0.05	0.29	0.27
South Sudan	SSU_M219R_E6_D0	microfilaria	PRJNA981587	DOPLIFY	Illumina DNA	NovaSeq 6000	885339	150	125	629553	143384	0.1139	401367	1018	0.0645	368442	6	6.11	0.55	0.66	0.51	0.4
South Sudan	SSU_M219R_F5_D0	microfilaria	PRJNA981587	REPLIG	Illumina DNA	NovaSeq 6000	3444784	150	125	2440799	1958114	0.4011	238151	16121	0.0459	194330	59.95	74.26	0.21	0.02	0.42	0.21
South Sudan	SSU_M219R_F5_D0	microfilaria	PRJNA981587	DOPLIFY	Illumina DNA	NovaSeq 6000	1374785	150	125	1031915	159635	0.0773	1088643	2931	0.1007	962687	11.6	7.36	1.46	1.56	0.91	0.98
South Sudan	SSU_M219R_F6_D0	microfilaria	PRJNA981587	REPLIG	Illumina DNA	NovaSeq 6000	2886808	150	125	2139801	1449595	0.3387	195718	17315	0.0417	158194	193.72	97.17	0.16	0.02	0.3	0.19
South Sudan	SSU_M219R_F6_D0	microfilaria	PRJNA981587	DOPLIFY	Illumina DNA	NovaSeq 6000	2351961	150	125	1737421	323360	0.0931	1726125	4257	0.1466	1443638	17.58	11.42	2.2	2.09	1.41	1.26
South Sudan	SSU_M224_C2_D0	microfilaria	PRJNA981587	DOPLIFY	Illumina Nextera DNA Flex	NextSeq 550	3970788	150	75	2859597	608103	0.1063	5007279	31564	0.112	4366224	95.32	47.4	6.09	5.15	1.54	1.68
South Sudan	SSU_M224_C2_D0	microfilaria	PRJNA981587	DOPLIFY	Illumina Nextera DNA Flex	NovaSeq 6000	5739806	150	75	4652290	1181888	0.127	7854028	59161	0.1533	6541873	143.79	57.97	9.72	6.76	2.56	2.36
South Sudan	SSU_M224_C2_D0	microfilaria	PRJNA981587	-	NEBUltra	NextSeq 550	1497304	150	75	106111	134306	0.6329	6700	321	0.087	4844	0.21	0	0	2.4	0.01	0
South Sudan	SSU_M224_C2_D0	microfilaria	PRJNA981587	-	NEBUltra	NovaSeq 6000	1111185	150	75	213736	315695	0.7385	22232	705	0.4513	8260	0.26	0	0	0	0.02	0
South Sudan	SSU_M224_C2_D0	microfilaria	PRJNA981587	REPLIG	Illumina Nextera DNA Flex	NextSeq 550	8431933	150	75	5230362	3881007	0.371	224344	24005	0.2245	153082	467.61	97.63	0.05	0.01	0.6	0.27
South Sudan	SSU_M224_C2_D0	microfilaria	PRJNA981587	REPLIG	Illumina Nextera DNA Flex	NovaSeq 6000	11467003	150	75	8340851	3890502	0.2332	201968	19886	0.2723	130252	347.62	97.53	0.05	0.01	1.29	0.29
South Sudan	SSU_M224_C4_D0	microfilaria	PRJNA981587	DOPLIFY	Illumina Nextera DNA Flex	NextSeq 550	12967210	150	75	9129374	585489	0.0321	17546498	109216	0.1756	14205534	128.55	61.86	19.73	14.91	16.95	15.85
South Sudan	SSU_M224_C4_D0	microfilaria	PRJNA981587	DOPLIFY	Illumina Nextera DNA Flex	NovaSeq 6000	13039212	150	75	8828345	696269	0.0394	16778299	126111	0.1951	13274859	127.32	60.68	20.2	15.27	17.56	16.15
South Sudan	SSU_M224_C6_D0	microfilaria	PRJNA981587	DOPLIFY	Illumina Nextera DNA Flex	NextSeq 550	2168350	150	75	1508932	341366	0.1131	2621372	16505	0.078	2374289	36.51	10.63	3.25	3.41	1.84	2.41
South Sudan	SSU_M224_C6_D0	microfilaria	PRJNA981587	DOPLIFY	Illumina Nextera DNA Flex	NovaSeq 6000	2161469	150	75	1527886	420266	0.1375	2552121	19033	0.0979	2266238	33.78	12.63	3.37	3.54	1.9	2.42
South Sudan	SSU_M224_C9_D0	microfilaria	PRJNA981587	DOPLIFY	Illumina Nextera DNA Flex	NextSeq 550	3877944	150	75	2694007	1408299	0.2614	3714413	19057	0.1541	3089938	10.22	4.13	4.32	2.8	0.97	1.12
South Sudan	SSU_M224_C9_D0	microfilaria	PRJNA981587	DOPLIFY	Illumina Nextera DNA Flex	NovaSeq 6000	7689441	150	75	6265788	3808034	0.3039	7751189	47510	0.2332	5850847	12.51	5.1	8.74	3.92	2.27	1.68
South Sudan	SSU_M224_C9_D0	microfilaria	PRJNA981587	REPLIG	Illumina Nextera DNA Flex	NextSeq 550	23714824	150	75	14182003	4388398	0.1547	117820	21	0.4325	44407	0.02	0	0.01	0	0	0
South Sudan	SSU_M224_C9_D0	microfilaria	PRJNA981587	REPLIG	Illumina Nextera DNA Flex	NovaSeq 6000	32450811	150	75	21216912	3099051	0.073	78064	17	0.4293	28365	0.02	0	0	0	0	0
South Sudan	SSU_M224_D12_D0	microfilaria	PRJNA981587	DOPLIFY	Illumina Nextera DNA Flex	NextSeq 550	4158337	150	75	2975683	274310	0.0461	5634986	36866	0.1046	4956352	67.54	36.11	6.84	6.76	3.72	4.69
South Sudan	SSU_M224_D12_D0	microfilaria	PRJNA981587	DOPLIFY	Illumina Nextera DNA Flex	NovaSeq 6000	5192656	150	75	3819096	440517	0.0577	7116443	56506	0.1426	5999067	79.44	51.25	8.97	8.3	5.05	6.09
South Sudan	SSU_M224_D12_D0	microfilaria	PRJNA981587	REPLIG	Illumina Nextera DNA Flex	NextSeq 550	3824737	150	75	2505778	2110020	0.421	450707	139534	0.2444	317402	2277.46	99.89	0.01	0	0.04	0
South Sudan	SSU_M224_D12_D0	microfilaria	PRJNA981587	REPLIG	Illumina Nextera DNA Flex	NovaSeq 6000	4765380	150	75	3410850	2142598	0.3141	349279	120050	0.2541	243000	1872.93	99.75	0.01	0	0.06	0
South Sudan	SSU_M224_D6_D0	microfilaria	PRJNA981587	DOPLIFY	Illumina Nextera DNA Flex	NextSeq 550	3515695	150	75	2472002	309063	0.0625	4573896	24806	0.09	4067066	44.86	17.57	5.77	5.59	2.21	8.38
South Sudan	SSU_M224_D6_D0	microfilaria	PRJNA981587	DOPLIFY	Illumina Nextera DNA Flex	NovaSeq 6000	4668375	150	75	3709988	541628	0.073	6707760	42732	0.121	5763859	56.2	24.64	8.79	7.35	3.42	10.18
South Sudan	SSU_M224_D6_D0	microfilaria	PRJNA981587	REPLIG	Illumina Nextera DNA Flex	NextSeq 550	19952747	150	75	12268792	9594123	0.391	5313856	725342	0.1847	3591294	8681.49	99.97	3.19	2.34	1.72	14.09
South Sudan	SSU_M224_D6_D0	microfilaria	PRJNA981587	REPLIG	Illumina Nextera DNA Flex	NovaSeq 6000	21429623	150	75	13609599	7499895	0.2755	3547831	527419	0.1439	2489961	6559.53	99.99	2.45	1.65	1.61	10.8
South Sudan	SSU_M224_L11_D0	microfilaria	PRJNA981587	REPLIG	Illumina Nextera DNA Flex	NextSeq 550	1633287	150	75	1493232	1827	0.0006	2977367	1025528	0.2613	2113499	14762.2	100	0.61	0.5	0.2	0.08
South Sudan	SSU_M224_L13_D0	microfilaria	PRJNA981587	REPLIG	Illumina Nextera DNA Flex	NextSeq 550	1301095	150	75	1199594	325374	0.1356	1076780	259492	0.116	924606	4399.19	99.9	0.62	0.11	0.38	0
South Sudan	SSU_M224_L13_D120	microfilaria	PRJNA981587	REPLIG	Illumina Nextera DNA Flex	NextSeq 550	1544421	150	75	1405495	1591	0.0006	2798729	1457994	0.2418	1946373	16286.6	100	0	0	0	0
South Sudan	SSU_M224_L14_D0	microfilaria	PRJNA981587	REPLIG	Illumina Nextera DNA Flex	NextSeq 550	1648518	150	75	1497445	29864	0.01	2811323	1107088	0.2843	1912692	16164.5	100	0.08	0.04	0.11	0.01
South Sudan	SSU_M224_L15_D0	microfilaria	PRJNA981587	REPLIG	Illumina Nextera DNA Flex	NextSeq 550	1405334	150	75	1283445	1479	0.0006	2557901	1106568	0.3117	1675053	14046.3	100	0.05	0.02	0.02	0
South Sudan	SSU_M224_L16_D0	microfilaria	PRJNA981587	REPLIG	Illumina Nextera DNA Flex	NextSeq 550	1701027	150	75	1553352	2294	0.0007	3094383	1322027	0.2743	2120579	17823.3	100	0.08	0.04	0.11	0.05
South Sudan	SSU_M224_L17_D0	microfilaria	PRJNA981587	REPLIG	Illumina Nextera DNA Flex	NextSeq 550	1687991	150	75	1534488	26126	0.0085	2915390	1207004	0.2867	1946834	15694.1	100	0.17	0.06	0.42	0
South Sudan	SSU_M224_L18_D0	microfilaria	PRJNA981587	REPLIG	Illumina Nextera DNA Flex	NextSeq 550	1409577	150	75	1291707	69952	0.0271	2256645	519706	0.1306	1889472	7618.02	99.99	1.5	0.97	0.59	0.21
South Sudan	SSU_M224_L21_D0	microfilaria	PRJNA981587	REPLIG	Illumina Nextera DNA Flex	NextSeq 550	2864955	150	75	2610601	1199248	0.2297	175737	50353	0.1181	144922	1067.7	99.58	0.03	0.02	0	0
South Sudan	SSU_M224_L22_D0	microfilaria	PRJNA981587	REPLIG	Illumina Nextera DNA Flex	NextSeq 550	3055243	150	75	2781561	410676	0.0738	3885015	176563	0.3408	2531154	1439.8	98.57	3.58	1.29	0.02	0
South Sudan	SSU_M224_L22_D120	microfilaria	PRJNA981587	REPLIG	Illumina NexteraFlexDNA	NovaSeq 6000	1201122	150	125	1049923	348803	0.1661	45865	15670	0.1006	37300	268.1	99.35	0	0	0.03	0.07
South Sudan	SSU_M224_L23_D0	microfilaria	PRJNA981587	REPLIG	Illumina Nextera DNA Flex	NextSeq 550	2182701	150	75	1994237	3944	0.001	3969273	1587584	0.3472	2487797	21078	100	0.07	0.05	0.03	0
South Sudan	SSU_M224_L24_D0	microfilaria	PRJNA981587	REPLIG	Illumina NexteraFlexDNA	NovaSeq 6000	1460879	150	125	1253215	344156	0.1373	33629	5766	0.0747	28187	91.75	87.75	0.02	0	0.02	0
South Sudan	SSU_M224_L25_D0	microfilaria	PRJNA981587	REPLIG	Illumina Nextera DNA Flex	NextSeq 550	2825706	150	75	2492028	11438	0.0023	4946988	1666589	0.4951	2362568	18247.1	100	0.28	0.19	0.58	0.12
South Sudan	SSU_M224_L25_D120	microfilaria	PRJNA981587	REPLIG	Illumina NexteraFlexDNA	NovaSeq 6000	1536753	150	125	1328599	457104	0.172	17210	1866	0.2434	10759	37.22	77.22	0	0	0	0
South Sudan	SSU_M224_L26_D0	microfilaria	PRJNA981587	REPLIG	Illumina Nextera DNA Flex	NextSeq 550	2314820	150	75	2099369	4530	0.0011	4176138	1609857	0.3708	2522040	21618.2	100	0.04	0.03	0	0
South Sudan	SSU_M224_L26_D120	microfilaria	PRJNA981587	REPLIG	Illumina Nextera DNA Flex	NextSeq 550	1734555	150	75	1577451	1655	0.0005	3142392	1683571	0.2962	2234814	18507.4	100	0	0	0	0
South Sudan	SSU_M224_L27_D0	microfilaria	PRJNA981587	REPLIG	Illumina NexteraFlexDNA	NovaSeq 6000	1659427	150	125	1286351	26985	0.0105	2535909	1249977	0.2595	1788816	15466.7	100	0.02	0.02	0	0
South Sudan	SSU_M224_L31_D0	microfilaria	PRJNA981587	REPLIG	Illumina Nextera DNA Flex	NextSeq 550	1238469	150	75	1104805	1065	0.0005	2203396	843873	0.2829	1520482	12771.8	99.96	0.07	0.06	0.41	0.62
South Sudan	SSU_M224_L32_D0	microfilaria	PRJNA981587	REPLIG	Illumina Nextera DNA Flex	NextSeq 550	1875083	150	75	1701305	5892	0.0017	3377950	1304903	0.3051	2221037	17620.6	100	0.27	0.08	0.24	0
South Sudan	SSU_M224_L32_D120	microfilaria	PRJNA981587	REPLIG	Illumina NexteraFlexDNA	NovaSeq 6000	1933501	150	125	913498	6044	0.0033	42356	23176	0.0513	39004	342.08	97.19	0	0	0	0
South Sudan	SSU_M224_L34_D0	microfilaria	PRJNA981587	REPLIG	Illumina Nextera DNA Flex	NextSeq 550	1116547	150	75	1029573	409383	0.1988	24974	1708	0.1226	20024	30.18	89.36	0.02	0	0.03	0
South Sudan	SSU_M224_L35_D0	microfilaria	PRJNA981587	REPLIG	Illumina Nextera DNA Flex	NextSeq 550	2640287	150	75	2255563	26584	0.0059	4458670	1573563	0.3922	2578078	20433.3	100	0.27	0.2	0.14	0.25
South Sudan	SSU_M224_L35_D120	microfilaria	PRJNA981587	REPLIG	Illumina Nextera DNA Flex	NextSeq 550	2415572	150	75	2205927	4242	0.001	4391778	2446418	0.2642	3026239	24731.3	100	0	0	0	0
South Sudan	SSU_M224_L36_D0	microfilaria	PRJNA981587	REPLIG	Illumina Nextera DNA Flex	NextSeq 550	2197309	150	75	1967705	72484	0.0184	3839084	1439076	0.3812	2255355	19078	100	0.08	0.05	0.01	0
South Sudan	SSU_M224_L37_D0	microfilaria	PRJNA981587	REPLIG	Illumina Nextera DNA Flex	NextSeq 550	1558706	150	75	1410608	1492	0.0005	2810635	1403388	0.2096	2087556	17396.7	100	0.04	0.03	0	0
South Sudan	SSU_M224_L37_D120	microfilaria	PRJNA981587	REPLIG	Illumina NexteraFlexDNA	NovaSeq 6000	1268336	150	125	1085932	288254	0.1327	31667	10473	0.2198	22648	176.58	89.02	0	0	0	0
South Sudan	SSU_M224_L38_D0	microfilaria	PRJNA981587	REPLIG	Illumina Nextera DNA Flex	NextSeq 550	1355091	150	75	1247390	432625	0.1734	359793	38026	0.0636	331296	626.19	98.12	0.39	0.33	0.07	0
South Sudan	SSU_M224_L38_D120	microfilaria	PRJNA981587	REPLIG	Illumina Nextera DNA Flex	NextSeq 550	4909381	150	75	4438200	13703	0.0015	8826262	2986883	0.4582	4539722	39995.6	100	0.01	0.01	0.01	0
South Sudan	SSU_M224_L42_D0	microfilaria	PRJNA981587	REPLIG	Illumina Nextera DNA Flex	NextSeq 550	2275613	150	75	2018326	5011	0.0012	4015787	1419275	0.3728	2418109	20357.3	100	0.1	0.09	0.03	0
South Sudan	SSU_M224_L43_D0	microfilaria	PRJNA981587	REPLIG	Illumina Nextera DNA Flex	NextSeq 550	1559077	150	75	1433553	1537	0.0005	2858187	1044630	0.2957	1935930	16360.3	100	0.12	0.11	0.01	0
South Sudan	SSU_M224_L44_D0	microfilaria	PRJNA981587	REPLIG	Illumina Nextera DNA Flex	NextSeq 550	1383555	150	75	1264258	1683	0.0007	2518164	950587	0.2703	1773423	15159.9	99.99	0.08	0.06	0	0
South Sudan	SSU_M224_L45_D0	microfilaria	PRJNA981587	REPLIG	Illumina Nextera DNA Flex	NextSeq 550	2449547	150	75	2130931	5936	0.0014	4238472	1456366	0.3821	2515046	20971	100	0.14	0.11	0.12	0.21
South Sudan	SSU_M224_L45_D120	microfilaria	PRJNA981587	REPLIG	Illumina NexteraFlexDNA	NovaSeq 6000	1149089	150	125	840684	312	0.0002	1678458	915599	0.1933	1286608	11032.7	100	0	0	0	0
South Sudan	SSU_M224_L46_D0	microfilaria	PRJNA981587	REPLIG	Illumina Nextera DNA Flex	NextSeq 550	2590031	150	75	2233111	5820	0.0013	4444176	1511747	0.3944	2561222	21084.3	100	0.18	0.14	0.08	0.04
South Sudan	SSU_M238_F4_D0	microfilaria	PRJNA981587	DOPLIFY	Illumina Nextera DNA Flex	NextSeq 550	4943699	150	75	3451246	2558106	0.3706	3586414	19343	0.1367	3044214	37.17	8.79	4.34	3.08	1.44	1.39
South Sudan	SSU_M238_F4_D0	microfilaria	PRJNA981587	DOPLIFY	Illumina Nextera DNA Flex	NovaSeq 6000	6572650	150	75	5167680	4100588	0.3968	4572158	27221	0.1645	3755715	45.74	8.79	5.72	3.59	2.18	1.71
South Sudan	SSU_M238_F4_D0	microfilaria	PRJNA981587	REPLIG	Illumina Nextera DNA Flex	NextSeq 550	9461383	150	75	6026097	4670940	0.3876	201413	9781	0.3946	108266	193.84	95.4	0.06	0.03	2.83	1.5
South Sudan	SSU_M238_F4_D0	microfilaria	PRJNA981587	REPLIG	Illumina Nextera DNA Flex	NovaSeq 6000	12407282	150	75	9171845	4951629	0.2699	199479	8666	0.4873	89756	151.75	95.29	0.05	0.03	2.34	1.58
South Sudan	SSU_M238_L11_D0	microfilaria	PRJNA981587	REPLIG	Illumina Nextera DNA Flex	NextSeq 550	1484024	150	75	1364998	1667	0.0006	2721165	920685	0.2549	1954239	13924.5	100	0.48	0.26	4.86	0.74
South Sudan	SSU_M238_L11_D120	microfilaria	PRJNA981587	REPLIG	Illumina Nextera DNA Flex	NextSeq 550	1148738	150	75	1051758	399421	0.1899	34540	10386	0.116	29113	216.91	99.37	0	0	0.01	0
South Sudan	SSU_M238_L12_D0	microfilaria	PRJNA981587	REPLIG	Illumina Nextera DNA Flex	NextSeq 550	2694120	150	75	2380293	6801	0.0014	4736074	1632424	0.3746	2836071	22969.2	100	0.26	0.21	1.61	2.24
South Sudan	SSU_M238_L13_D0	microfilaria	PRJNA981587	REPLIG	Illumina Nextera DNA Flex	NextSeq 550	2024444	150	75	1799941	26280	0.0073	3522659	1183192	0.3457	2230426	18092.1	100	0.25	0.19	0.02	0
South Sudan	SSU_M238_L13_D120	microfilaria	PRJNA981587	REPLIG	Illumina Nextera DNA Flex	NextSeq 550	1094319	150	75	1016632	307854	0.1514	21236	4718	0.3117	16703	100.5	98	0	0	0	0
South Sudan	SSU_M238_L14_D0	microfilaria	PRJNA981587	REPLIG	Illumina Nextera DNA Flex	NextSeq 550	1315478	150	75	1213904	361566	0.1489	86510	25188	0.0575	77488	434.99	99.5	0.03	0.03	0.2	0.29
South Sudan	SSU_M238_L14_D120	microfilaria	PRJNA981587	REPLIG	Illumina Nextera DNA Flex	NextSeq 550	1015516	150	75	190144	313694	0.8249	55304	20125	0.2743	48327	379.65	99.53	0	0	0	0
South Sudan	SSU_M238_L15_D0	microfilaria	PRJNA981587	REPLIG	Illumina Nextera DNA Flex	NextSeq 550	1543888	150	75	1419858	944209	0.3325	53078	4874	0.0509	47727	62.28	96.7	0.05	0.03	0.05	0
South Sudan	SSU_M238_L16_D0	microfilaria	PRJNA981587	REPLIG	Illumina Nextera DNA Flex	NextSeq 550	1350811	150	75	1239532	217196	0.0876	999823	42468	0.0617	926199	294.59	97.64	1.32	0.79	1.48	0.27
South Sudan	SSU_M238_L16_D120	microfilaria	PRJNA981587	REPLIG	Illumina Nextera DNA Flex	NextSeq 550	1145927	150	75	1054684	316676	0.1501	27993	5548	0.1306	18873	110.78	96.59	0	0	0	0
South Sudan	SSU_M238_L17_D0	microfilaria	PRJNA981587	REPLIG	Illumina Nextera DNA Flex	NextSeq 550	1191531	150	75	1104020	343669	0.1556	437552	16913	0.0374	410392	68.52	96.85	0.58	0.18	0.73	0.13
South Sudan	SSU_M238_L18_D0	microfilaria	PRJNA981587	REPLIG	Illumina Nextera DNA Flex	NextSeq 550	1424750	150	75	1316721	363140	0.1379	576094	298869	0.1001	491137	4083.02	99.98	0.01	0.01	0	0
South Sudan	SSU_M238_L18_D120	microfilaria	PRJNA981587	REPLIG	Illumina Nextera DNA Flex	NextSeq 550	1306827	150	75	1208016	501748	0.2077	17216	1730	0.3408	10440	37.44	72.57	0	0	0.02	0.03
South Sudan	SSU_M238_L21_D120	microfilaria	PRJNA981587	REPLIG	Illumina Nextera DNA Flex	NextSeq 550	1586976	150	75	1472034	412854	0.1402	20567	1026	0.2112	14134	21.69	52.61	0.01	0	0	0
South Sudan	SSU_M238_R14_D0	microfilaria	PRJNA981587	REPLIG	Illumina Nextera DNA Flex	NextSeq 550	1974209	150	75	1811326	11977	0.0033	3594599	490921	0.1332	3067111	5350.8	98.57	3.15	3.01	32.97	13.71
South Sudan	SSU_M238_R15_D0	microfilaria	PRJNA981587	REPLIG	Illumina Nextera DNA Flex	NextSeq 550	1780313	150	75	1631612	1415	0.0004	3259553	162403	0.6619	1101421	11.29	4.78	1.67	0.05	0.01	0
South Sudan	SSU_M238_R16_D0	microfilaria	PRJNA981587	REPLIG	Illumina Nextera DNA Flex	NextSeq 550	1543297	150	75	943157	1668566	0.8846	174122	48255	0.0479	161244	903.53	97.58	0.09	0.03	0.06	0
South Sudan	SSU_M238_R17_D0	microfilaria	PRJNA981587	REPLIG	Illumina Nextera DNA Flex	NextSeq 550	1573451	150	75	1429751	5401	0.0019	2843433	216673	0.0519	2652070	824.21	98.57	3.64	3.12	8.22	10.08
South Sudan	SSU_M238_R22_D0	microfilaria	PRJNA981587	REPLIG	Illumina Nextera DNA Flex	NextSeq 550	1925934	150	75	1717609	7526	0.0022	3418947	169476	0.0621	3158313	875.94	98.13	4.14	3.39	22.35	23.6
South Sudan	SSU_M238_R24_D0	microfilaria	PRJNA981587	REPLIG	Illumina Nextera DNA Flex	NextSeq 550	2070737	150	75	1851447	3918	0.0011	3691184	895736	0.2651	2568852	11459.8	99.93	1.41	1.02	25.61	11.54
South Sudan	SSU_M238_R25_D0	microfilaria	PRJNA981587	REPLIG	Illumina Nextera DNA Flex	NextSeq 550	1712080	150	75	1526942	12214	0.004	3029967	573367	0.1619	2480147	7861.97	99.93	2.13	1.98	9.05	11.81
South Sudan	SSU_M238_R26_D0	microfilaria	PRJNA981587	REPLIG	Illumina Nextera DNA Flex	NextSeq 550	1550291	150	75	1397783	1037815	0.3712	564210	153362	0.2334	425699	2223.97	97.88	0.22	0.06	0.01	0
South Sudan	SSU_M238_R27_D0	microfilaria	PRJNA981587	REPLIG	Illumina Nextera DNA Flex	NextSeq 550	2072937	150	75	1844516	4195	0.0011	3676421	953856	0.2714	2582499	12337.7	99.97	1.55	1.3	8.67	8.49
South Sudan	SSU_M238_R31_D0	microfilaria	PRJNA981587	REPLIG	Illumina Nextera DNA Flex	NextSeq 550	1750392	150	75	1593718	2733	0.0009	3177942	305293	0.115	2764521	4096.89	99.46	3.37	2.49	5.73	8.03
South Sudan	SSU_M238_R32_D0	microfilaria	PRJNA981587	REPLIG	Illumina Nextera DNA Flex	NextSeq 550	1419291	150	75	1301020	2188	0.0008	2594233	197541	0.0991	2313324	2263	98.57	2.92	2.34	9.11	3.72
South Sudan	SSU_M238_R35_D0	microfilaria	PRJNA981587	REPLIG	Illumina Nextera DNA Flex	NextSeq 550	1709437	150	75	1564470	1449	0.0005	3120064	1201196	0.2707	2185447	17586	100	0.21	0.19	3.45	1.77
South Sudan	SSU_M238_R36_D0	microfilaria	PRJNA981587	REPLIG	Illumina Nextera DNA Flex	NextSeq 550	1666270	150	75	1513920	4512	0.0015	3012443	239821	0.081	2729417	2734.92	99.46	3.38	2.85	3.42	3.42
South Sudan	SSU_M238_R37_D0	microfilaria	PRJNA981587	REPLIG	Illumina Nextera DNA Flex	NextSeq 550	1532616	150	75	1399655	9270	0.0033	2731347	985025	0.2188	2053725	14345.4	100	0.52	0.41	1.18	0.89
South Sudan	SSU_K038_L35_D0	microfilaria	PRJNA981587	REPLIG	Illumina NexteraFlexDNA	NovaSeq 6000	1802901	150	125	1561012	190851	0.0611	58256	6438	0.1118	50586	166.33	98.99	0.03	0	0.97	0.25
South Sudan	SSU_K038_L47_D0	microfilaria	PRJNA981587	REPLIG	Illumina NexteraFlexDNA	NovaSeq 6000	2279750	150	125	1967006	482520	0.1227	84963	4168	0.106	73536	86.2	96.87	0.07	0	1.2	0.25
South Sudan	SSU_K038_L51_D0	microfilaria	PRJNA981587	REPLIG	Illumina NexteraFlexDNA	NovaSeq 6000	1386251	150	125	1062136	86506	0.0407	556228	167822	0.1163	477213	3407.54	99.97	0.16	0.12	0.47	0.21
Benin	BEN_SOU_IDBE1_K4	adult	PRJNA289926	-	KAPA LTP	HiSeq	87210834	100	60	72932734	5466169	0.0375	120163591	137288	0.1309	102754128	2941.26	99.21	94.04	91.97	852.52	99.78
Cameroon	CAM_01_24_N1_F1_D80	adult	PRJNA981587	-	Illumina DNAFlex	NextSeq 550	19006404	150	125	10208700	19700496	0.9649	580297	1793	0.2212	443050	674.61	98.57	0.23	0	18.16	38.92
Cameroon	CAM_01_28_N1_F2_D80	adult	PRJNA981587	-	Illumina DNAFlex	NextSeq 550	22539159	150	125	17610861	34787114	0.9877	280298	1038	0.3084	185957	51.08	96.9	0.08	0	0.05	0
Cameroon	CAM_01_35_N1F1_D80	adult	PRJNA981587	REPLIG	Illumina DNAFlex	NextSeq 550	8781380	150	125	6184541	1130147	0.0914	11054871	262723	0.0407	10466890	1227.65	98.57	14.18	21.31	290.18	99.7
Cameroon	CAM_01_35_N1F2_D80	adult	PRJNA981587	-	Illumina DNAFlex	NextSeq 550	28514017	150	125	22175188	709675	0.016	43465673	71331	0.0528	40590221	2548.75	99.59	62.34	93.12	2.53	0.45
Cameroon	CAM_02_08_N1_F1_D80	adult	PRJNA981587	-	Illumina DNAFlex	NextSeq 550	15127606	150	125	9151728	16830086	0.9195	658938	1816	0.1129	1160809	279.7	97.99	0.13	0	148.75	99.59
Cameroon	CAM_02_08_N3F2_D80	adult	PRJNA981587	-	Illumina DNAFlex	NextSeq 550	23857141	150	125	11120888	19719479	0.8866	1191172	5681	0.0784	2169556	1571.07	98.77	2.35	0.03	67.31	99.47
Cameroon	CAM_02_08_N3F3_D80	adult	PRJNA981587	-	Illumina DNAFlex	NextSeq 550	18942982	150	125	10258260	13212532	0.644	7204317	13249	0.0508	6743289	830.06	98.57	7.85	0.83	244.51	99.61
Cameroon	CAM_03_09_N2F1_D80	adult	PRJNA981587	-	Illumina DNAFlex	NextSeq 550	32834379	150	125	24928606	2266337	0.0455	47499842	119232	0.0712	43412741	3178.17	99.19	67.12	92.96	1.36	1.22
Cameroon	CAM_03_09_N2F2_D80	adult	PRJNA981587	-	Illumina DNAFlex	NextSeq 550	24026919	150	125	11445557	11886286	0.5193	10873221	23116	0.0598	10083011	2018.04	99.04	12.4	9.92	290.77	99.65
Cameroon	CAM_04_15_N1F3_D80	adult	PRJNA981587	-	Illumina DNAFlex	NextSeq 550	16408161	150	125	10610497	12106248	0.5705	8835323	16094	0.0469	8306392	523.33	98.57	9.66	3.18	298.14	99.67
Cameroon	CAM_04_15_N1F3_D80	adult	PRJNA981587	REPLIG	Illumina DNAFlex	NextSeq 550	9130892	150	125	6024344	232392	0.0193	11786284	214898	0.0441	11124069	2540.36	98.96	13.98	22.48	162.5	99.71
Cameroon	CAM_04_89_N1F1_D80	adult	PRJNA981587	-	Illumina DNAFlex	NextSeq 550	18462143	150	125	14240271	22588269	0.7931	5047862	12032	0.031	4822063	571.16	99.19	6.86	0.34	40.66	98.98
Cameroon	CAM_05_04_N1_F1_D80	adult	PRJNA981587	REPLIG	Illumina DNAFlex	NextSeq 550	7553083	150	125	4651379	5721176	0.615	3386960	144279	0.1807	2748653	3105.24	99.04	0.14	0.01	362.35	99.73
Cameroon	CAM_05_04_N2_F1_D80	adult	PRJNA981587	-	Illumina DNAFlex	NextSeq 550	16765429	150	125	10369487	17665974	0.8518	909417	1753	0.082	821158	371.02	98.4	0.28	0.01	81.14	99.53
Cameroon	CAM_05_07_N1F1_D80	adult	PRJNA981587	-	Illumina DNAFlex	NextSeq 550	19969478	150	125	15459937	10098923	0.3266	18613268	46596	0.0394	17636452	940.69	99.55	24.65	71.34	225.32	99.75
Cameroon	CAM_05_08_N1_F1_D80	adult	PRJNA981587	-	Illumina DNAFlex	NextSeq 550	21552749	150	125	16916424	29814547	0.8812	3808600	4635	0.1379	3257487	673.4	98.96	0.46	0.01	427.7	99.75
Cameroon	CAM_05_08_N1_F3_D80	adult	PRJNA981587	-	Illumina DNAFlex	NextSeq 550	21795210	150	125	16969074	32596615	0.9605	1080015	1789	0.1434	910181	253.92	98.57	0.23	0	88.83	99.62
Cameroon	CAM_05_08_N3_F1_D80	adult	PRJNA981587	-	Illumina DNAFlex	NextSeq 550	20020169	150	125	15475805	30115595	0.973	684467	1784	0.1528	567599	575.05	98.96	0.32	0	25.97	79.75
Cameroon	CAM_05_18_N1_F1_D80	adult	PRJNA981587	-	Illumina DNAFlex	NextSeq 550	23539488	150	125	18408994	35344374	0.96	1066231	2432	0.1016	944482	476.25	98.53	0.25	0	98.07	99.64
Cameroon	CAM_05_39_N1_F1_D80	adult	PRJNA981587	-	Illumina DNAFlex	NextSeq 550	7809036	150	125	6085700	11110724	0.9129	815903	1598	0.0575	757924	545.06	98.89	0.63	0	38.21	98.73
Cameroon	CAM_05_57_N1_F1_D80	adult	PRJNA981587	-	Illumina DNAFlex	NextSeq 550	18425019	150	125	10110827	18936779	0.9365	1125450	2565	0.0731	1026525	348.16	98.57	0.81	0.01	60.76	99.43
Cameroon	CAM_05_89_N1F1_D80	adult	PRJNA981587	-	Illumina DNAFlex	NextSeq 550	22206012	150	125	10545103	16330172	0.7743	4606679	10322	0.077	4195449	1887.25	98.97	4.09	0.08	204.46	99.64
Cameroon	CAM_06_07_N3_F1_D80	adult	PRJNA981587	REPLIG	Illumina DNAFlex	NextSeq 550	7615415	150	125	4910134	9711371	0.9889	35247	3483	0.0652	31985	163.9	97.7	0.01	0	0.35	0
Cameroon	CAM_06_12_N2_F1_D80	adult	PRJNA981587	-	Illumina DNAFlex	NextSeq 550	18485527	150	125	10156955	18405054	0.906	1744713	2713	0.1069	1543352	452.21	98.49	0.29	0	190.93	99.56
Cameroon	CAM_06_27_N1_F1_D80	adult	PRJNA981587	-	Illumina DNAFlex	NextSeq 550	24049895	150	125	18333839	34220993	0.9333	2196638	2963	0.1063	1945474	954.89	99.55	0.33	0	244.61	99.75
Cameroon	CAM_06_27_N1_F2_D80	adult	PRJNA981587	-	Illumina DNAFlex	NextSeq 550	17124824	150	125	13006325	25407948	0.9768	470406	1136	0.1041	413874	189.67	98.57	0.17	0	35.16	98.04
Cameroon	CAM_06_27_N1_F3_D80	adult	PRJNA981587	-	Illumina DNAFlex	NextSeq 550	18694166	150	125	14382467	28463818	0.9895	172754	743	0.2636	121940	39.34	96.15	0.03	0	6.05	0.02
Cameroon	CAM_06_57_N1F3_D80	adult	PRJNA981587	-	Illumina DNAFlex	NextSeq 550	9677644	150	125	6790060	2164816	0.1594	10913998	413041	0.0494	10234801	3369.96	98.96	12.96	17.7	223.76	99.7
Cameroon	CAM_07_39_N1_F1_D80	adult	PRJNA981587	REPLIG	Illumina DNAFlex	NextSeq 550	8322857	150	125	5217217	7578666	0.7263	2755766	244404	0.2518	2026646	6792.08	99.55	0.65	0.02	142.25	99.69
Cameroon	CAM_09_06_N1_F1_D80	adult	PRJNA981587	-	Illumina DNAFlex	NextSeq 550	27050160	150	125	12614668	13028227	0.5164	11592058	14947	0.2835	8238075	2349.58	99.19	0.71	3.49	1172.45	0.12
Cameroon	CAM_09_11_N1_F1_D80	adult	PRJNA981587	-	Illumina DNAFlex	NextSeq 550	24868182	150	125	18973517	36615643	0.9649	907454	3317	0.2979	616639	482.7	98.99	0.52	0.01	5.86	99.75
Cameroon	CAM_09_24_N1F1_D80	adult	PRJNA981587	-	Illumina DNAFlex	NextSeq 550	21883500	150	125	11774366	10249857	0.4353	12748673	21778	0.0793	11584913	2415.85	99.04	12.97	0	469.33	0.25
Cameroon	CAM_10_06_N1F1_D80	adult	PRJNA981587	-	Illumina DNAFlex	NextSeq 550	23618170	150	125	18302562	32798921	0.896	3509774	6015	0.0661	3235686	418.66	98.69	3.83	12.31	92.81	99.71
Cameroon	CAM_10_52_N1_F2_D80	adult	PRJNA981587	-	Illumina DNAFlex	NextSeq 550	16432273	150	125	12731844	25068937	0.9845	305938	1020	0.1271	259104	350.27	98.57	0.26	0.05	0.02	99.65
Cameroon	CAM_13_01_N1_F3_D80	adult	PRJNA981587	-	Illumina DNAFlex	NextSeq 550	27982314	150	125	11056684	18420290	0.833	3395591	3348	0.1286	2932374	690.42	98.57	0.64	0	368.85	0
Cameroon	CAM_13_32_N2_F1_D80	adult	PRJNA981587	-	Illumina DNAFlex	NextSeq 550	16863146	150	125	9366858	17363500	0.9269	1014263	2680	0.0838	914723	807.75	98.57	0.77	3.49	40.95	0.26
Cameroon	CAM_13_43_N1F1_D80	adult	PRJNA981587	-	Illumina DNAFlex	NextSeq 550	17034631	150	125	10091906	7905848	0.3917	12202933	21685	0.0919	10949400	1509.98	98.96	10.9	3.34	576.67	0.17
Cameroon	CAM_13_62_N1_F1_D80	adult	PRJNA981587	-	Illumina DNAFlex	NextSeq 550	19815106	150	125	15360413	30046683	0.9781	491843	1425	0.2042	381652	255.26	98.57	0.16	0.01	23.77	99.7
Cameroon	CAM_13_62_N1_F3_D80	adult	PRJNA981587	-	Illumina DNAFlex	NextSeq 550	1279603	150	125	991757	1942005	0.9791	32307	210	0.0594	29571	22.45	73.04	0.02	0.01	1.13	98.34
Cameroon	CAM_13_62_N1_F3_D80	adult	PRJNA981587	-	Illumina DNAFlex	NextSeq 550	20906298	150	125	16318352	31878915	0.9768	587152	2134	0.1691	476184	342.81	98.6	0.33	7.79	20.46	99.72
Cameroon	CAM_13_62_N2F1_D80	adult	PRJNA981587	-	Illumina DNAFlex	NextSeq 550	16553814	150	125	10335385	19129358	0.9254	1446949	3014	0.0666	1332600	298.66	98.34	0.84	0	109.77	73.17
Cote d'Ivoire	COT_AHI_1091a	adult	PRJNA289926	-	Lucigen ER, NEB reagents	HiSeq	38563542	100	60	18504305	16467036	0.445	17083642	27739	0.0576	15802124	595.55	97.93	14.72	26.45	81.89	96.18
Cote d'Ivoire	COT_GRO_C1	adult	PRJNA560089	-	Illumina Illumina TruSeq DNA HT	MiSeq	not available	250	100	118982	3474	0.0146	234378	3895	0.1617	195830	921.26	96.33	0.01	0	0	0
Cote d'Ivoire	COT_GRO_C22	adult	PRJNA560089	-	Illumina Illumina TruSeq DNA HT	MiSeq	not available	250	100	206032	18923	0.0459	392910	8133	0.1192	344263	2727.76	96.51	0.06	0	0	0
Cote d'Ivoire	COT_GRO_C34A	adult	PRJNA560089	-	Illumina Illumina TruSeq DNA HT	MiSeq	not available	250	100	234479	999	0.0021	467850	3813	0.2179	364953	713	96.34	0.01	0.01	0	0
Cote d'Ivoire	COT_GRO_C34B	adult	PRJNA560089	-	Illumina Illumina TruSeq DNA HT	MiSeq	not available	250	100	180654	1051	0.0029	360097	4406	0.162	300664	1816.09	96.52	0	0	0	0
Cote d'Ivoire	COT_GRO_C41	adult	PRJNA560089	-	Illumina Illumina TruSeq DNA HT	MiSeq	not available	250	100	121314	325	0.0013	242246	3016	0.1378	207961	1064.73	96.3	0	0	0	0
Côte d'Ivoire	COT_GRO_C41	adult	PRJNA997216	-	NEBNext	HiSeq 2500	8689625	100	75	3194738	707945	0.1108	5631819	11093	0.0436	5281741	1280	99	6.17	0.42	14.32	13.91
Cote d'Ivoire	COT_GRO_C45	adult	PRJNA560089	-	Illumina Illumina TruSeq DNA HT	MiSeq	not available	250	100	139973	86	0.0003	279822	2618	0.1667	232559	457.45	96.25	0	0	0	0
Cote d'Ivoire	COT_GRO_C49	adult	PRJNA560089	-	Illumina Illumina TruSeq DNA HT	MiSeq	not available	250	100	158724	738	0.0023	316645	4094	0.1472	269130	1617.76	96.4	0.01	0	0	0
Cote d'Ivoire	COT_GRO_C55	adult	PRJNA560089	-	Illumina Illumina TruSeq DNA HT	MiSeq	not available	250	100	228923	904	0.002	456745	13603	0.1503	385621	3962.43	96.6	0	0	0	0
Côte d'Ivoire	COT_GRO_C55	adult	PRJNA997216	-	NEBNext	HiSeq 2500	6614297	100	75	2120228	3455266	0.8148	750951	2088	0.0108	724818	168	94.1	0.82	0.01	2.27	0
Cote d'Ivoire	COT_GRO_C63	adult	PRJNA560089	-	Illumina Illumina TruSeq DNA HT	MiSeq	not available	250	100	158718	71	0.0002	317305	4289	0.1346	273565	1310.43	97.94	0	0	0	0
Cote d'Ivoire	COT_GRO_C7	adult	PRJNA560089	-	Illumina Illumina TruSeq DNA HT	MiSeq	not available	250	100	218233	373	0.0009	435989	3889	0.1466	362030	1894.18	96.52	0	0	0	0
Cote d'Ivoire	COT_GRO_C71	adult	PRJNA560089	-	Illumina Illumina TruSeq DNA HT	MiSeq	not available	250	100	118940	131	0.0006	237707	2995	0.1673	202250	629.6	96.2	0	0	0	0
Cote d'Ivoire	COT_LOU_1112F	adult	PRJNA289926	-	KAPA LTP	HiSeq 2500	54000073	100	60	9763484	9109332	0.4665	9621578	7638	0.0351	9121773	355.96	97.58	8.41	1.25	54.44	93.75
Cote d'Ivoire	COT_OUA_3486a	adult	PRJNA289926	-	Lucigen ER, NEB reagents	HiSeq 2500	40021656	100	60	16790097	19587356	0.5833	11605760	17937	0.0444	10869269	208.09	95.23	10.35	3.97	32.26	84.96
Ghana	GHA_30_412_05	adult	PRJNA560089	-	Illumina Illumina TruSeq DNA HT	MiSeq	not available	250	100	204229	19106	0.0468	389242	2186	0.1771	319250	1453.27	96.41	0.01	0	0	0
Ghana	GHA_30_412_07	adult	PRJNA560089	-	Illumina Illumina TruSeq DNA HT	MiSeq	not available	250	100	210321	11717	0.0279	408770	2356	0.1859	331553	1646.97	96.48	0.01	0	0	0
Ghana	GHA_AB1_02_02	adult	PRJNA997216	REPLIG	Illumina DNAFlex	NextSeq 550	11929074	150	125	7750378	4877592	0.3147	10431170	2199320	0.2467	7740337	394.5	98.57	11.53	7.53	2.12	2.36
Ghana	GHA_AB1_02_02	adult	PRJNA560089	-	Illumina TruSeq	MiSeq	not available	250	29	2754	30	0.0054	5478	398	0.1606	5410	65.11	93.89	0	0	0	0
Ghana	GHA_AB1_02_03	adult	PRJNA560089	-	Illumina TruSeq	MiSeq	not available	250	29	5215	18	0.0017	10408	616	0.2012	10296	128.59	96.5	0	0	0	0
Ghana	GHA_AB1_02_04	adult	PRJNA560089	-	Illumina TruSeq	MiSeq	not available	250	29	1832	2	0.0005	3659	428	0.1618	3610	42.76	74.79	0	0	0	0
Ghana	GHA_AB1_02_05	adult	PRJNA560089	-	NEBNext	HiSeq 2500	18573474	100	75	15120050	2514794	0.0832	27535334	194388	0.0379	26014927	3415.54	99.51	31.31	79.47	0.36	2.36
Ghana	GHA_AB1_02_06	adult	PRJNA560089	-	NEBNext	HiSeq 2500	13128967	100	75	9629562	11950856	0.6205	6950657	35359	0.0928	6175967	5605	99.48	6.16	0.36	49	99.07
Ghana	GHA_AB1_03_08	adult	PRJNA560089	-	Illumina TruSeq	MiSeq	not available	250	29	3032	16	0.0026	6048	534	0.1713	5940	70.9	76.35	0	0	0	0
Ghana	GHA_AB1_25_11	adult	PRJNA560089	-	Illumina TruSeq	MiSeq	not available	250	29	1627	137	0.0421	3115	210	0.0745	3078	37.49	75.18	0	0	0	0
Ghana	GHA_AB1_26_15	adult	PRJNA560089	-	Illumina TruSeq	MiSeq	not available	250	29	1643	85	0.0259	3165	64	0.0581	3100	38.84	59.12	0	0	0	0.23
Ghana	GHA_AB1_26_17	adult	PRJNA560089	-	NEBNext	HiSeq 2500	13368812	100	75	10646359	14197747	0.6668	5280708	44843	0.0534	4904253	6201	99.19	3.94	0.08	114.82	99.5
Ghana	GHA_AB1_46_18	adult	PRJNA560089	-	Illumina TruSeq	MiSeq	not available	250	29	3050	16	0.0026	6082	554	0.1845	6039	73.29	77.1	0	0	0	0
Ghana	GHA_AB1_46_18	adult	PRJNA973712	-	NEBNext	HiSeq 2500	10081170	100	75	8262529	13432064	0.8128	2527199	13946	0.0376	2383494	2856	99	1.94	0.03	55.16	98.33
Ghana	GHA_AB1_46_19	adult	PRJNA997216	REPLIG	Illumina DNAFlex	NextSeq 550	13938710	150	125	7424003	13716115	0.9238	237145	78248	0.2467	139037	15.25	21.49	0.17	0.06	0.32	0.2
Ghana	GHA_AB1_46_20	adult	PRJNA560089	-	Illumina TruSeq	MiSeq	not available	250	29	3093	58	0.0094	6124	383	0.1622	6033	72.88	96.65	0	0	0	0
Ghana	GHA_AB1_46_20	adult	PRJNA973712	-	NEBNext	HiSeq 2500	55164530	100	75	48560292	1198967	0.0123	95609329	396064	0.0369	90357188	6231.7	99.88	91.62	94.88	5.96	0.62
Ghana	GHA_AB1_59_21	adult	PRJNA997216	REPLIG	Illumina DNAFlex	NextSeq 550	12526137	150	125	5936672	3477154	0.2929	6338267	3734033	0.6619	2095307	288.94	98.28	2.92	0.29	1.26	0.22
Ghana	GHA_AB1_59_21	adult	PRJNA560089	-	Illumina TruSeq	MiSeq	not available	250	29	5347	28	0.0026	10666	654	0.1892	10464	125.09	97.44	0	0	0	0
Ghana	GHA_AB2_04_01	adult	PRJNA560089	-	Illumina TruSeq	MiSeq	not available	250	29	5186	37	0.0036	10329	502	0.2343	10196	126.96	97.65	0	0	0	0
Ghana	GHA_AB2_07_04	adult	PRJNA560089	-	Illumina TruSeq	MiSeq	not available	250	29	2528	12	0.0024	5044	562	0.2661	4952	59.88	91.34	0	0	0	0
Ghana	GHA_AB2_07_08	adult	PRJNA997216	REPLIG	Illumina DNAFlex	NextSeq 550	15078997	150	125	10236796	7114444	0.3475	2001935	328356	0.2359	1490919	79.16	96.41	2.14	0.2	2.21	1.18
Ghana	GHA_AB2_07_34	adult	PRJNA560089	-	Illumina TruSeq	MiSeq	not available	250	29	3916	13	0.0017	7818	435	0.2356	7722	94.83	97.25	0	0	0	0
Ghana	GHA_AB2_09_10	adult	PRJNA560089	-	Illumina TruSeq	MiSeq	not available	250	29	5611	40	0.0036	11179	560	0.1848	11017	136.7	98.2	0	0	0	0
Ghana	GHA_AB2_09_11	adult	PRJNA560089	-	Illumina TruSeq	MiSeq	not available	250	29	1548	4	0.0013	3092	441	0.2477	3063	36.9	46.2	0	0	0	0
Ghana	GHA_AB2_24_12	adult	PRJNA973712	-	NEBNext	HiSeq 2500	14786136	100	75	12636582	12305726	0.4869	12297230	100531	0.0269	11748607	2504	98.76	12.36	16.96	151.84	99.52
Ghana	GHA_AB2_24_16	adult	PRJNA973712	-	NEBNext	HiSeq 2500	12045684	100	75	10192166	14246611	0.6989	2580876	30207	0.0217	5003134	2674	98.65	4.71	0.17	101.41	98.95
Ghana	GHA_AB2_24_16	adult	PRJNA560089	-	Illumina TruSeq	MiSeq	not available	250	29	4056	33	0.0041	8066	552	0.1773	7973	99.68	94.91	0	0	0	0
Ghana	GHA_AB2_24_17	adult	PRJNA560089	-	Illumina TruSeq	MiSeq	not available	250	29	3463	12	0.0017	6871	527	0.1349	6790	83.62	94.83	0	0	0	0
Ghana	GHA_AB2_24_20	adult	PRJNA973712	-	NEBNext	HiSeq 2500	15636741	100	75	11563956	13881787	0.6002	4315553	102930	0.0291	8402686	4077	98.82	8.33	2.65	116.38	99.39
Ghana	GHA_AB2_24_20	adult	PRJNA560089	-	Illumina TruSeq	MiSeq	not available	250	29	6928	78	0.0056	13774	1134	0.2001	13649	167.58	96.92	0	0	0	0
Ghana	GHA_AB2_24_21	adult	PRJNA560089	-	Illumina TruSeq	MiSeq	not available	250	29	4516	662	0.0733	8296	807	0.2975	8241	101.67	94.93	0	0	0	0
Ghana	GHA_AB2_24_21	adult	PRJNA973712	-	NEBNext	HiSeq 2500	14234287	100	75	10490985	12704266	0.6055	7778384	43969	0.041	7319987	5679	99.16	6.34	0.36	181.24	99.58
Ghana	GHA_AB2_24_23	adult	PRJNA973712	-	NEBNext	HiSeq 2500	25113605	100	75	19859581	18305139	0.4609	20815085	140097	0.0363	19646141	5198	98.83	21.24	54.9	193.62	99.51
Ghana	GHA_AB2_24_24	adult	PRJNA997216	REPLIG	Illumina DNAFlex	NextSeq 550	10884159	150	125	7385127	1807027	0.1223	3310484	2030038	0.9498	158651	22.29	60.97	0.14	0.05	4.76	0.33
Ghana	GHA_AB2_24_26	adult	PRJNA997216	REPLIG	Illumina DNAFlex	NextSeq 550	12769921	150	125	9347529	1530368	0.0819	13747410	3618517	0.61	5185902	96.83	97.08	7.33	4.44	4.22	2.86
Ghana	GHA_AB2_24_28	adult	PRJNA973712	-	NEBNext	HiSeq 2500	16499054	100	75	10410414	15053621	0.723	5002892	53279	0.031	4748938	1521	98.89	4.41	0.13	102.84	99.06
Ghana	GHA_AB2_24_29	adult	PRJNA973712	-	NEBNext	HiSeq 2500	15800805	100	75	9996695	7889420	0.3946	11696243	131635	0.032	11079918	3696	99.13	12.25	14.98	52.3	97.15
Ghana	GHA_AB2_24_31	adult	PRJNA997216	REPLIG	Illumina DNAFlex	NextSeq 550	13444927	150	125	8015313	7182968	0.4481	3669176	1743082	0.66	1176730	46.21	93.47	1.44	0.38	4.69	1.47
Ghana	GHA_AB2_29_33	adult	PRJNA560089	-	Illumina TruSeq	MiSeq	not available	250	29	4577	50	0.0055	9103	996	0.2426	9043	110.47	94	0	0	0	0
Ghana	GHA_ASH_14_64_3	adult	PRJNA289926	-	KAPA LTP	HiSeq 2000	44134614	100	60	31723595	15708499	0.2476	40894985	40124	0.0733	37181012	582.88	98.59	36.89	82.68	23.16	70.86
Ghana	GHA_ASH_15_116_1	adult	PRJNA289926	-	KAPA LTP	HiSeq 2000	38580780	100	60	19804473	13172395	0.3326	22400722	20974	0.0596	20686827	587.94	97.98	20.04	56.95	55.34	93.92
Ghana	GHA_ASH_16_71_3_2	adult	PRJNA289926	-	KAPA LTP	HiSeq 2000	6591586	100	60	9089326	11197866	0.616	4994902	234513	0.0919	4365230	680.82	98.8	3.57	0.19	2.58	0.03
Ghana	GHA_ASH_K5	adult	PRJNA289926	-	KAPA LTP	HiSeq 2000	23169789	100	60	20799834	36589014	0.8796	4136031	3044	0.0369	3904480	94.76	89.37	3.74	0.06	2.42	0.01
Ghana	GHA_ASU_02_01	adult	PRJNA560089	-	Illumina Illumina TruSeq DNA HT	MiSeq	not available	250	100	211638	427	0.001	422794	5100	0.1167	343791	841.28	96.4	0	0	0	0
Ghana	GHA_ASU_06_08	adult	PRJNA973712	-	NEBNext	HiSeq 2500	50835887	100	75	45229809	31200	0.0003	90178868	193379	0.0453	84680656	5639.45	99.75	86.49	94.92	6.38	0.63
Ghana	GHA_ASU_07_10	adult	PRJNA973712	-	NEBNext	HiSeq 2500	22213129	100	75	12421241	2499314	0.1006	21926304	330209	0.0763	19843616	12359	98.97	18.92	45.31	343.61	99.64
Ghana	GHA_ASU_07_15	adult	PRJNA973712	-	NEBNext	HiSeq 2500	24231746	100	75	10756690	1180	0.0001	18864405	53422	0.0293	17977674	1191	98.61	21.53	55.43	40.91	96
Ghana	GHA_ASU_07_17	adult	PRJNA973712	-	NEBNext	HiSeq 2500	16692149	100	75	10361803	13543009	0.6535	6973689	18581	0.0298	6637775	2436	98.69	7.46	1.29	38.54	93.87
Ghana	GHA_ASU_07_18	adult	PRJNA973712	-	NEBNext	HiSeq 2500	4260944	100	75	1562824	2001156	0.6402	1037800	2492	0.0276	988961	1158	96.61	0.88	0.01	17.04	34.27
Ghana	GHA_ASU_1000_04	adult	PRJNA973712	-	NEBNext	HiSeq 2500	57071481	100	75	50214977	6965856	0.0694	93205610	194788	0.0338	88257303	2105.26	99.79	94.36	94.92	12.6	3.18
Ghana	GHA_ASU_11_02	adult	PRJNA560089	-	Illumina TruSeq	MiSeq	not available	250	29	209926	3257	0.0078	416539	7721	0.1677	161997	2584.89	96.59	0	0	0	0
Ghana	GHA_ASU_1410S	adult	PRJNA289926	-	KAPA LTP	HiSeq	21901811	100	60	17628652	32013782	0.908	2370859	3542	0.1572	1951942	513.23	98.66	0.5	55.43	106.53	97.47
Ghana	GHA_ASU_19_01	adult	PRJNA560089	-	Illumina Illumina TruSeq DNA HT	MiSeq	not available	250	100	199728	6691	0.0168	392648	6231	0.1907	317394	307	96.14	0	0	0	0
Ghana	GHA_ASU_21_01	adult	PRJNA560089	-	Illumina TruSeq	MiSeq	not available	250	29	166429	2277	0.0068	330421	9879	0.1795	141704	2234.41	96.44	0	0	0	0
Ghana	GHA_ASU_21_02	adult	PRJNA560089	-	Illumina Illumina TruSeq DNA HT	MiSeq	not available	250	100	97271	7445	0.0383	186989	7255	0.1714	163959	1144.16	96.37	0	0	0	0
Ghana	GHA_ASU_21_03	adult	PRJNA560089	-	Illumina Illumina TruSeq DNA HT	MiSeq	not available	250	100	162244	512	0.0016	323927	3678	0.1852	267792	828.4	96.3	0	0	0	0
Ghana	GHA_ASU_22_07	adult	PRJNA973712	-	NEBNext	HiSeq 2500	9878855	100	75	8253714	748537	0.0453	15492452	48702	0.0156	14948619	1043	98.29	17.97	42.17	26.97	77.86
Ghana	GHA_ASU_23	adult	PRJNA560089	-	Illumina TruSeq	MiSeq	not available	250	29	140467	165	0.0006	280754	5209	0.1557	57342	914.73	96.43	0	0	0	0
Ghana	GHA_ASU_25_01	adult	PRJNA560089	-	Illumina Illumina TruSeq DNA HT	MiSeq	not available	250	100	238709	1102	0.0023	476229	6314	0.1859	386839	1323.51	96.38	0	0	0	0
Ghana	GHA_ASU_25_02	adult	PRJNA560089	-	Illumina Illumina TruSeq DNA HT	MiSeq	not available	250	100	213761	745	0.0017	426671	11249	0.1796	348907	2203.89	96.38	0	0	0	0
Ghana	GHA_ASU_25_03	adult	PRJNA560089	-	Illumina Illumina TruSeq DNA HT	MiSeq	not available	250	100	142224	59147	0.2079	223804	7403	0.1221	195372	1236.05	97.29	0	0	0	0
Ghana	GHA_BAY_54_05	adult	PRJNA973712	-	NEBNext	HiSeq 2500	53773229	100	75	48067065	48248	0.0005	95871876	459902	0.0496	89476377	3097.14	99.89	91.22	94.79	0.56	0.62
Ghana	GHA_BIE_1526a	adult	PRJNA289926	-	Lucigen ER, NEB reagents	HiSeq 2000	65218237	100	60	41683174	17452090	0.2093	55343663	80772	0.0894	49477656	924.52	98.24	48.3	86.02	79.57	96.28
Ghana	GHA_BIE_2699a	adult	PRJNA289926	-	Lucigen ER, NEB reagents	HiSeq 2000	103448598	100	60	33167791	51352472	0.7741	12230312	30118	0.076	11036660	587.95	97.77	10.17	4.2	33.68	85.77
Ghana	GHA_BUI_01	adult	PRJNA560089	-	Illumina Illumina TruSeq DNA HT	MiSeq	not available	250	100	157055	881	0.0028	313164	8185	0.1619	261454	1318.73	96.44	0	0	0	0
Ghana	GHA_BUI_02_01	adult	PRJNA560089	-	Illumina Illumina TruSeq DNA HT	MiSeq	not available	250	100	166090	1216	0.0037	330913	4037	0.1439	282362	1585.05	96.41	0	0	0	0
Ghana	GHA_BUI_02_02	adult	PRJNA560089	-	Illumina Illumina TruSeq DNA HT	MiSeq	not available	250	100	186553	330	0.0009	372717	4883	0.1661	309896	1559.34	96.51	0	0	0	0
Ghana	GHA_BUI_02_03	adult	PRJNA560089	-	Illumina Illumina TruSeq DNA HT	MiSeq	not available	250	100	212591	876	0.0021	424057	4521	0.1851	344616	849.27	96.47	0	0	0	0
Ghana	GHA_BUI_06_01	adult	PRJNA560089	-	Illumina Illumina TruSeq DNA HT	MiSeq	not available	250	100	222492	2175	0.0049	442713	6254	0.1863	359547	634.9	96.33	0	0	0	0
Ghana	GHA_BUI_06_03	adult	PRJNA560089	-	Illumina Illumina TruSeq DNA HT	MiSeq	not available	250	100	153793	139	0.0005	307414	5063	0.1658	255783	651.5	96.26	0	0	0	0
Ghana	GHA_CHA_11_02	adult	PRJNA560089	-	Illumina TruSeq	MiSeq	not available	250	29	6718	6	0.0004	13429	792	0.2005	13243	163.71	98.44	0	0	0	0
Ghana	GHA_CHA_11_02	adult	PRJNA997216	REPLIG	Illumina DNAFlex	NextSeq 550	10346877	150	125	5587760	1192041	0.1067	9406580	4164475	0.3559	5912171	1552.88	99.19	8.35	4.3	0.06	0.01
Ghana	GHA_CHA_11_03	adult	PRJNA973712	-	NEBNext	HiSeq 2500	2660717	100	75	2242717	480324	0.1071	3962601	73242	0.0117	3835473	750	98.54	4.51	0.16	2.59	0.1
Ghana	GHA_CHA_13_05	adult	PRJNA973712	-	NEBNext	HiSeq 2500	9944416	100	75	5601737	7539228	0.6729	3545451	19533	0.0197	3424745	1660	99.05	2.06	0.04	186.86	99.55
Ghana	GHA_CHA_13_07	adult	PRJNA560089	-	Illumina TruSeq	MiSeq	not available	250	29	7798	36	0.0023	15558	756	0.1297	15244	184.81	98.68	0	0	0	0
Ghana	GHA_CHA_14_10	adult	PRJNA997216	REPLIG	Illumina DNAFlex	NextSeq 550	13202939	150	125	9913897	12739063	0.6425	5754079	1543044	0.516	2712927	389.59	98.57	3.9	0.4	1.96	0.86
Ghana	GHA_CHA_14_10	adult	PRJNA560089	-	Illumina TruSeq	MiSeq	not available	250	29	3179	41	0.0064	6316	218	0.0877	6263	77.4	84.84	0	0	0	0
Ghana	GHA_CHA_14_12	adult	PRJNA560089	-	Illumina TruSeq	MiSeq	not available	250	29	5604	90	0.008	11107	645	0.0862	10889	132.37	97.25	0	0	0	0
Ghana	GHA_CHA_23_14	adult	PRJNA560089	-	Illumina TruSeq	MiSeq	not available	250	29	4725	18	0.0019	9431	350	0.0854	9322	115.09	96.83	0	0	0	0
Ghana	GHA_CHA_25_18	adult	PRJNA560089	-	Illumina TruSeq	MiSeq	not available	250	29	7973	97	0.0061	15665	248	0.1396	15453	201.81	98.97	0	0	0	0
Ghana	GHA_CHA_25_20	adult	PRJNA997216	REPLIG	Illumina DNAFlex	NextSeq 550	11948942	150	125	9745753	4793758	0.2459	129776	3237	0.6867	27950	20.5	32.12	0.02	0	0.57	0.41
Ghana	GHA_CHA_34_25	adult	PRJNA997216	REPLIG	Illumina DNAFlex	NextSeq 550	11587139	150	125	9259369	4045816	0.2185	382676	87646	0.3309	240070	35.17	89.13	0.32	0.05	0.77	0.27
Ghana	GHA_CHA_34_25	adult	PRJNA560089	-	Illumina TruSeq	MiSeq	not available	250	29	10501	20	0.001	20960	809	0.2236	20671	263.59	99.11	0	0	0	0
Ghana	GHA_CHA_34_26	adult	PRJNA997216	REPLIG	Illumina DNAFlex	NextSeq 550	10581809	150	125	8596655	4400238	0.2559	98054	1125	0.6843	21491	29.92	88.47	0.02	0	0.21	0.2
Ghana	GHA_CHA_34_48	adult	PRJNA997216	REPLIG	Illumina DNAFlex	NextSeq 550	13129022	150	125	10979382	3911903	0.1781	125455	6354	0.5177	48988	71.73	97.05	0.04	0	1.24	0.29
Ghana	GHA_CHA_34_49	adult	PRJNA973712	-	NEBNext	HiSeq 2500	5810162	100	75	4238390	258015	0.0304	280323	1195	0.0461	260581	204	93.87	0.19	0	6.83	0.24
Ghana	GHA_CHA_34_49	adult	PRJNA560089	-	Illumina TruSeq	MiSeq	not available	250	29	4801	28	0.0029	9504	1203	0.3211	9422	116.54	95.66	0	0	0	0
Ghana	GHA_CHA_35_27	adult	PRJNA560089	-	Illumina TruSeq	MiSeq	not available	250	29	9296	51	0.0027	18521	1632	0.2919	18280	221.7	98.66	0	0	0	0
Ghana	GHA_CHA_36_14	adult	PRJNA997216	REPLIG	Illumina DNAFlex	NextSeq 550	13721892	150	125	8644974	4447905	0.2573	9719410	3189958	0.6241	3566899	136.55	97.02	4.99	0.95	0.31	0.3
Ghana	GHA_CHA_54_31	adult	PRJNA560089	-	Illumina TruSeq	MiSeq	not available	250	29	10146	62	0.0031	20226	326	0.242	20008	252.12	98.43	0	0	0	0
Ghana	GHA_CHA_54_31	adult	PRJNA973712	-	NEBNext	HiSeq 2500	50902230	100	75	45304912	77775	0.0009	90172403	279663	0.0404	85085971	4883.04	99.93	85.72	94.99	81.92	99.69
Ghana	GHA_CHA_67_33	adult	PRJNA560089	-	Illumina TruSeq	MiSeq	not available	250	29	6747	77	0.0057	13416	762	0.208	13308	171.2	91.74	0	0	0	0
Ghana	GHA_CHA_68_38	adult	PRJNA560089	-	Illumina TruSeq	MiSeq	not available	250	29	7636	28	0.0018	15229	1079	0.2094	15068	188.1	98.11	0	0	0	0
Ghana	GHA_CHA_68_39	adult	PRJNA997216	REPLIG	Illumina DNAFlex	NextSeq 550	13946193	150	125	10789677	4486063	0.2079	15238004	10284961	0.8893	1651426	336.57	97.18	2.24	0.4	9.2	4.65
Ghana	GHA_JAG_01_11	adult	PRJNA560089	-	Illumina Illumina TruSeq DNA HT	MiSeq	not available	250	100	169444	1536	0.0045	337297	4149	0.1592	282680	1484.54	96.35	0	0	0	0
Ghana	GHA_JAG_02_01	adult	PRJNA560089	-	Illumina Illumina TruSeq DNA HT	MiSeq	not available	250	100	260982	2324	0.0045	519534	8339	0.1858	421259	3178.93	96.56	0	0	0	0
Ghana	GHA_JAG_02_03	adult	PRJNA560089	-	Illumina Illumina TruSeq DNA HT	MiSeq	not available	250	100	260982	2324	0.0045	519534	8339	0.1858	421259	3178.93	96.56	0	0	0	0
Ghana	GHA_JAG_02_05	adult	PRJNA560089	-	Illumina Illumina TruSeq DNA HT	MiSeq	not available	250	100	149103	303	0.001	297822	4805	0.1575	249883	1701.22	96.37	0	0	0	0
Ghana	GHA_JAG_03_03	adult	PRJNA560089	-	Illumina Illumina TruSeq DNA HT	MiSeq	not available	250	100	111427	30765	0.1381	191923	5137	0.1406	163921	1822.94	96.43	0	0	0	0
Ghana	GHA_JAG_03_33	adult	PRJNA560089	-	Illumina TruSeq	MiSeq	not available	250	29	3923	37	0.0047	7804	546	0.134	7722	96.65	97.13	0	0	0	0
Ghana	GHA_JAG_04_01	adult	PRJNA560089	-	Illumina Illumina TruSeq DNA HT	MiSeq	not available	250	100	142622	100	0.0004	285100	3363	0.1656	237055	1120.99	96.32	0	0	0	0
Ghana	GHA_JAG_06_04	adult	PRJNA560089	-	Illumina Illumina TruSeq DNA HT	MiSeq	not available	250	100	166117	2211	0.0067	329952	6788	0.1594	276247	1761.02	96.48	0	0	0	0
Ghana	GHA_JAG_07_03	adult	PRJNA560089	-	Illumina Illumina TruSeq DNA HT	MiSeq	not available	250	100	148522	2503	0.0084	294474	6581	0.1587	246428	1573.6	96.43	0	0	0	0
Ghana	GHA_JAG_07_03	adult	PRJNA560089	-	Illumina TruSeq	MiSeq	not available	250	29	154732	2439	0.0079	306989	6702	0.1539	121887	1948	96.5	0	0	0	0
Ghana	GHA_JAG_08_23	adult	PRJNA560089	-	Illumina TruSeq	MiSeq	not available	250	29	5056	43	0.0043	10061	405	0.1742	9973	127.46	96.33	0	0	0	0
Ghana	GHA_JAG_11_01	adult	PRJNA997216	REPLIG	Illumina DNAFlex	NextSeq 550	12794337	150	125	10117544	2539104	0.1255	12058081	3922659	0.8166	2135225	341.02	98.57	2.99	0.73	4.95	4.09
Ghana	GHA_JAG_13_05	adult	PRJNA560089	-	Illumina Illumina TruSeq DNA HT	MiSeq	not available	250	100	171297	1353	0.0039	341108	6261	0.1523	287708	1081.21	98.01	0	0	0	0
Ghana	GHA_JAG_17_01	adult	PRJNA560089	-	Illumina Illumina TruSeq DNA HT	MiSeq	not available	250	100	124373	1180	0.0047	247418	11487	0.1345	211719	1900.78	98.09	0	0	0	0
Ghana	GHA_JAG_25_03	adult	PRJNA973712	-	NEBNext	HiSeq 2500	9597797	100	75	8362268	84441	0.005	16541791	38652	0.0193	15984626	1303	99.11	16.44	34.24	307.57	99.73
Ghana	GHA_JAG_33_35	adult	PRJNA560089	-	Illumina TruSeq	MiSeq	not available	250	29	4163	6	0.0007	8319	684	0.195	8206	101.24	97.82	0	0	0	0
Ghana	GHA_JAG_33_35	adult	PRJNA973712	-	NEBNext	HiSeq 2500	17041954	100	75	13496323	3214274	0.1191	23331958	75685	0.1202	20268211	3618	99.87	14.72	19.56	975.82	99.77
Ghana	GHA_JAG_37_05	adult	PRJNA973712	-	NEBNext	HiSeq 2500	62869504	100	75	54724700	68043562	0.6217	40612515	57980	0.029	38824086	2919.2	99.84	36.71	92.28	248.09	99.79
Ghana	GHA_JAG_37_06	adult	PRJNA973712	-	NEBNext	HiSeq 2500	4310180	100	75	3749261	400132	0.0534	7069657	20280	0.0111	6862685	405	97.7	8.09	1.24	28.19	85.99
Ghana	GHA_JAG_45_07	adult	PRJNA973712	-	NEBNext	HiSeq 2500	17075533	100	75	14241969	24713456	0.8676	3381615	10006	0.0275	3216270	1019	98.52	3.48	0.09	19.68	49.78
Ghana	GHA_JAG_45_08	adult	PRJNA997216	REPLIG	Illumina DNAFlex	NextSeq 550	10899294	150	125	8674026	1249815	0.072	13208555	606251	0.0685	12113947	1192.23	99.19	18.3	38.96	0.66	0.36
Ghana	GHA_JAG_53_36	adult	PRJNA560089	-	Illumina TruSeq	MiSeq	not available	250	29	3259	14	0.0021	6480	504	0.181	6364	77.33	96.54	0	0	0	0
Ghana	GHA_JAG_54_10	adult	PRJNA973712	-	NEBNext	HiSeq 2500	43734533	100	75	38825040	354629	0.0046	76757209	208695	0.0308	73150289	4672.46	99.03	74.67	94.99	6.2	0.68
Ghana	GHA_JAG_54_10	adult	PRJNA560089	-	Illumina TruSeq	MiSeq	not available	250	29	8224	30	0.0018	16417	529	0.2105	16287	205.39	97.4	0	0	0	0
Ghana	GHA_JAG_61_11	adult	PRJNA560089	-	Illumina TruSeq	MiSeq	not available	250	29	5872	10	0.0009	11733	653	0.1087	11408	136.53	97.22	0	0	0	0
Ghana	GHA_JAG_61_11	adult	PRJNA973712	-	NEBNext	HiSeq 2500	48274829	100	75	43162784	344241	0.004	85815383	213489	0.0428	80809587	4278.91	99.94	82.83	94.9	17.23	0.36
Ghana	GHA_JAG_62_13	adult	PRJNA560089	-	Illumina TruSeq	MiSeq	not available	250	29	14977	28	0.0009	29925	683	0.176	29470	379.91	99.25	0	0	0	0
Ghana	GHA_JAG_62_14	adult	PRJNA997216	REPLIG	Illumina DNAFlex	NextSeq 550	11058242	150	125	5876124	2171268	0.1848	6573613	1510127	0.4196	3741803	587.19	98.86	5.31	2.02	17.73	12.93
Ghana	GHA_JAG_65_15	adult	PRJNA560089	-	Illumina TruSeq	MiSeq	not available	250	29	8444	16	0.0009	16868	774	0.2293	16613	214.59	98.78	0	0	0	0
Ghana	GHA_JAG_79_19	adult	PRJNA973712	-	NEBNext	HiSeq 2500	64242871	100	75	56176142	236495	0.0021	110735737	748027	0.0465	103426387	3514.28	99.9	104.33	94.92	75.41	99.62
Ghana	GHA_JAG_79_40	adult	PRJNA560089	-	Illumina TruSeq	MiSeq	not available	250	29	4121	48	0.0058	8176	1023	0.1974	8024	94.26	96.82	0	0	0	0
Ghana	GHA_JAG_81_24	adult	PRJNA973712	-	NEBNext	HiSeq 2500	54998058	100	75	12822612	3704626	0.1445	20522308	72132	0.0417	19336237	4714	99.32	22.15	64.18	99.56	99.63
Ghana	GHA_JAG_81_24	adult	PRJNA560089	-	Illumina TruSeq	MiSeq	not available	250	29	10066	13	0.0006	20111	565	0.2274	19830	254.98	99.05	0	0	0	0
Ghana	GHA_JAG_83_25	adult	PRJNA997216	REPLIG	Illumina DNAFlex	NextSeq 550	14277561	150	125	10002345	7069724	0.3534	3996774	1161319	0.4899	1936827	113.36	97.66	2.74	0.73	2.08	1.21
Ghana	GHA_JAG_83_25	adult	PRJNA560089	-	Illumina TruSeq	MiSeq	not available	250	29	8633	64	0.0037	17192	640	0.1181	16979	211.77	97.62	0	0	0	0
Ghana	GHA_JAG_83_26	adult	PRJNA973712	-	NEBNext	HiSeq 2500	14056036	100	75	12404008	834068	0.0336	23771401	94730	0.0341	22514522	2561	98.76	26.6	74.59	87.46	99.42
Ghana	GHA_JAG_83_26	adult	PRJNA560089	-	Illumina TruSeq	MiSeq	not available	250	29	10729	158	0.0074	21294	555	0.1486	21033	275.16	98.74	0	0	0	0
Ghana	GHA_JAG_94_28	adult	PRJNA973712	-	NEBNext	HiSeq 2500	17602031	100	75	15838483	27604529	0.8714	3031256	6711	0.0319	2869826	1722	98.57	2.99	0.07	17.05	28.81
Ghana	GHA_JAG_94_30	adult	PRJNA997216	REPLIG	Illumina DNAFlex	NextSeq 550	11456513	150	125	7040187	313631	0.0223	13455180	3608383	0.5785	5524084	210.14	98.49	7.93	2.93	14.79	6.34
Ghana	GHA_JAG_94_31	adult	PRJNA973712	-	NEBNext	HiSeq 2500	64811683	100	75	57333404	4263224	0.0372	109741783	290588	0.0395	103615864	2557.7	99.7	105.69	95.1	16.06	17.97
Ghana	GHA_JAG_94_41	adult	PRJNA997216	REPLIG	Illumina DNAFlex	NextSeq 550	13440091	150	125	9375697	2991203	0.1595	9364038	2276424	0.7491	2249066	169.85	97.93	3.07	0.8	14.9	12.78
Ghana	GHA_KOJ_06_21	adult	PRJNA560089	-	Illumina TruSeq	MiSeq	not available	250	29	4332	85	0.0098	8648	376	0.1591	8529	105.09	97.81	0	0	0	0
Ghana	GHA_KOJ_17_19	adult	PRJNA560089	-	Illumina TruSeq	MiSeq	not available	250	29	3381	56	0.0083	6668	456	0.1557	6587	81.52	95.5	0	0	0	0
Ghana	GHA_KOJ_190_05	adult	PRJNA560089	-	Illumina TruSeq	MiSeq	not available	250	29	11109	18	0.0008	22203	846	0.2842	21988	282.17	99.09	0	0	0	0
Ghana	GHA_KOJ_190_06	adult	PRJNA560089	-	Illumina TruSeq	MiSeq	not available	250	29	9129	2	0.0001	18241	910	0.1414	17786	221.29	98.79	0	0	0	0
Ghana	GHA_KOJ_190_20	adult	PRJNA560089	-	Illumina TruSeq	MiSeq	not available	250	29	7206	30	0.0021	14403	986	0.2171	14233	179.08	98.7	0	0	0	0
Ghana	GHA_KOJ_190_20	adult	PRJNA973712	-	NEBNext	HiSeq 2500	10118646	100	75	8938892	5157151	0.2885	3071020	9213	0.061	2831456	5385	99.41	1.66	0.03	99.73	95.56
Ghana	GHA_KOJ_22_07	adult	PRJNA560089	-	Illumina TruSeq	MiSeq	not available	250	29	8983	137	0.0076	17861	357	0.3582	17786	230.68	96.65	0	0	0	0
Ghana	GHA_KOJ_22_11	adult	PRJNA973712	-	NEBNext	HiSeq 2500	13224725	100	75	12072296	5116297	0.2119	10473452	36047	0.0625	9636566	3617	99.24	10.48	3.85	85.28	99.52
Ghana	GHA_KOJ_28_12	adult	PRJNA973712	-	NEBNext	HiSeq 2500	11950872	100	75	10445934	593316	0.0284	19488441	61323	0.0344	18525501	4676	99.27	19.31	50.59	286.72	99.73
Ghana	GHA_KOJ_28_13	adult	PRJNA973712	-	NEBNext	HiSeq 2500	13221989	100	75	11085351	5404414	0.2438	15504308	58891	0.0386	14621997	2782	98.94	17.17	38.45	35.83	96.72
Ghana	GHA_KOJ_72_14	adult	PRJNA560089	-	Illumina TruSeq	MiSeq	not available	250	29	2976	20	0.0034	5943	778	0.3167	5875	72.27	90.11	0	0	0	0
Ghana	GHA_KOJ_75_16	adult	PRJNA973712	-	NEBNext	HiSeq 2500	10241917	100	75	9082143	5563244	0.3063	9217832	30064	0.0272	8819452	1105	98.67	10.01	3.36	64.67	99.32
Ghana	GHA_KOJ_75_16	adult	PRJNA560089	-	Illumina TruSeq	MiSeq	not available	250	29	9542	16	0.0008	18882	771	0.0929	18508	226.63	98.18	0	0	0	0
Ghana	GHA_KOJ_77_23	adult	PRJNA997216	REPLIG	Illumina DNAFlex	NextSeq 550	2271075	150	125	1826331	1713026	0.469	68871	20123	0.5968	62149	252.92	97.85	0.01	0.01	3	1.41
Ghana	GHA_KOJ_77_23	adult	PRJNA560089	-	Illumina TruSeq	MiSeq	not available	250	29	8272	58	0.0035	16516	814	0.1425	16151	195.33	98.65	0	38.45	0	96.72
Ghana	GHA_KYG_04_01	adult	PRJNA560089	-	Illumina TruSeq	MiSeq	not available	250	29	11081	0	0		564	0.1823	21898	275.69	98.65	0	0	0	0
Ghana	GHA_KYG_04_01	adult	PRJNA973712	-	NEBNext	HiSeq 2500	54673361	100	75	48183226	788079	0.0082	95213061	456326	0.0653	87325776	2800.57	99.69	88.11	94.42	61.11	99.62
Ghana	GHA_KYG_04_02	adult	PRJNA560089	-	Illumina TruSeq	MiSeq	not available	250	29	6397	0	0		895	0.5934	12678	154.82	96.57	0	0	0	0
Ghana	GHA_KYG_04_02	adult	PRJNA973712	-	NEBNext	HiSeq 2500	46409596	100	75	40603307	789824	0.0097	80217329	356872	0.0298	76469750	3610.97	99.76	78.08	94.63	4.53	0.36
Ghana	GHA_KYG_04_03	adult	PRJNA560089	-	Illumina TruSeq	MiSeq	not available	250	29	11072	0	0		1070	0.2289	21830	278.72	98.94	0	0	0	0
Ghana	GHA_KYG_04_04	adult	PRJNA560089	-	Illumina TruSeq	MiSeq	not available	250	29	12780	50	0.002		1119	0.2151	25112	316.75	99.08	0	0	0	0
Ghana	GHA_KYG_04_05	adult	PRJNA997216	REPLIG	Illumina DNAFlex	NextSeq 550	3994637	150	125	7396557	13244088	0.8953	256276	38153	0.2129	192852	352.43	97.99	1.29	0.24	7.54	0.79
Ghana	GHA_KYG_04_05	adult	PRJNA560089	-	Illumina TruSeq	MiSeq	not available	250	29	12948	37	0.0014		720	0.1209	25595	310.19	98.11	0	0	0	0
Ghana	GHA_KYG_06_18	adult	PRJNA973712	-	NEBNext	HiSeq 2500	61154053	100	75	54260858	760124	0.007	107098524	416795	0.0394	60945061	8162.26	100	102.12	95.07	6.8	0.76
Ghana	GHA_KYG_06_19	adult	PRJNA997216	REPLIG	Illumina DNAFlex	NextSeq 550	4551944	150	125	3086836	1785064	0.2891	1388418	654093	0.4939	680955	203.77	98.4	0.85	0.17	1.86	1.03
Ghana	GHA_KYG_29_10	adult	PRJNA560089	-	Illumina TruSeq	MiSeq	not available	250	29	9144	28	0.0015	18268	879	0.1837	17903	221.25	98.76	0	0	0	0
Ghana	GHA_KYG_29_11	adult	PRJNA560089	-	Illumina TruSeq	MiSeq	not available	250	29	9991	0	0	19943	818	0.3244	19800	251.57	98.43	0	0	0	0
Ghana	GHA_KYG_29_11	adult	PRJNA973712	-	NEBNext	HiSeq 2500	60382441	100	75	53040826	24211418	0.2282	81453689	306976	0.0461	76466179	8867.42	99.93	77.75	94.68	5.29	0.45
Ghana	GHA_KYG_29_12	adult	PRJNA560089	-	Illumina TruSeq	MiSeq	not available	250	29	4854	0	0	9652	526	0.1805	9576	122.92	95.75	0	0	0	0
Ghana	GHA_KYG_29_13	adult	PRJNA560089	-	Illumina TruSeq	MiSeq	not available	250	29	11804	0	0		1404	0.2753	23391	298.86	98.78	0	0	0	0
Ghana	GHA_KYG_44_15	adult	PRJNA973712	-	NEBNext	HiSeq 2500	13335499	100	75	11872381	10715213	0.4513	12776497	63795	0.0332	12131515	2112	99.17	13.17	15.93	133.35	99.62
Ghana	GHA_KYG_44_15	adult	PRJNA560089	-	Illumina TruSeq	MiSeq	not available	250	29	12550	0	0		1277	0.1607	24673	317.15	99.05	0	0	0	0
Ghana	GHA_KYG_44_17	adult	PRJNA997216	REPLIG	Illumina DNAFlex	NextSeq 550	11379595	150	125	2369666	2875025	0.6066	1776793	499418	0.4091	1025668	549.72	98.6	0.16	0.03	1.66	0.91
Ghana	GHA_KYG_70_20	adult	PRJNA560089	-	Illumina TruSeq	MiSeq	not available	250	29	9662	12	0.0006		806	0.2302	19023	243.13	98.56	0	0	0	0
Ghana	GHA_KYG_70_21	adult	PRJNA973712	-	NEBNext	HiSeq 2500	12044700	100	75	10811425	12905554	0.5968	8563004	32531	0.0255	8179718	2485	98.71	9.01	3.05	56.78	98.81
Ghana	GHA_KYG_70_21	adult	PRJNA560089	-	Illumina TruSeq	MiSeq	not available	250	29	11487	40	0.0017		487	0.0851	22370	277.48	98.68	0	0	0	0
Ghana	GHA_KYG_70_22	adult	PRJNA973712	-	NEBNext	HiSeq 2500	47845555	100	75	42081682	2461759	0.0292	81413146	144430	0.0411	76810119	5274.17	100	77.07	94.95	101	99.73
Ghana	GHA_KYG_71_23	adult	PRJNA560089	-	Illumina TruSeq	MiSeq	not available	250	29	4758	4	0.0004		880	0.2196	9172	114.7	97.9	0	0	0	0
Ghana	GHA_KYG_71_25	adult	PRJNA997216	REPLIG	Illumina DNAFlex	NextSeq 550	10027639	150	125	4793747	6618110	0.6903	1347158	485247	0.3673	835620	73.88	97.3	1.15	0.17	2.12	0.79
Ghana	GHA_NLG_15_01	adult	PRJNA560089	-	Illumina TruSeq	MiSeq	not available	250	29	12375	17	0.0007	24729	1119	0.2254	24331	308.6	99.05	0	0	0	0
Ghana	GHA_NLG_15_02	adult	PRJNA560089	-	Illumina TruSeq	MiSeq	not available	250	29	11168	36	0.0016	22289	520	0.1359	21989	280.98	98.64	0	0	0	0
Ghana	GHA_NLG_150_03	adult	PRJNA560089	-	Illumina TruSeq	MiSeq	not available	250	29	13802	28	0.001	27576	1187	0.1807	27129	343.88	99.01	0	0	0	0
Ghana	GHA_NLG_24_04	adult	PRJNA560089	-	Illumina TruSeq	MiSeq	not available	250	29	5282	42	0.004	10519	270	0.0981	10216	124.18	99.05	0	0	0	0
Ghana	GHA_NLG_24_04	adult	PRJNA973712	-	NEBNext	HiSeq 2500	55821151	100	75	48480963	876897	0.009	95725159	586080	0.0415	90233110	3447.93	99.99	91.56	94.77	41.6	99.36
Ghana	GHA_NLG_24_05	adult	PRJNA560089	-	Illumina TruSeq	MiSeq	not available	250	29	9270	4	0.0002	18534	564	0.1564	18338	226.5	98.52	0	0	0	0
Ghana	GHA_NLG_53_06	adult	PRJNA560089	-	Illumina TruSeq	MiSeq	not available	250	29	9178	161	0.0088	18192	815	0.1754	17978	229.38	98.45	0	0	0	0
Ghana	GHA_NLG_53_07	adult	PRJNA560089	-	Illumina TruSeq	MiSeq	not available	250	29	6437	231	0.0179	12634	412	0.1111	12320	147.6	98.83	0	0	0	0
Ghana	GHA_NLG_72_08	adult	PRJNA560089	-	Illumina TruSeq	MiSeq	not available	250	29	8872	21	0.0012	17719	545	0.1761	17468	219.39	98.74	0	0	0	0
Ghana	GHA_NLG_72_09	adult	PRJNA560089	-	Illumina TruSeq	MiSeq	not available	250	29	7367	60	0.0041	14649	1108	0.2884	14433	180.18	99.05	0	0	0	0
Ghana	GHA_NLG_72_11	adult	PRJNA560089	-	Illumina TruSeq	MiSeq	not available	250	29	7887	50	0.0032	15716	490	0.1423	15547	201.62	98.52	0	0	0	0
Ghana	GHA_NLG_86_13	adult	PRJNA560089	-	Illumina TruSeq	MiSeq	not available	250	29	12478	54	0.0022	24896	900	0.2339	24683	316.77	98.81	0	0	0	0
Ghana	GHA_NLG_86_14	adult	PRJNA560089	-	Illumina TruSeq	MiSeq	not available	250	29	5671	1	0.0001	11340	454	0.2206	11160	139.52	98.44	0	0	0	0
Ghana	GHA_NLG_86_14	adult	PRJNA973712	-	NEBNext	HiSeq 2500	56544198	100	75	49851644	99329	0.001	99427469	183530	0.0348	94569164	5367.1	99.96	96.92	94.87	6.26	0.42
Ghana	GHA_NLG_89_16	adult	PRJNA560089	-	Illumina TruSeq	MiSeq	not available	250	29	4809	10	0.001	9599	1024	0.2561	9466	116.13	97.45	0	0	0	0
Ghana	GHA_NYR_12_05	adult	PRJNA560089	-	Illumina TruSeq	MiSeq	not available	250	29	7227	22	0.0015	14423	460	0.1302	14275	177.7	98.18	0	0	0	0
Ghana	GHA_NYR_23_01	adult	PRJNA560089	-	Illumina TruSeq	MiSeq	not available	250	29	7181	172	0.012	14184	461	0.0864	14053	172.85	96.44	0	0	0	0
Ghana	GHA_NYR_31_18	adult	PRJNA560089	-	Illumina TruSeq	MiSeq	not available	250	29	6910	10	0.0007	13808	428	0.1236	13583	165.97	98.7	0	0	0	0
Ghana	GHA_NYR_47_07	adult	PRJNA560089	-	Illumina TruSeq	MiSeq	not available	250	29	6621	68	0.0051	13171	1036	0.1397	12958	155.96	97.1	0	0	0	0
Ghana	GHA_NYR_73_09	adult	PRJNA560089	-	Illumina TruSeq	MiSeq	not available	250	29	5953	57	0.0048	11843	551	0.4209	11770	146.95	92.36	0	0	0	0
Ghana	GHA_NYR_73_10	adult	PRJNA560089	-	Illumina TruSeq	MiSeq	not available	250	29	6349	49	0.0039	12638	676	0.2443	12513	157.9	97.78	0	0	0	0
Ghana	GHA_NYR_73_11	adult	PRJNA560089	-	Illumina TruSeq	MiSeq	not available	250	29	8623	45	0.0026	17105	853	0.1626	16995	213.39	95.68	0	0	0	0
Ghana	GHA_NYR_73_12	adult	PRJNA560089	-	Illumina TruSeq	MiSeq	not available	250	29	6190	12	0.001	12359	1024	0.1414	12191	147.21	97.42	0	0	0	0
Ghana	GHA_NYR_96_14	adult	PRJNA560089	-	Illumina TruSeq	MiSeq	not available	250	29	7291	3	0.0002	14577	743	0.1824	14432	177.76	98.39	0	0	0	0
Ghana	GHA_NYR_96_15	adult	PRJNA997216	REPLIG	Illumina DNAFlex	NextSeq 550	16464956	150	125	13066536	13479203	0.5158	2712919	135333	0.082	2418101	745.56	98.57	3.49	0.24	0.66	0.43
Ghana	GHA_NYR_96_15	adult	PRJNA560089	-	Illumina TruSeq	MiSeq	not available	250	29	7927	18	0.0011	15832	576	0.1517	15652	193.37	98.58	0	0	0	0
Ghana	GHA_NYR_96_16	adult	PRJNA560089	-	Illumina TruSeq	MiSeq	not available	250	29	5375	6	0.0006	10738	455	0.1403	10595	130.8	98.27	0	0	0	0
Ghana	GHA_NYR_96_17	adult	PRJNA560089	-	Illumina TruSeq	MiSeq	not available	250	29	6733	38	0.0028	13398	1136	0.2236	13162	160.36	98.73	0	0	0	0
Ghana	GHA_OHP_33_02	adult	PRJNA973712	-	NEBNext	HiSeq 2500	12743441	100	75	11668834	682701	0.0293	22335715	98683	0.0243	21327996	769	95.81	25.94	60.47	14.16	19.76
Ghana	GHA_OHP_33_03	adult	PRJNA973712	-	NEBNext	HiSeq 2500	12371481	100	75	11029216	978402	0.0444	20911961	73373	0.0228	20078101	915	98.47	24.43	67.07	19.74	48.56
Ghana	GHA_OHP_33_03	adult	PRJNA973712	-	NEBNext	HiSeq 2500	57946789	100	75	50991421	3037158	0.0298	97686373	474514	0.0339	92774835	3644.68	99.76	94.11	94.91	44.08	99.25
Ghana	GHA_OHP_45_04	adult	PRJNA973712	-	NEBNext	HiSeq 2500	12371481	100	75	10884355	700045	0.0322	20963056	178006	0.0306	19924969	1106	98.62	24.06	67.29	9.58	2.65
Ghana	GHA_SEN_139_06	adult	PRJNA973712	-	NEBNext	HiSeq 2500	21815127	100	75	13955945	5386290	0.193	22110643	68039	0.0796	20101926	8073	98.89	7.04	2.94	1663.76	99.74
Ghana	GHA_SEN_156_02	adult	PRJNA997216	REPLIG	Illumina DNAFlex	NextSeq 550	16464956	150	125	10178290	711714	0.035	19184588	2501927	0.2994	13204542	967.31	99.11	19.02	28.58	74.35	97.99
Ghana	GHA_SEN_156_04	adult	PRJNA973712	-	NEBNext	HiSeq 2500	20631169	100	75	13863033	147339	0.0053	27507338	86316	0.0292	26168036	1316	98.6	29.94	68.09	198.15	99.69
Ghana	GHA_TAK_40_12	adult	PRJNA997216	REPLIG	Illumina DNAFlex	NextSeq 550	13946286	150	125	11312581	7607729	0.3363	2143137	127039	0.3744	1293739	737.47	98.57	1.74	0.11	2.36	1.5
Ghana	GHA_TAK_80_19	adult	PRJNA973712	-	NEBNext	HiSeq 2500	41454240	100	75	35739792	350195	0.0049	70973522	379426	0.0403	67000290	2840.72	99.79	67.93	94.38	32.51	96.82
Ghana	GHA_TAK_87_20	adult	PRJNA973712	-	NEBNext	HiSeq 2500	43006708	100	75	36985064	54387	0.0007	73766234	357169	0.0407	69484510	1482.27	99.77	70.49	94.54	31.06	95.16
Ghana	GHA_WIA_01_01	adult	PRJNA560089	-	Illumina Illumina TruSeq DNA HT	MiSeq	not available	250	100	147536	203	0.0007	294772	4601	0.1565	247623	1595.73	96.46	0	0	0	0
Ghana	GHA_WIA_01_03	adult	PRJNA560089	-	Illumina Illumina TruSeq DNA HT	MiSeq	not available	250	100	135643	29	0.0001	271209	3322	0.1658	225686	1177.92	96.34	0	0	0	0
Ghana	GHA_WIA_09_01	adult	PRJNA560089	-	Illumina Illumina TruSeq DNA HT	MiSeq	not available	250	100	124528	961	0.0039	248036	5381	0.1541	209001	1328.24	96.35	0	0	0	0
Ghana	GHA_WIA_09_02	adult	PRJNA560089	-	Illumina Illumina TruSeq DNA HT	MiSeq	not available	250	100	83681	41	0.0002	167268	2087	0.1483	141996	574.39	96.2	0	0	0	0
Ghana	GHA_WIA_12_03	adult	PRJNA560089	-	Illumina Illumina TruSeq DNA HT	MiSeq	not available	250	100	156127	1322	0.0042	310885	3671	0.1835	258768	841.5	96.32	0	0	0	0
Ghana	GHA_WIA_13_05	adult	PRJNA560089	-	Illumina TruSeq	MiSeq	not available	250	29	201101	679	0.0017	401464	4136	0.1661	110990	1760.94	96.59	0	0	0	0
Ghana	GHA_WIA_13_07	adult	PRJNA560089	-	Illumina Illumina TruSeq DNA HT	MiSeq	not available	250	100	182065	819	0.0022	363217	3944	0.1652	295401	2229.6	96.41	0	0	0	0
Ghana	GHA_WIA_156_04	adult	PRJNA973712	-	NEBNext	HiSeq 2500	39119821	100	75	34648362	988111	0.0143	68093645	437407	0.0366	64535023	4246.81	98.72	64.03	94.56	131.74	99.68
Ghana	GHA_WIA_156_05	adult	PRJNA997216	REPLIG	Illumina DNAFlex	NextSeq 550	12748652	150	125	10600755	6090773	0.2873	739906	17669	0.5439	312753	53.09	96.3	0.42	0.02	0.14	0.17
Ghana	GHA_WIA_19_02	adult	PRJNA560089	-	Illumina Illumina TruSeq DNA HT	MiSeq	not available	250	100	104531	37	0.0002	208969	3955	0.166	173423	1414.75	96.33	0	0	0	0
Guinea	GUI_MAM_2678S	adult	PRJNA289926	-	KAPA LTP	HiSeq 2500	57530102	100	60	30645589	18683502	0.3048	36645972	35471	0.0809	33093795	778.06	99	32.19	78.82	81.26	96.42
Guinea	GUI_MAM_9977S	adult	PRJNA289926	-	KAPA LTP	HiSeq 2500	65879969	100	60	19195290	30219298	0.7872	6610014	15170	0.0711	6011457	297.92	97.22	4.84	0.12	73.4	96.12
Guinea	GUI_MOR_5223S	adult	PRJNA289926	-	KAPA LTP	HiSeq 2500	63171267	100	60	20438853	30415688	0.7441	8763845	22409	0.0547	8125126	328.1	97.23	0.59	94.56	45.07	91.6
Guinea	GUI_MOR_8153S	adult	PRJNA289926	-	KAPA LTP	HiSeq 2500	66200172	100	60	21765705	31201441	0.7168	10453417	42478	0.0659	9560698	835.91	98.6	2.23	0.02	41.11	90.19
Liberia	LIB_BON_IDLIB1_K1	adult	PRJNA289926	-	KAPA LTP	HiSeq 2000	90122765	100	60	80227226	2075888	0.0129	136878241	147791	0.1295	117199775	2829.82	98.99	110.97	92.62	608.57	99.68
Mali	MAL_KIT_M50	adult	PRJNA560089	-	Illumina Illumina TruSeq DNA HT	MiSeq	not available	250	100	162933	844	0.0026	324934	6095	0.1682	269678	599.89	96.27	0	0	0	0
Mali	MAL_KIT_M50	adult	PRJNA997216	-	NEBNext	HiSeq 2500	11222984	100	75	9842508	19125921	0.9716	510714	3226	0.0381	480961	232	97.19	0.19	0	32.38	87.67
Mali	MAL_KOU_M17	adult	PRJNA560089	-	Illumina TruSeq	MiSeq	not available	250	29	152998	51	0.0002	305843	4827	0.1274	97104	1537.33	96.52	0	0	0	0
Mali	MAL_KOU_M19	adult	PRJNA560089	-	Illumina Illumina TruSeq DNA HT	MiSeq	not available	250	100	196326	684	0.0017	391902	4910	0.1702	324872	345.48	96.18	0	0	0	0
Mali	MAL_KOU_M19	adult	PRJNA997216	-	NEBNext	HiSeq 2500	6338588	100	75	5721951	8332062	0.7281	3040473	6360	0.0154	2937764	262	97.74	3.45	0.09	8.74	0.46
Mali	MAL_KOU_M33	adult	PRJNA560089	-	Illumina Illumina TruSeq DNA HT	MiSeq	not available	250	100	109573	188	0.0009	218925	5959	0.1787	179232	736.57	96.22	0	0	0	0
Mali	MAL_KOU_M37	adult	PRJNA997216	-	NEBNext	HiSeq 2500	16855316	100	75	11491362	22658690	0.9859	235481	1338	0.0478	206070	26	57.05	0.16	0	1.4	0
Mali	MAL_KOU_M37	adult	PRJNA560089	-	Illumina Illumina TruSeq DNA HT	MiSeq	not available	250	100	183594	3110	0.0085	364020	4498	0.192	293429	692.14	96.22	0	0	0	0
Mali	MAL_KOU_M42	adult	PRJNA560089	-	Illumina Illumina TruSeq DNA HT	MiSeq	not available	250	100	158084	10222	0.0323	305824	3614	0.156	257403	1022.09	96.3	0	0	0	0
Mali	MAL_KOU_M42	adult	PRJNA997216	-	NEBNext	HiSeq 2500	12515525	100	75	11220225	20941369	0.9332	1342920	3553	0.0394	1256193	719	98.74	1.25	0.02	8.14	0.3
Mali	MAL_KOU_M43	adult	PRJNA560089	-	Illumina Illumina TruSeq DNA HT	MiSeq	not available	250	100	190192	1491	0.0039	378783	9600	0.1699	313244	1641.44	96.45	0.02	0	0	0
Mali	MAL_KOU_M43	adult	PRJNA997216	-	NEBNext	HiSeq 2500	9483418	100	75	7985196	2190862	0.1372	13705454	94469	0.0541	12694610	1631	99.1	15.33	28.71	1.79	0.13
Mali	MAL_KOU_M8	adult	PRJNA560089	-	Illumina Illumina TruSeq DNA HT	MiSeq	not available	250	100	205368	3808	0.0093	405230	3880	0.1687	335950	1185.17	96.39	0	0	0	0
Mali	MAL_SIN_M25	adult	PRJNA560089	-	Illumina Illumina TruSeq DNA HT	MiSeq	not available	250	100	176656	527	0.0015	352225	8578	0.1957	281851	3383.93	96.52	0	0	0	0
Mali	MAL_TOU_M30	adult	PRJNA560089	-	Illumina Illumina TruSeq DNA HT	MiSeq	not available	250	100	193606	3242	0.0084	383774	49993	0.256	284017	983.14	97.95	0	0	0	0
Sierra Leone	SIE_KAM_3897F	adult	PRJNA289926	-	KAPA LTP	HiSeq 2500	68579067	100	60	29250444	27041477	0.4622	26811982	29015	0.0704	24457543	702.02	99.26	23.1	67.02	108.24	97.38
Sierra Leone	SIE_NIT_8766F	adult	PRJNA289926	-	KAPA LTP	HiSeq 2500	19903197	100	60	11246967	20095381	0.8934	1806351	4150	0.0924	1584328	95.48	87.33	1.06	0.92	26.34	78.12
Sierra Leone	SIE_PAL_0439F	adult	PRJNA289926	-	KAPA LTP	HiSeq 2500	68195064	100	60	20772927	33555183	0.8077	6526270	9004	0.0575	6004718	207.31	97.35	5.5	0.17	15.23	24.17
Uganda	UGA_KAB_IDUG1_K3	adult	PRJNA289926	-	KAPA LTP	HiSeq 2000	52706712	100	60	44373500	3379531	0.0381	73759111	136440	0.0959	65604471	1944.73	99.1	61.69	89.79	387.52	99.61
Uganda	UGA_KAB_OV3	adult	PRJNA289926	-	KAPA LTP	HiSeq 2000	not available	100	60	47234612	2575284	0.0273	78619355	104635	0.116	68413219	3836.73	99.12	59.1	89.23	918.71	99.76
